# Supplementary material for: Exploring the RNA Editing Events and Their Potential Regulatory Roles in Tea Plant (Camellia sinensis L.)
Source: MDPI journal article supplement (doi:10.3390/ijms232113640), 2022-11-07
Supplement: s1 [file s1]

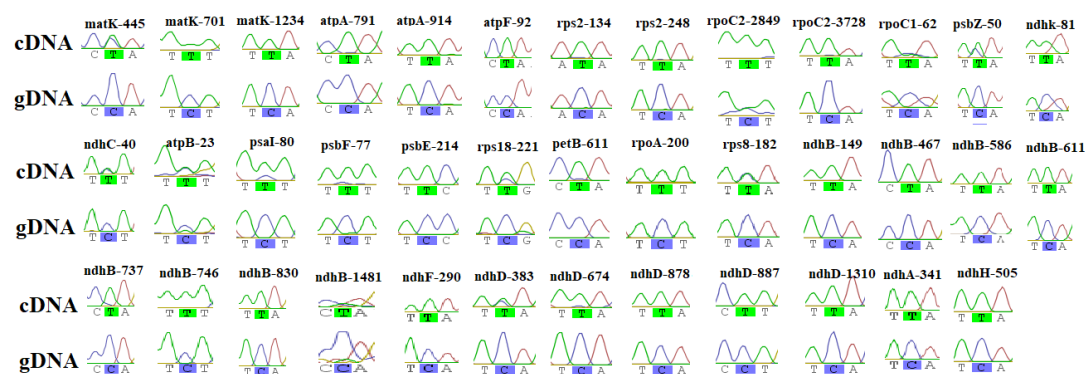

**Figure S1.** Sequencing chromatograms show RNA-editing sites in tea chloroplast.

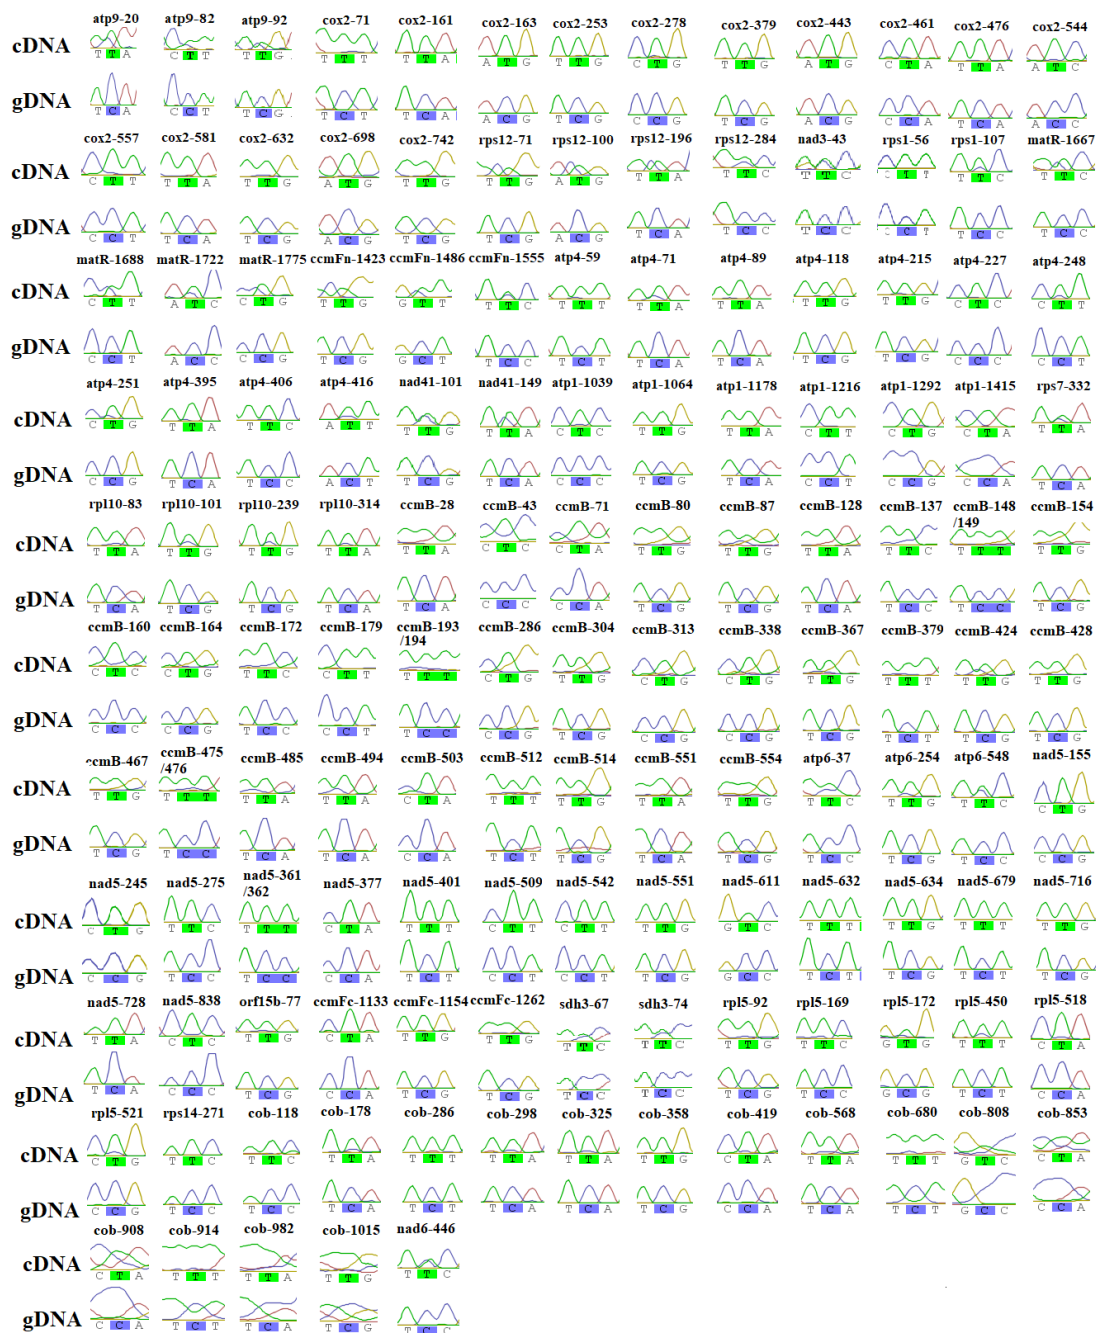

Figure S2. Sequencing chromatograms show RNA-editing sites in tea mitochondria.

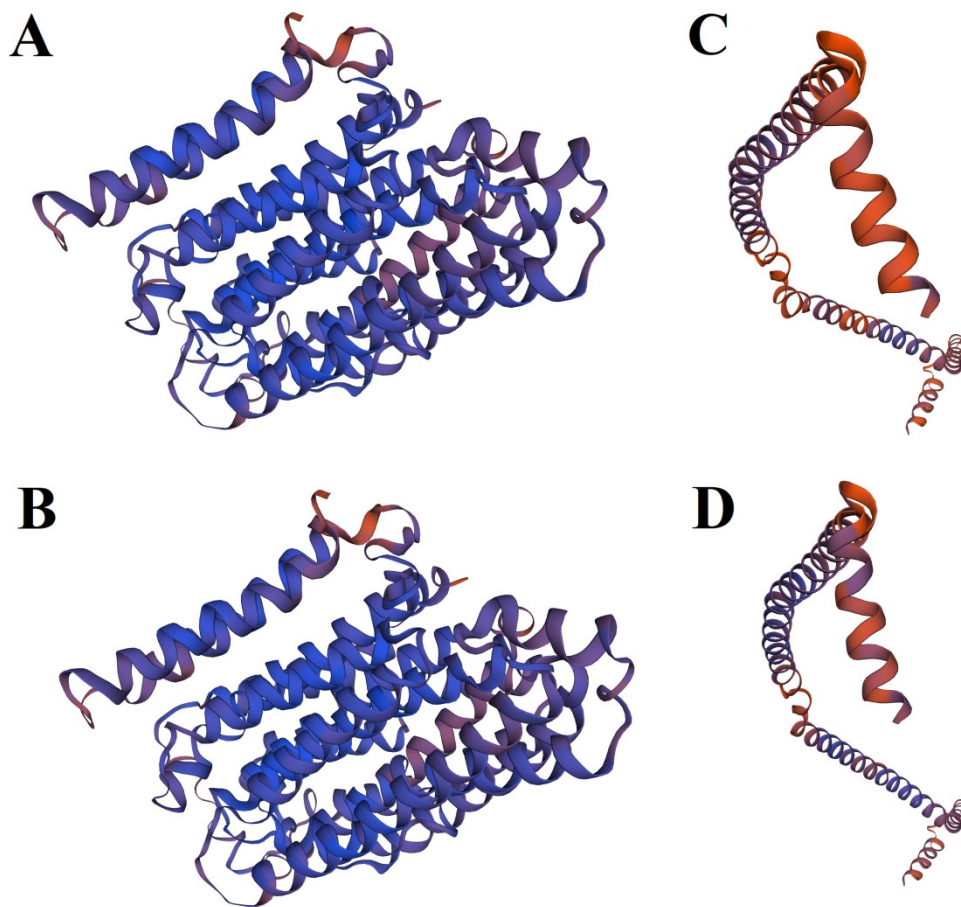

**Figure S3.** 3-D structures of ndhB and atp4. (A) Before ndhB is edited. (B) After ndhB is edited. (C) Before atp4 is edited. (D) After atp4 is edited.
