# Supplementary material for: Exploring the RNA Editing Events and Their Potential Regulatory Roles in Tea Plant (Camellia sinensis L.)
Source: Int J Mol Sci. 2022 Nov 7;23(21):13640. doi: 10.3390/ijms232113640 (PMC9654872; doi:10.3390/ijms232113640)
Supplement: Supplementary file 1 [file ijms-23-13640-s001.zip]

Archive with 7 entries (7 files):
- Figures S.pdf
- Table S1.xlsx
- Table S2.xlsx
- Table S3.xlsx
- Table S4.xlsx
- Table S5.xlsx
- Table S6.xlsx
