# Supplementary material for: Exploring the RNA Editing Events and Their Potential Regulatory Roles in Tea Plant (Camellia sinensis L.)
Source: Int J Mol Sci. 2022 Nov 7;23(21):13640. doi: 10.3390/ijms232113640 (PMC9654872; doi:10.3390/ijms232113640)
Supplement: Supplementary file 1 [file ijms-23-13640-s001.zip › Table S1.xlsx]

## Sheet: Sheet1
Table S1. The primers used for RT-PCR and PCR assays
Organelle name	Gene name	Primer-F	Primer-R
chloroplast	matK	GAACTAGATAGATCTCAGCAACAC	TCATTCATGACTGGCCAGATC
	atpA	ATGGTAACCATTCGAGCCG	TGCTTGTTCCTGAAGCATAAAAC
	atpF	ATGAAAAATGTAACCGATTCTTTCG	ATCAGTTATTTCTTTCATCGCCC
	rps2	GGCAGGAGTTCATTTTGGCC	GCTAGAATGACCCTCACAAATTG
	rpoC2	AGGACAAATGGTTTGATTCGAGA	GAATCCGGTACCAACAGGTATC
	rpoC1	ATGAATCAGAACTTTTCTTCTATGA	GGTACTATATGAACAGGCCTG
	psbZ	ATGACTATTGCTTTCCAATTGG	AGAGATTAGAGAATTAAGGATACCC
	ndhK	ATGGGCAATGAGTTTCGATGT	CACGAGGGATCTCTGAAGTAGAT
	ndhC	GCGTCTATGTTTCTGCTTTACG	CTAAGACCATTCCAATGCCCC
	atpB	GCAAAAACTTTCGCCATATTTGAC	GTTCATAGCCTTCGCGGTAG
	psaI	ATGATAACTTTCAACTTTCCCTCTC	GAGATTTGGTTCTATCGGATCTAAAC
	psbF	ATGACCATAGATCGAACCTATCC	TTATCGTTGGATGAACTGCATTG
	psbE	ATGTCTGGAAGCACAGGAGAAC	CTAAAAGGATCGACTAAATTCATCG
	rps18	CCAAGCGGTCTTTTCGTAGG	CTAAGACCAGTAGTTCTAGCGG
	petB	CGTCTCGAAATTCAGGCGA	CTATAAAGGACCAGAAATGCCTTG
	rpoA	ATGGTTCGAGAGAAAGTAACAG	CTAGAATGCCCAATATCTGGTTTAC
	rps8	CACTGTTGCTGACATAATAACCTC	CCGCCGATTCCTTCTAGTC
	ndhB	ATGATCTGGCATGTACAGAATG	AAAGGGTATCCTGAGCAATTG
	ndhF	ATGGAACATACATATCAATATGCGT	CATATTTGATGCCTTCTCCGAC
	ndhD	GGTCTAAGTGTATCTTGTCTTTACC	GAAATCCGGGTAAATACCAATACC
	ndhA	GAGAAATATCCGCAGGGATACAAC	GCGAAAGAAGTTGAGAAGAAGTTG
	ndhH	GTCAATATGGGTCCTCACCAC	CAACGATCAACTTCTCCCATAATG
mitochondria	atp9	CAACTCGAGATGTTAGAAGGTGC	CGATCGGAATACGGATGAGATC
	nad6	TGGTTTGATGGTTGTACGTGC	GTAGATCGTGAGTGGGTCTGT
	cox2	ATGATTGTTCTAGAATGGCGATTCC	TTAAGCTTCCCCGGTTTGGTT
	rps12	AAAGGAAAGAGCGATGCCTAC	CCGCACCATATTTGGATCTGC
	nad3	CAAGTGGGCTGTGGTGATG	GCCCTATCACTATAGGTTATTCCC
	rps1	AGTTTTACGCTTAAAGGGAGAAATG	TTAGAACACCACAATATTCGTCCTT
	matR	ATGAAAGAGGCGATCAGAATGG	CTAGACTAGACTAGTAGTTGAGTGC
	ccmFn	GCTATCCTGCTCTATTCTTACGTAG	CTAGTTGCGGGACGAAATCC
	atp4	ATGAGATTGAGTTCCACGAATATGC	CCACCCGAACCATTCTTAAGAC
	nad41	AGGTATTCGGGGAATCCTCC	AGGAGTCATGTTTAACCTTGAATGC
	atp1	GTGTCTATGTAGCGATTGGACAG	TCATAGGTAAGGCAAAGCACTTTC
	rps7	GAACAAGAGTTCGTGCTATTGTTTA	CACCATCTGAAATGCGCGA
	rpl10	ATGCCATTCGGAAGAAGTCTTC	GGTGGTATCCCGAGATTGAAGA
	ccmB	ATGAGACGACTCTTTCTTGAACTAT	CAATCTTGTAAACTAATCGAGACCG
	atp6	TATAGGAAACTTGTATTTCTCATTCAC	ATCGTAGAAACATGAGCTTGTG
	nad5	CCTGCTCGGTAGTTCCGTA	CCAATTAGAGATAAGCTGCCCATG
	orf115b	ATGGACCATGGACTAAACGG	TAAGCAACCTTCGCATTTCCTG
	ccmFc	GAAGCTCTCGCCTTACCAAC	GCAATTATGAACTCCACGGAAC
	sdh3	ATGAATATCCTTCGCCCGTTATC	TCTTCCAAGAAAGAGAAATCCCG
	rpl5	TTACGAAGATGTATCACGTCAGG	TTACTGAGTTTCCCCCTCATCTT
	rps14	ATGTCGGAGAAGCGAAATATACG	CTACCAAGACGATTTCTTTATGCC
	cob	ATGACTATAAGAAACCAACGATTCTC	TCAGGTGTGATCAGTCTCATC
