# Supplementary material for: Exploring the RNA Editing Events and Their Potential Regulatory Roles in Tea Plant (Camellia sinensis L.)
Source: Int J Mol Sci. 2022 Nov 7;23(21):13640. doi: 10.3390/ijms232113640 (PMC9654872; doi:10.3390/ijms232113640)
Supplement: Supplementary file 1 [file ijms-23-13640-s001.zip › Table S2.xlsx]

## Sheet: Sheet1
Table S2. RNA editing sites in chloroplasts and mitochondria by PREP
chloroplast						mitochondria
Gene	Genome position	Edited nucleotide	Amino acid changes	Editing type	Position in codon	Gene	Genome position	Edited nucleotide	Amino acid changes	Editing type	Position in codon
matK	3080	467	R-W	C>T	1	atp1	22491	1039	P-S	C>T	1
atpA	11605	914	P-L	C>T	2	atp1	22678	1064	S-L	C>T	2
atpA	11728	791	P-L	C>T	2	atp1	22722	1178	S-L	C>T	2
atpF	13757	92	S-L	C>T	2	atp1	22752	1216	L-F	C>T	1
atpI	15622	689	P-L	C>T	2	atp1	45040	1292	P-L	C>T	2
rps2	16983	248	A-V	C>T	2	atp1	54812	1415	P-L	C>T	2
matK	3102	445	H-Y	C>T	1	atp1	54842	1490	P-L	C>T	2
rpoC2	17886	3728	S-L	C>T	2	atp4	54874	71	S-L	C>T	2
matK	2916	631	H-Y	C>T	1	atp4	54884	89	S-L	C>T	2
matK	2313	1234	H-Y	C>T	1	atp4	54926	215	S-L	C>T	2
rpoC2	18889	2726	S-L	C>T	2	atp4	54974	248	P-L	C>T	2
rpoC1	22269	1589	S-L	C>T	2	atp4	54983	395	S-L	C>T	2
rpoC1	24531	62	S-F	C>T	2	atp4	55004	416	T-I	C>T	2
rpoB	25475	2336	S-L	C>T	2	atp6	55007	116	S-L	C>T	2
rpoB	25811	2000	P-L	C>T	2	atp6	55015	167	P-L	C>T	2
ndhB	98729	586	H-Y	C>T	1	atp6	85599	173	P-L	C>T	2
rpoB	27245	566	S-L	C>T	2	atp6	85705	224	S-F	C>T	2
rpoB	27260	551	P-L	C>T	2	atp6	85722	254	S-L	C>T	2
rpoB	27338	473	S-F	C>T	2	atp6	85977	262	R-C	C>T	1
rpoB	27473	338	S-L	C>T	2	atp6	85999	269	P-L	C>T	2
rps14	38880	149	P-L	C>T	2	atp6	86007	401	S-L	C>T	2
rps14	38949	80	T-M	C>T	2	atp6	86065	460	P-S	C>T	1
aacD	59121	64	S-L	C>T	2	atp6	86073	463	H-Y	C>T	1
aacD	60526	1469	S-L	C>T	2	atp6	86085	485	P-L	C>T	2
psaI	61448	80	S-L	C>T	2	atp6	86161	527	S-L	C>T	2
psbF	66719	77	P-L	C>T	2	atp6	106806	548	S-F	C>T	2
petB	78764	611	S-L	C>T	2	atp6	106905	635	P-L	C>T	2
ndhF	114821	205	H-Y	C>T	1	atp6	106949	656	S-L	C>T	2
rpoA	81066	368	S-L	C>T	2	atp6	106951	664	H-Y	C>T	1
ndhG	121189	166	H-Y	C>T	1	atp6	108458	671	S-F	C>T	2
rps8	82841	182	T-I	C>T	2	atp6	118704	680	S-L	C>T	2
ndhB	97156	1481	P-L	C>T	2	atp6	118765	707	T-I	C>T	2
ndhB	97807	830	S-F	C>T	2	atp6	118782	718	Q-X	C>T	1
psbE	66843	214	P-S	C>T	1	atp9	118794	20	S-L	C>T	2
ndhB	98570	746	S-F	C>T	2	atp9	118803	50	S-L	C>T	2
ndhB	98579	737	S-L	C>T	2	atp9	120288	82	L-F	C>T	1
ndhB	98705	611	S-F	C>T	2	atp9	138085	92	S-L	C>T	2
ndhB	98848	467	S-L	C>T	2	atp9	138129	134	S-L	C>T	2
ndhB	99167	149	S-L	C>T	2	atp9	138195	182	S-L	C>T	2
ndhF	114736	290	S-L	C>T	2	atp9	138246	191	P-L	C>T	2
rpoB	26838	973	L-F	C>T	1	atp9	138270	212	S-L	C>T	2
ndhD	118369	1310	S-F	C>T	2	atp9	138283	215	S-F	C>T	2
ndhD	118792	887	T-I	C>T	2	atp9	138351	223	R-X	C>T	1
ndhD	118801	878	S-L	C>T	2	ccmB	138366	28	H-Y	C>T	1
ndhD	119005	674	S-L	C>T	2	ccmB	138384	71	P-L	C>T	2
rpoC2	19325	2290	R-W	C>T	1	ccmB	138448	80	S-L	C>T	2
ndhD	119296	383	T-I	C>T	2	ccmB	138549	128	S-L	C>T	2
ndhD	119679	2	S-L	C>T	2	ccmB	138574	137	S-F	C>T	2
ndhG	121041	314	S-L	C>T	2	ccmB	138664	149	P-L	C>T	2
ndhA	122365	1073	S-L	C>T	2	ccmB	138666	154	R-W	C>T	1
ndhA	122872	566	S-L	C>T	2	ccmB	138756	164	P-L	C>T	2
ndhA	124204	341	P-L	C>T	2	ccmB	180991	172	P-S	C>T	1
						ccmB	182501	179	P-L	C>T	2
						ccmB	182525	193	P-F	C>T	1
						ccmB	182546	194	P-F	C>T	2
						ccmB	182557	286	R-W	C>T	1
						ccmB	182584	313	R-C	C>T	1
						ccmB	182591	338	P-L	C>T	2
						ccmB	182618	424	R-C	C>T	1
						ccmB	182687	428	S-L	C>T	2
						ccmB	196328	467	S-L	C>T	2
						ccmB	196376	476	P-L	C>T	2
						ccmB	196401	485	S-L	C>T	2
						ccmB	196493	494	S-L	C>T	2
						ccmB	196497	503	P-L	C>T	2
						ccmB	196526	512	S-F	C>T	2
						ccmB	196653	514	R-C	C>T	1
						ccmB	196658	551	S-L	C>T	2
						ccmB	196685	554	S-L	C>T	2
						ccmB	196727	572	P-L	C>T	2
						ccmB	196736	596	S-L	C>T	2
						ccmC	196749	103	H-Y	C>T	1
						ccmC	196755	184	R-W	C>T	1
						ccmC	196772	299	S-F	C>T	2
						ccmC	196787	331	R-W	C>T	1
						ccmC	196793	395	S-L	C>T	2
						ccmC	196794	400	L-F	C>T	1
						ccmC	196856	436	P-S	C>T	1
						ccmC	196922	451	P-S	C>T	1
						ccmC	196940	463	R-C	C>T	1
						ccmC	196958	473	P-L	C>T	2
						ccmC	271978	497	S-F	C>T	2
						ccmC	272008	521	S-L	C>T	2
						ccmC	272104	548	S-F	C>T	2
						ccmC	272151	568	P-S	C>T	1
						ccmC	272164	575	P-L	C>T	2
						ccmC	272166	605	S-F	C>T	2
						ccmC	272172	608	P-L	C>T	2
						ccmC	272181	656	P-L	C>T	2
						ccmFc	272840	38	S-F	C>T	2
						ccmFc	272858	50	P-L	C>T	2
						ccmFc	272897	52	R-C	C>T	1
						ccmFc	272928	103	P-S	C>T	1
						ccmFc	272964	119	S-F	C>T	2
						ccmFc	272984	122	S-F	C>T	2
						ccmFc	273005	146	P-L	C>T	2
						ccmFc	273755	151	P-S	C>T	1
						ccmFc	274346	155	S-L	C>T	2
						ccmFc	275370	203	T-M	C>T	2
						ccmFc	275379	305	S-L	C>T	2
						ccmFc	295880	391	R-C	C>T	1
						ccmFc	295940	406	R-C	C>T	1
						ccmFc	295979	620	A-V	C>T	2
						ccmFc	295984	704	A-V	C>T	2
						ccmFc	295993	1133	P-L	C>T	2
						ccmFc	296090	1154	S-L	C>T	2
						ccmFc	296098	1309	R-X	C>T	1
						ccmFn	296125	80	P-L	C>T	2
						ccmFn	296233	140	P-L	C>T	2
						ccmFn	296320	179	S-L	C>T	2
						ccmFn	296558	184	R-C	C>T	1
						ccmFn	296596	193	P-S	C>T	1
						ccmFn	296618	290	S-L	C>T	2
						ccmFn	296630	298	R-W	C>T	1
						ccmFn	296645	325	L-F	C>T	1
						ccmFn	296735	433	P-S	C>T	1
						ccmFn	296794	520	R-C	C>T	1
						ccmFn	297112	758	S-L	C>T	2
						ccmFn	297140	796	R-C	C>T	1
						ccmFn	297157	818	S-L	C>T	2
						ccmFn	297172	830	P-L	C>T	2
						ccmFn	297190	845	S-L	C>T	2
						ccmFn	297223	935	A-V	C>T	2
						ccmFn	297241	994	R-C	C>T	1
						ccmFn	297284	1312	R-W	C>T	1
						ccmFn	297304	1340	P-L	C>T	2
						ccmFn	297308	1357	H-Y	C>T	1
						ccmFn	297320	1372	R-W	C>T	1
						ccmFn	297329	1390	R-W	C>T	1
						ccmFn	297355	1423	R-W	C>T	1
						ccmFn	320393	1441	R-C	C>T	1
						ccmFn	320434	1484	S-L	C>T	2
						ccmFn	320482	1504	L-F	C>T	1
						ccmFn	320485	1508	P-L	C>T	2
						ccmFn	320515	1520	S-L	C>T	2
						ccmFn	320522	1529	S-F	C>T	2
						ccmFn	320542	1555	P-S	C>T	1
						cob	320569	118	P-S	C>T	1
						cob	320617	178	H-Y	C>T	1
						cob	320627	286	L-F	C>T	1
						cob	320639	298	H-Y	C>T	1
						cob	320654	325	H-Y	C>T	1
						cob	320690	358	R-W	C>T	1
						cob	320695	419	P-L	C>T	2
						cob	320759	568	H-Y	C>T	1
						cob	320791	680	S-F	C>T	2
						cob	320906	808	P-S	C>T	1
						cob	320987	853	H-Y	C>T	1
						cob	323099	908	P-L	C>T	2
						cob	323120	914	S-F	C>T	2
						cob	323267	982	H-Y	C>T	1
						cob	323300	1015	R-C	C>T	1
						cob	323426	1084	P-S	C>T	1
						cob	323444	1124	P-L	C>T	2
						cox2	323722	71	S-F	C>T	2
						cox2	323773	161	S-L	C>T	2
						cox2	323806	163	R-W	C>T	1
						cox2	323815	253	R-W	C>T	1
						cox2	323845	278	P-L	C>T	2
						cox2	323872	379	R-W	C>T	1
						cox2	323893	443	T-M	C>T	2
						cox2	323903	461	P-L	C>T	2
						cox2	323908	476	S-L	C>T	2
						cox2	323917	544	P-S	C>T	1
						cox2	323948	557	P-L	C>T	2
						cox2	323956	581	S-L	C>T	2
						cox2	323962	632	S-L	C>T	2
						cox2	396108	698	T-M	C>T	2
						cox2	396133	742	R-W	C>T	1
						matR	396247	326	P-L	C>T	2
						matR	396285	917	S-L	C>T	2
						matR	396361	1667	S-F	C>T	2
						matR	396484	1688	P-L	C>T	2
						matR	396559	1708	R-C	C>T	1
						matR	421118	1744	H-Y	C>T	1
						matR	431620	1775	P-L	C>T	2
						matR	431758	1814	P-L	C>T	2
						matR	431833	1832	S-L	C>T	2
						mttB	432318	65	P-L	C>T	2
						mttB	432342	103	R-W	C>T	1
						mttB	432360	139	R-C	C>T	1
						mttB	432363	151	P-S	C>T	1
						mttB	432400	167	S-F	C>T	2
						mttB	432402	170	P-L	C>T	2
						mttB	432411	217	R-C	C>T	1
						mttB	432420	241	P-S	C>T	1
						mttB	432429	301	H-Y	C>T	1
						mttB	432438	367	L-F	C>T	1
						mttB	432477	385	R-C	C>T	1
						mttB	432486	511	H-Y	C>T	1
						mttB	432490	536	S-L	C>T	2
						mttB	432576	544	P-S	C>T	1
						mttB	432601	580	R-C	C>T	1
						mttB	432628	649	P-S	C>T	1
						mttB	432720	743	S-F	C>T	2
						nad1	432721	215	S-F	C>T	2
						nad1	432735	265	R-W	C>T	1
						nad1	432742	308	P-L	C>T	2
						nad1	432750	376	R-W	C>T	1
						nad1	432760	436	P-S	C>T	1
						nad1	432765	490	P-S	C>T	1
						nad1	432777	493	R-C	C>T	1
						nad1	432786	536	S-F	C>T	2
						nad1	432834	635	S-L	C>T	2
						nad1	432843	680	S-F	C>T	2
						nad1	432886	689	S-F	C>T	2
						nad1	441397	731	P-L	C>T	2
						nad1	441435	740	S-L	C>T	2
						nad1	441471	746	S-F	C>T	2
						nad1	441483	749	P-L	C>T	2
						nad1	441499	761	P-L	C>T	2
						nad1	441502	808	R-W	C>T	1
						nad1	441549	904	R-W	C>T	1
						nad1	441573	934	R-W	C>T	1
						nad2	441633	26	S-F	C>T	2
						nad2	441699	242	S-F	C>T	2
						nad2	441717	266	S-F	C>T	2
						nad2	441843	287	P-L	C>T	2
						nad2	441868	298	R-C	C>T	1
						nad2	441876	325	H-Y	C>T	1
						nad2	441912	332	S-L	C>T	2
						nad2	441981	359	P-L	C>T	2
						nad2	442075	428	S-L	C>T	2
						nad2	450143	593	S-F	C>T	2
						nad2	450154	608	S-F	C>T	2
						nad2	450181	731	S-L	C>T	2
						nad2	450190	740	S-F	C>T	2
						nad2	450197	859	H-Y	C>T	1
						nad2	450205	893	T-I	C>T	2
						nad2	450226	989	S-L	C>T	2
						nad2	450313	1058	S-L	C>T	2
						nad2	450334	1207	R-C	C>T	1
						nad2	450376	1229	A-V	C>T	2
						nad2	450398	1340	P-L	C>T	2
						nad2	450460	1388	S-L	C>T	2
						nad3	450592	44	P-L	C>T	2
						nad3	450599	62	P-L	C>T	2
						nad3	450607	80	P-L	C>T	2
						nad3	450637	146	S-F	C>T	2
						nad3	450688	208	P-F	C>T	1
						nad3	450694	209	P-F	C>T	2
						nad3	450745	215	P-L	C>T	2
						nad3	455578	230	S-F	C>T	2
						nad3	455611	247	P-S	C>T	1
						nad3	455658	251	P-L	C>T	2
						nad3	455662	266	P-L	C>T	2
						nad3	455670	275	S-F	C>T	2
						nad3	455701	317	S-F	C>T	2
						nad3	455866	344	S-L	C>T	2
						nad3	455872	349	R-W	C>T	1
						nad4	455907	74	T-I	C>T	2
						nad4	455920	107	P-L	C>T	2
						nad4	455937	154	P-S	C>T	1
						nad4	455940	158	P-L	C>T	2
						nad4	455941	166	R-W	C>T	1
						nad4	455953	197	S-F	C>T	2
						nad4	458247	362	T-I	C>T	2
						nad4	458295	368	S-F	C>T	2
						nad4	461316	403	R-C	C>T	1
						nad4	461332	416	P-L	C>T	2
						nad4	461337	433	L-F	C>T	1
						nad4	504064	436	P-F	C>T	1
						nad4	505005	437	P-F	C>T	2
						nad4	505121	449	P-L	C>T	2
						nad4	505122	1304	A-V	C>T	2
						nad4	505137	1352	P-L	C>T	2
						nad4	505161	1414	H-Y	C>T	1
						nad4	505269	1430	P-L	C>T	2
						nad4	505302	1435	R-C	C>T	1
						nad4L	505392	11	S-F	C>T	2
						nad4L	505394	17	S-L	C>T	2
						nad4L	505439	25	R-W	C>T	1
						nad4L	505476	56	P-L	C>T	2
						nad4L	505488	65	S-L	C>T	2
						nad4L	505598	70	P-S	C>T	1
						nad4L	505638	80	S-L	C>T	2
						nad4L	508073	101	S-L	C>T	2
						nad4L	551610	128	S-L	C>T	2
						nad4L	551622	158	S-L	C>T	2
						nad4L	551624	167	P-L	C>T	2
						nad4L	551675	200	S-L	C>T	2
						nad4L	551691	251	S-F	C>T	2
						nad5	551694	155	P-L	C>T	2
						nad5	551718	245	P-L	C>T	2
						nad5	551723	361	P-F	C>T	1
						nad5	551727	362	P-F	C>T	2
						nad5	551775	377	P-L	C>T	2
						nad5	551877	401	S-F	C>T	2
						nad5	551963	509	P-L	C>T	2
						nad5	551978	542	P-L	C>T	2
						nad5	552192	632	S-F	C>T	2
						nad5	552276	634	R-C	C>T	1
						nad5	553661	679	L-F	C>T	1
						nad5	553682	716	S-L	C>T	2
						nad5	553837	728	S-L	C>T	2
						nad5	576179	838	P-S	C>T	1
						nad5	576186	878	T-M	C>T	2
						nad5	605871	1313	S-L	C>T	2
						nad5	605919	1472	P-L	C>T	2
						nad5	606030	1532	T-I	C>T	2
						nad5	607550	1550	P-L	C>T	2
						nad5	607699	1562	S-L	C>T	2
						nad5	607768	1571	S-F	C>T	2
						nad5	607864	1940	S-L	C>T	2
						nad6	607898	7	L-F	C>T	1
						nad6	608017	83	S-L	C>T	2
						nad6	608026	95	P-L	C>T	2
						nad6	610672	103	R-C	C>T	1
						nad6	610687	161	P-L	C>T	2
						nad6	626411	169	H-Y	C>T	1
						nad6	626461	191	S-L	C>T	2
						nad6	626504	446	S-F	C>T	2
						nad6	626572	463	P-S	C>T	1
						nad6	646290	569	S-F	C>T	2
						rpl5	646302	47	P-L	C>T	2
						rpl5	646307	59	P-L	C>T	2
						rpl5	646335	64	H-Y	C>T	1
						rpl5	646415	92	S-L	C>T	2
						rpl5	646761	172	R-C	C>T	1
						rpl5	646764	518	P-L	C>T	2
						rpl5	648551	521	P-L	C>T	2
						rpl10	648611	101	S-L	C>T	2
						rpl10	648719	239	S-L	C>T	2
						rpl10	648731	314	S-L	C>T	2
						rps7	648758	332	S-L	C>T	2
						rps12	648791	71	S-L	C>T	2
						rps12	648852	100	R-C	C>T	1
						rps12	649001	104	P-L	C>T	2
						rps12	649113	196	H-Y	C>T	1
						rps12	649241	221	S-L	C>T	2
						rps12	649286	269	S-L	C>T	2
						rps13	649341	26	S-L	C>T	2
						rps13	649347	56	S-L	C>T	2
						rps13	649415	100	R-C	C>T	1
						rps13	649448	287	S-L	C>T	2
						sdh3	649517	67	P-S	C>T	1
						sdh3	649557	74	S-F	C>T	2
