# Supplementary material for: Exploring the RNA Editing Events and Their Potential Regulatory Roles in Tea Plant (Camellia sinensis L.)
Source: Int J Mol Sci. 2022 Nov 7;23(21):13640. doi: 10.3390/ijms232113640 (PMC9654872; doi:10.3390/ijms232113640)
Supplement: Supplementary file 1 [file ijms-23-13640-s001.zip › Table S3.xlsx]

## Sheet: Sheet1
Table S3. RNA editing sites in chloroplasts and mitochondria by RES-Scanner
chloroplast			mitochondria
Genome position	Editing type	Annotation	Genome position	Editing type	Annotation
2313	C->T	matK	54812	C->T	atp9
2313	C->T	matK	54842	G->A	atp9
2846	G->A	matK	54842	C->T	atp9
2846	C->T	matK	54873	C->T	atp9
3102	C->T	matK	54874	C->T	atp9
3289	G->A	matK	54882	C->T	atp9
4576	C->T		54882	G->A	atp9
5708	G->A		54884	C->T	atp9
5708	C->T		54926	G->A	atp9
8903	A->T	psbI	54926	C->T	atp9
9121	C->T	tRNA-Ser	54974	C->T	atp9
9121	G->A	tRNA-Ser	54974	G->A	atp9
11605	C->T	atpA	54983	G->A	atp9
11605	G->A	atpA	61663	C->A
11728	C->T	atpA	65274	G->A
11728	G->A	atpA	65274	C->T
13757	G->A		65276	C->T
13757	C->T		65276	G->A
16126	A->G	atpI	65286	C->T
16126	T->C	atpI	65305	C->T
16136	C->T	atpI	65319	T->C
16136	G->A	atpI	85705	C->T	nad6
16157	G->A	atpI	85705	G->A	nad6
16157	C->T	atpI	85722	C->T	nad6
16162	T->C	atpI	85722	G->A	nad6
16162	A->G	atpI	85977	C->T	nad6
16983	C->T	rps2	86239	C->T
16983	G->A	rps2	86239	G->A
17097	C->T	rps2	87680	G->A	rps4
17097	G->A	rps2	87689	G->A	rps4
17886	G->A	rpoC2	87709	G->A	rps4
17886	C->T	rpoC2	87740	C->T	rps4
18765	C->T	rpoC2	87740	G->A	rps4
21322	G->A	rpoC2	118437	C->T
21335	G->A	rpoC2	118764	C->T
21344	C->T	rpoC2	118764	G->A
21386	T->C	rpoC2	118782	G->A
21440	C->T	rpoC2	118794	G->A
22453	C->T	rpoC1	118803	C->T
22454	G->A	rpoC1	118803	G->A
22493	G->T	rpoC1	118824	C->T
24192	G->T	rpoC1	120248	G->A
24205	G->A	rpoC1	120288	G->A
24237	G->T	rpoC1	123732	C->A	large subunit ribosomal RNA
24254	G->A	rpoC1	124095	T->C	large subunit ribosomal RNA
24531	C->T	rpoC1	124163	C->A	large subunit ribosomal RNA
24693	G->A	rpoB	124201	G->T	large subunit ribosomal RNA
24715	A->G	rpoB	124202	G->C	large subunit ribosomal RNA
24745	A->C	rpoB	124309	C->A	large subunit ribosomal RNA
25104	C->T	rpoB	124431	A->T	large subunit ribosomal RNA
25164	G->A	rpoB	124935	C->T	large subunit ribosomal RNA
25169	T->C	rpoB	125433	G->A	large subunit ribosomal RNA
25463	C->A	rpoB	125551	A->G	large subunit ribosomal RNA
25515	G->A	rpoB	125551	T->C	large subunit ribosomal RNA
25811	G->A	rpoB	125644	A->T	large subunit ribosomal RNA
27245	C->T	rpoB	125644	T->A	large subunit ribosomal RNA
27245	G->A	rpoB	125669	C->T	large subunit ribosomal RNA
33443	C->T		125692	C->A	large subunit ribosomal RNA
33443	G->A		126323	A->G	large subunit ribosomal RNA
37856	G->A	psbZ	126989	G->A	large subunit ribosomal RNA
38058	G->A		126995	G->A	large subunit ribosomal RNA
38270	G->A	tRNA-Gly	127033	A->G	large subunit ribosomal RNA
38880	G->A	rps14	127033	T->C	large subunit ribosomal RNA
38880	C->T	rps14	127046	G->A	large subunit ribosomal RNA
38949	G->A	rps14	127048	C->A	large subunit ribosomal RNA
38949	C->T	rps14	127099	A->G	large subunit ribosomal RNA
41273	A->G	psaB	138085	G->A	cox2
41362	A->G		138085	C->T	cox2
43518	G->T	psaA	138129	G->A	cox2
43548	C->G	psaA	138129	C->T	cox2
44277	G->A		138134	C->T	cox2
44971	C->T		138195	G->A	cox2
44971	G->A		138195	C->T	cox2
48384	A->C		138246	C->T	cox2
49556	C->T		138270	C->T	cox2
49824	C->T		138270	G->A	cox2
51616	C->A	ndhJ	138283	C->T	cox2
52609	C->T	ndhK	138283	G->A	cox2
52675	G->A	ndhK	138351	G->A	cox2
52675	C->T	ndhK	138351	C->T	cox2
52958	C->T	ndhC	138366	G->A	cox2
52958	G->A	ndhC	138366	C->T	cox2
53729	C->A		138384	C->T	cox2
56344	C->T	atpB	138384	G->A	cox2
56746	C->T		138448	C->T	cox2
60526	G->A	accD	138448	G->A	cox2
60526	C->T	accD	138549	G->A	cox2
61448	G->A	psaI	138549	C->T	cox2
61448	C->T	psaI	138574	C->T	cox2
61453	G->A	psaI	138574	G->A	cox2
61453	C->T	psaI	138664	G->A	cox2
61502	G->A		138664	C->T	cox2
61502	C->T		138666	G->A	cox2
61514	G->A		138666	C->T	cox2
61514	C->T		138756	G->A	cox2
61532	C->T		138756	C->T	cox2
63533	C->T	cemA	180796	C->T
63533	G->A	cemA	180862	C->T
66101	G->A		180991	C->T	nad2
66719	C->T	psbF	182618	C->T	nad2
66797	G->A		195607	G->A
66843	G->A	psbE	196019	C->T
66843	C->T	psbE	196312	C->T	rps12
67101	C->T		196313	C->T	rps12
68347	C->T	petL	196313	G->A	rps12
69283	G->A		196328	C->T	rps12
69283	C->T		196328	G->A	rps12
69782	G->A		196376	C->T	rps12
70390	C->T		196376	G->A	rps12
70747	C->T	rps18	196401	C->T	rps12
70747	G->A	rps18	196401	G->A	rps12
72949	G->A		196431	C->T	rps12
72949	C->T		196431	G->A	rps12
73057	G->A		196438	C->T	rps12
73057	C->T		196438	G->A	rps12
74081	G->T		196493	C->T	rps12
74087	C->T		196493	G->A	rps12
74122	G->C		196497	C->T	rps12
74186	T->G		196497	G->A	rps12
74207	G->T		196526	C->T	rps12
74212	G->T		196526	G->A	rps12
74249	C->T		196572	C->T	rps12
74249	G->A		196572	G->A	rps12
74330	G->A		196581	C->T	rps12
74330	C->T		196653	C->T	nad3
74395	G->A		196653	G->A	nad3
74395	C->T		196658	C->T	nad3
74425	G->A	clpP	196658	G->A	nad3
74425	C->T	clpP	196685	C->T	nad3
74433	G->A	clpP	196772	C->T	nad3
74433	C->T	clpP	196787	C->T	nad3
74455	G->A	clpP	196787	G->A	nad3
74455	C->T	clpP	196793	C->T	nad3
74561	G->A		196793	G->A	nad3
74561	C->T		196794	C->T	nad3
74633	G->T		196794	G->A	nad3
75335	G->A	psbB	196856	G->A	nad3
75335	C->T	psbB	196856	C->T	nad3
78764	G->A	petB	196922	G->A	nad3
78764	C->T	petB	196922	C->T	nad3
79547	C->T		196940	G->A	nad3
80423	C->T		196940	C->T	nad3
81234	C->T	rpoA	196941	G->A	nad3
81234	G->A	rpoA	196941	C->T	nad3
82841	C->T	rps8	196958	G->A	nad3
85877	C->T	rps3	196958	C->T	nad3
86319	G->A	rpl22	196997	G->A	nad3
86319	C->T	rpl22	196997	C->T	nad3
114736	G->A	ndhF	197320	C->T
114736	C->T	ndhF	240545	G->A
116198	C->T		254585	G->A
118369	C->T	ndhD	254585	C->T
118792	C->T	ndhD	254588	C->T
118801	G->A	ndhD	254588	G->A
118801	C->T	ndhD	254606	G->T
119005	C->T	ndhD	254606	C->A
119296	C->T	ndhD	271978	G->A
119296	G->A	ndhD	271978	C->T
119677	G->A	ndhD	271990	G->A
120021	C->T	psaC	271997	G->A
122319	C->T		272008	C->T
122365	G->A		272008	G->A
122365	C->T		272083	G->A
123140	T->G		272104	G->A
123141	G->T		272104	C->T
123143	T->A		272151	G->A
124182	C->T	ndhA	272151	C->T
124182	G->A	ndhA	272163	C->T
124958	C->A	ndhH	272163	G->A
125201	C->T	ndhH	272166	C->T
125201	G->A	ndhH	272166	G->A
126708	C->G	ycf1	272172	C->T
128378	G->A	ycf1	272172	G->A
129755	C->T	ycf1	272181	G->A
129755	G->A	ycf1	272195	C->T
			272195	G->A
			272840	G->A	matR
			272840	C->T	matR
			272858	G->A	matR
			272859	C->T	matR
			272859	G->A	matR
			272897	G->A	matR
			272897	C->T	matR
			272950	G->A	matR
			272964	G->A	matR
			272984	C->T	matR
			272984	G->A	matR
			273004	G->A	matR
			273004	C->T	matR
			273005	C->T	matR
			273005	G->A	matR
			273139	G->A	matR
			273139	C->T	matR
			273142	G->A	matR
			273142	C->T	matR
			274189	C->T	matR
			274259	C->T	matR
			274259	G->A	matR
			274346	C->T	matR
			274346	G->A	matR
			274418	C->T	matR
			274418	G->A	matR
			274525	C->T	matR
			274525	G->A	matR
			274629	C->T	matR
			274640	C->T	matR
			274640	G->A	matR
			275700	C->T
			275700	G->A
			295880	G->A	ccmFn
			297140	G->A	ccmFn
			297157	G->A	ccmFn
			297172	G->A	ccmFn
			297329	G->A	ccmFn
			297355	C->T	ccmFn
			320759	G->A	ccmC
			320791	G->A	ccmC
			320791	C->T	ccmC
			320809	C->T	ccmC
			320809	G->A	ccmC
			320906	C->T	ccmC
			320906	G->A	ccmC
			320911	C->T	ccmC
			320911	G->A	ccmC
			320929	C->T	ccmC
			320929	G->A	ccmC
			320957	C->T	ccmC
			320975	C->T	ccmC
			320975	G->A	ccmC
			320987	C->T	ccmC
			321014	C->T	ccmC
			321036	C->T	ccmC
			321085	C->T	ccmC
			321111	G->A
			321825	G->A
			321825	C->T
			323099	G->A	atp4
			323099	C->T	atp4
			323109	G->A	atp4
			323109	C->T	atp4
			323120	G->A	atp4
			323120	C->T	atp4
			323264	C->T	atp4
			323264	G->A	atp4
			323267	C->T	atp4
			323267	G->A	atp4
			323288	G->A	atp4
			323300	C->T	atp4
			323300	G->A	atp4
			323377	C->T	atp4
			323397	C->T	atp4
			323397	G->A	atp4
			323426	C->T	atp4
			323444	C->T	atp4
			323576	C->T
			323722	G->A	nad4l
			323722	C->T	nad4l
			323773	G->A	nad4l
			323806	G->A	nad4l
			323815	G->A	nad4l
			323962	G->A	nad4l
			324001	G->A
			373299	G->A
			373359	G->A
			374349	G->A
			374349	C->T
			375156	C->T
			375159	C->T
			375167	G->A
			395135	C->T	atp1
			395135	G->A	atp1
			395315	G->A	atp1
			396108	C->T	atp1
			396108	G->A	atp1
			396247	C->T	atp1
			396247	G->A	atp1
			396285	C->T	atp1
			396285	G->A	atp1
			396361	C->T	atp1
			396361	G->A	atp1
			396484	C->T	atp1
			398024	C->A
			398024	G->T
			398041	G->A
			398044	G->A
			398047	G->A
			431420	G->A
			431602	G->A	rpl10
			431602	C->T	rpl10
			431620	G->A	rpl10
			431620	C->T	rpl10
			431758	C->T	rpl10
			431758	G->A	rpl10
			431833	G->A	rpl10
			431833	C->T	rpl10
			450226	C->T	atp6
			450273	G->A	atp6
			450313	G->A	atp6
			450313	C->T	atp6
			450334	G->A	atp6
			450334	C->T	atp6
			450376	G->A	atp6
			450376	C->T	atp6
			450398	G->A	atp6
			450398	C->T	atp6
			450401	G->A	atp6
			450401	C->T	atp6
			450460	C->T	atp6
			450460	G->A	atp6
			450592	G->A	atp6
			450599	G->A	atp6
			450607	G->A	atp6
			450688	G->A	atp6
			450694	G->A	atp6
			450745	C->T	atp6
			450745	G->A	atp6
			450824	C->T	atp6
			450824	G->A	atp6
			451650	G->A
			455533	C->T	nad4
			455533	G->A	nad4
			455578	C->T	nad4
			455581	C->T	nad4
			455581	G->A	nad4
			455611	C->T	nad4
			455670	C->T	nad4
			455670	G->A	nad4
			455701	C->T	nad4
			456398	G->A
			457213	G->A
			457213	C->T
			458247	C->T	nad4
			458247	G->A	nad4
			458295	C->T	nad4
			458693	G->A
			458693	C->T
			461294	C->T
			461294	G->A
			461316	G->A	nad4
			461316	C->T	nad4
			461332	C->T	nad4
			461332	G->A	nad4
			461337	C->T	nad4
			461337	G->A	nad4
			499146	A->T
			499396	G->C
			499396	C->G
			505121	G->A	nad5
			505122	G->A	nad5
			505123	A->G	nad5
			505137	G->A	nad5
			505161	G->A	nad5
			505269	G->A	nad5
			505269	C->T	nad5
			505302	G->A	nad5
			505302	C->T	nad5
			505311	G->A	nad5
			505311	C->T	nad5
			505392	G->A	nad5
			505392	C->T	nad5
			505394	G->A	nad5
			505394	C->T	nad5
			505598	G->A	nad5
			505638	C->T	nad5
			506073	G->A	nad5
			506479	C->T
			506479	G->A
			506667	C->T	orf115b
			506667	G->A	orf115b
			506891	A->C
			506891	T->G
			549691	A->G
			552945	G->A
			553682	C->T	ccmFc
			575923	C->T
			576239	G->A	sdh3
			576239	C->T	sdh3
			576268	C->T	sdh3
			576268	G->A	sdh3
			576316	C->T	sdh3
			576316	G->A	sdh3
			576396	G->A	sdh3
			605912	G->A	nad2
			605912	C->T	nad2
			605919	G->A	nad2
			605919	C->T	nad2
			605920	G->A	nad2
			605920	C->T	nad2
			605928	G->A	nad2
			605928	C->T	nad2
			606381	C->T
			606381	G->A
			607401	G->A
			607401	C->T
			607699	G->A	nad2
			607768	C->T	nad2
			607768	G->A	nad2
			607798	G->A	nad2
			607864	G->A	nad2
			607868	G->A	nad2
			607898	G->A	nad2
			608017	C->T	nad2
			608026	G->A	nad2
			608038	G->A	nad2
			608038	C->T	nad2
			608703	C->T
			608729	C->T
			610283	G->A
			610283	C->T
			610304	C->T
			610304	G->A
			610547	G->T
			610918	G->A
			610918	C->T
			611151	G->A
			611151	C->T
			626411	G->A	nad1
			626411	C->T	nad1
			626461	G->A	nad1
			626461	C->T	nad1
			626503	G->A	nad1
			626503	C->T	nad1
			626504	G->A	nad1
			626504	C->T	nad1
			626572	G->A	nad1
			626572	C->T	nad1
			646693	C->T	rpl5
			646693	G->A	rpl5
			646761	C->T	rpl5
			646764	C->T	rpl5
			647079	C->T	rps14
			647079	G->A	rps14
			648486	G->A	cob
			648551	G->A	cob
			648611	G->A	cob
			648719	G->A	cob
			648731	C->T	cob
			648731	G->A	cob
			648758	C->T	cob
			648758	G->A	cob
			648791	C->T	cob
			648791	G->A	cob
			648852	G->A	cob
			648852	C->T	cob
			649001	C->T	cob
			649001	G->A	cob
			649113	G->A	cob
			649341	C->T	cob
			649347	C->T	cob
			649415	G->A	cob
			649448	G->A	cob
			649517	G->A	cob
			649517	C->T	cob
			649531	C->T	cob
			649557	G->A	cob
			649557	C->T	cob
			649593	C->T	cob
