# Supplementary material for: Exploring the RNA Editing Events and Their Potential Regulatory Roles in Tea Plant (Camellia sinensis L.)
Source: Int J Mol Sci. 2022 Nov 7;23(21):13640. doi: 10.3390/ijms232113640 (PMC9654872; doi:10.3390/ijms232113640)
Supplement: Supplementary file 1 [file ijms-23-13640-s001.zip › Table S4.xlsx]

## Sheet: Sheet1
Table S4. RNA editing impact on protein transmembrane domains, RNA secondary structures, protein secondary structures
Genes containing RNA editing sites	RNA secondary structure	Protein transmembrane domain	Protein secondary structure
psbE	+	-	+
psbF	-	-	-
rpoA	+	-	+
psbZ	+	-	+
ndhF	+	-	+
matK	-	-	+
ndhD	+	-	+
ndhB	+	-	+
atpF	-	-	-
atpA	-	-	+
rps2	-	-	+
ndhC	+	-	-
rps18	+	-	+
petB	-	-	+
rps8	-	-	-
ndhH	+	-	+
ndhK	-	-	-
psaI	-	-	-
rpoC2	+	-	+
ndhA	+	-	+
atpB	-	-	+
rpoC1	-	-	+
atp4	+	-	+
atp6	+	-	+
atp9	+	-	+
ccmB	+	-	+
cox2	+	-	+
nad3	+	-	+
nad6	+	-	+
orf115b	+	-	+
rpl10	+	-	+
rpl5	+	-	+
rps12	+	-	+
rps14	+	-	+
ndh3	+	-	+
rps1	+	-	+
rps7	-	-	+
atp1	+	-	+
ccmFc	+	-	+
ccmFn	+	-	+
cob	+	-	+
matR	+	-	+
nad5	+	-	+
nad41	+	-	-
“+”representative the structures were affected by RNA editing
“-”representative the structures were not affected by RNA editing
