# Supplementary material for: Exploring the RNA Editing Events and Their Potential Regulatory Roles in Tea Plant (Camellia sinensis L.)
Source: Int J Mol Sci. 2022 Nov 7;23(21):13640. doi: 10.3390/ijms232113640 (PMC9654872; doi:10.3390/ijms232113640)
Supplement: Supplementary file 1 [file ijms-23-13640-s001.zip › Table S5.xlsx]

## Sheet: Sheet1
Table S5. PPR code and probability score in the PLS-PPR of tea plants
Unigene ID	Gene name	Protein length	C-terminal	No. of motifs	PPR code				Probability score
					2nd	5th	last	2nd, 5th, last	A	C	G	U
TEA010372.1	CsPPR7	752	E2	1	49	52	78	VNN	0.159753	0.422525	0.0863316	0.33139
				2	80	83	109	VND	0.0915966	0.198795	0.0806164	0.628992
				3	111	114	141	FSN	0.58017	0.0864832	0.0654684	0.267878
				4	143	146	172	VND	0.0915966	0.198795	0.0806164	0.628992
				5	174	177	203	VND	0.0915966	0.198795	0.0806164	0.628992
				6	205	208	234	VNN	0.159753	0.422525	0.0863316	0.33139
				7	236	239	265	VVN	0.426343	0.161456	0.108135	0.304067
				8	267	270	296	VND	0.0915966	0.198795	0.0806164	0.628992
				9	298	301	327	VTN	0.71082	0.11739	0.0778614	0.0939285
				10	329	332	358	GTD	0.14601	0.064726	0.646665	0.142599
				11	360	363	389	VNN	0.159753	0.422525	0.0863316	0.33139
				12	391	394	420	VNN	0.159753	0.422525	0.0863316	0.33139
				13	422	425	455	VND	0.0915966	0.198795	0.0806164	0.628992
				14	457	460	491	SVD	0.271123	0.173636	0.130355	0.424886
				15	493	496	522	FND	0.256814	0.154636	0.0785667	0.509983
				16	524	527	557	IND	0.114257	0.114207	0.0767909	0.694746
				17	559	562	593	VVL	0.346058	0.150072	0.0915474	0.412322
				18	595	598	625	EAN	0.497597	0.0847437	0.128858	0.288801
				19	627	630	660	GGK	0.281454	0.0899767	0.299264	0.329305
				20	662	665	694	SVK	0.346058	0.150072	0.0915474	0.412322
TEA015671.1	CsPPR22	777	DYW	1	61	64	90	VNS	0.114511	0.709302	0.0421855	0.134001
				2	92	95	121	VND	0.0915966	0.198795	0.0806164	0.628992
				3	123	126	152	VND	0.0915966	0.198795	0.0806164	0.628992
				4	154	157	183	VNN	0.159753	0.422525	0.0863316	0.33139
				5	185	188	214	INE	0.0981559	0.327225	0.225146	0.349472
				6	216	219	245	VND	0.0915966	0.198795	0.0806164	0.628992
				7	247	250	276	VND	0.0915966	0.198795	0.0806164	0.628992
				8	278	281	307	FTN	0.591919	0.0472627	0.0499482	0.31087
				9	309	312	338	VNN	0.159753	0.422525	0.0863316	0.33139
				10	340	343	369	SND	0.0700463	0.0450075	0.0475649	0.837381
				11	371	374	404	IAN	0.497597	0.0847437	0.128858	0.288801
				12	406	409	439	STG	0.626468	0.0630691	0.172315	0.138148
				13	441	444	470	FND	0.256814	0.154636	0.0785667	0.509983
				14	472	475	505	VND	0.0915966	0.198795	0.0806164	0.628992
				15	543	546	573	KTD	0.0981559	0.0630691	0.700627	0.138148
				16	575	578	607	AGN	0.503633	0.0844616	0.0426698	0.369235
				17	609	612	641	GVK	0.346058	0.150072	0.0915474	0.412322
				18	643	646	777	PSW	0.410663	0.113786	0.217831	0.25772
TEA016976.1	CsPPR24	777	DYW	1	27	30	57	FND	0.256814	0.154636	0.0785667	0.509983
				2	90	93	119	RTN	0.566556	0.0532461	0.194468	0.185729
				3	121	124	150	VNN	0.159753	0.422525	0.0863316	0.33139
				4	152	155	181	VNN	0.159753	0.422525	0.0863316	0.33139
				5	183	186	216	VMD	0.089389	0.224103	0.394033	0.292475
				6	218	221	251	SVD	0.271123	0.173636	0.130355	0.424886
				7	253	256	282	VTN	0.71082	0.11739	0.0778614	0.0939285
				8	284	287	313	FTS	0.399478	0.187965	0.119833	0.292723
				9	315	318	344	STN	0.520806	0.0630691	0.277978	0.138148
				10	346	349	375	VNN	0.159753	0.422525	0.0863316	0.33139
				11	377	380	410	AAS	0.41454	0.0532461	0.0562716	0.475942
				12	412	415	445	STN	0.520806	0.0630691	0.277978	0.138148
				13	447	450	476	YND	0.0621242	0.214539	0.0945721	0.628764
				14	478	481	507	VND	0.0915966	0.198795	0.0806164	0.628992
				15	609	612	642	VND	0.0915966	0.198795	0.0806164	0.628992
				16	644	647	678	ILL	0.221949	0.221995	0.0411741	0.514882
				17	680	683	710	HTD	0.309481	0.0630691	0.489303	0.138148
				18	712	715	744	VEK	0.25	0.25	0.25	0.25
				19	746	749	778	GVR	0.0981559	0.0630691	0.0666528	0.772122
				20	780	783	914	QSW	0.410663	0.113786	0.217831	0.25772
TEA000802.1	CsPPR32	1102	E+	1	89	92	122	TTY	0.449355	0.0697129	0.331829	0.149103
				2	124	127	153	VND	0.0915966	0.198795	0.0806164	0.628992
				3	155	158	188	VTN	0.71082	0.11739	0.0778614	0.0939285
				4	190	193	223	FSN	0.58017	0.0864832	0.0654684	0.267878
				5	225	228	254	YSN	0.679299	0.1159	0.0666528	0.138148
				6	256	259	289	VNT	0.0644279	0.661858	0.0437498	0.229965
				7	291	294	324	YSV	0.410663	0.113786	0.217831	0.25772
				8	326	329	355	FND	0.256814	0.154636	0.0785667	0.509983
				9	357	360	390	VNN	0.159753	0.422525	0.0863316	0.33139
				10	392	395	425	ILE	0.0828682	0.191443	0.0562716	0.669418
				11	427	430	457	SVT	0.432792	0.0499517	0.0527901	0.464466
				12	459	462	491	AGD	0.0863612	0.103718	0.547016	0.262904
				13	493	496	525	GVK	0.346058	0.150072	0.0915474	0.412322
				14	527	530	1102	PSP	0.410663	0.113786	0.217831	0.25772
TEA019182.1	CsPPR33	668	E2	1	55	58	84	RNN	0.13155	0.359876	0.172228	0.336346
				2	86	89	115	VND	0.0915966	0.198795	0.0806164	0.628992
				3	117	120	149	VND	0.0915966	0.198795	0.0806164	0.628992
				4	151	154	180	VNN	0.159753	0.422525	0.0863316	0.33139
				5	182	185	211	VND	0.0915966	0.198795	0.0806164	0.628992
				6	250	253	292	HNN	0.13155	0.359876	0.172228	0.336346
				7	294	297	323	VND	0.0915966	0.198795	0.0806164	0.628992
				8	325	328	354	FND	0.256814	0.154636	0.0785667	0.509983
				9	356	359	385	LNN	0.0981559	0.0630691	0.38364	0.455135
				10	387	390	420	VND	0.0915966	0.198795	0.0806164	0.628992
				11	422	425	454	HSD	0.167192	0.111174	0.479736	0.241898
				12	456	459	486	PND	0.0777411	0.227477	0.0922402	0.602542
				13	488	491	521	INT	0.0871255	0.630232	0.0912528	0.19139
				14	523	526	557	IIR	0.131282	0.221931	0.175628	0.471159
				15	559	562	589	EAD	0.0981559	0.0630691	0.594965	0.24381
				16	591	594	623	AGS	0.281454	0.0899767	0.299264	0.329305
				17	625	628	657	AVK	0.346058	0.150072	0.0915474	0.412322
TEA031910.1	CsPPR35	703	DYW	1	48	51	77	VNN	0.159753	0.422525	0.0863316	0.33139
				2	79	82	108	VNN	0.159753	0.422525	0.0863316	0.33139
				3	110	113	139	VTN	0.71082	0.11739	0.0778614	0.0939285
				4	141	144	170	ITD	0.0644279	0.117372	0.499598	0.318602
				5	172	175	201	VTN	0.71082	0.11739	0.0778614	0.0939285
				6	203	206	232	ITN	0.717509	0.0790148	0.0785136	0.124963
				7	234	237	263	VTS	0.382294	0.0532461	0.12537	0.43909
				8	265	268	294	VND	0.0915966	0.198795	0.0806164	0.628992
				9	296	299	329	GSN	0.701306	0.0675978	0.0428504	0.188245
				10	331	334	364	PID	0.193179	0.0911823	0.170698	0.544941
				11	366	369	395	YSD	0.186516	0.0532461	0.53996	0.220279
				12	397	400	430	VND	0.0915966	0.198795	0.0806164	0.628992
				13	432	435	466	VVR	0.0981559	0.0630691	0.0666528	0.772122
				14	468	471	498	EAD	0.0981559	0.0630691	0.594965	0.24381
				15	500	503	532	IGN	0.503633	0.0844616	0.0426698	0.369235
				16	534	537	566	GIK	0.131282	0.221931	0.175628	0.471159
				17	568	571	703	GSW	0.410663	0.113786	0.217831	0.25772
TEA002457.1	CsPPR44	760	E2	1	46	49	79	SDH	0.25	0.25	0.25	0.25
				2	81	84	110	VTN	0.71082	0.11739	0.0778614	0.0939285
				3	112	115	141	VNS	0.114511	0.709302	0.0421855	0.134001
				4	143	146	172	VTN	0.71082	0.11739	0.0778614	0.0939285
				5	174	177	203	VNN	0.159753	0.422525	0.0863316	0.33139
				6	205	208	234	VNN	0.159753	0.422525	0.0863316	0.33139
				7	236	239	265	ITN	0.717509	0.0790148	0.0785136	0.124963
				8	267	270	301	VTN	0.71082	0.11739	0.0778614	0.0939285
				9	303	306	339	EID	0.193179	0.0911823	0.170698	0.544941
				10	341	344	371	RKT	0.089389	0.390769	0.144033	0.375809
				11	373	376	402	QND	0.221065	0.139619	0.0562716	0.583045
				12	404	407	534	FND	0.256814	0.154636	0.0785667	0.509983
				13	536	539	569	VNN	0.159753	0.422525	0.0863316	0.33139
				14	571	574	605	VLG	0.221949	0.221995	0.0411741	0.514882
				15	607	610	637	EIG	0.131282	0.221931	0.175628	0.471159
				16	639	642	672	AGN	0.503633	0.0844616	0.0426698	0.369235
				17	674	677	706	PVK	0.346058	0.150072	0.0915474	0.412322
TEA021212.1	CsPPR48	538	E+	1	50	53	79	VNN	0.159753	0.422525	0.0863316	0.33139
				2	81	84	110	VNN	0.159753	0.422525	0.0863316	0.33139
				3	112	115	141	ITN	0.717509	0.0790148	0.0785136	0.124963
				4	143	146	172	VND	0.0915966	0.198795	0.0806164	0.628992
				5	174	177	203	PNN	0.13155	0.359876	0.172228	0.336346
				6	205	208	239	ITN	0.717509	0.0790148	0.0785136	0.124963
				7	241	244	274	GVG	0.194507	0.35828	0.0499482	0.397264
				8	276	279	307	FSD	0.216377	0.0793849	0.537585	0.166653
				9	309	312	342	INN	0.149435	0.418265	0.0771099	0.355189
				10	344	347	378	VVR	0.0981559	0.0630691	0.0666528	0.772122
				11	380	383	410	DSS	0.410663	0.113786	0.217831	0.25772
				12	412	415	444	SGN	0.503633	0.0844616	0.0426698	0.369235
				13	446	449	478	GMK	0.118448	0.208039	0.220201	0.453312
				14	480	483	538	PST	0.410663	0.113786	0.217831	0.25772
TEA011148.1	CsPPR57	897	DYW	1	52	55	85	RDR	0.25	0.25	0.25	0.25
				2	87	90	119	HAD	0.173989	0.150753	0.380104	0.295154
				3	121	124	150	FTN	0.591919	0.0472627	0.0499482	0.31087
				4	152	155	185	YSD	0.186516	0.0532461	0.53996	0.220279
				5	187	190	220	FPE	0.0761242	0.0872032	0.169197	0.667476
				6	222	225	251	RND	0.384574	0.0472627	0.0499482	0.518215
				7	253	256	286	VNS	0.114511	0.709302	0.0421855	0.134001
				8	288	291	321	VND	0.0915966	0.198795	0.0806164	0.628992
				9	323	326	356	ITN	0.717509	0.0790148	0.0785136	0.124963
				10	358	361	391	ITD	0.0644279	0.117372	0.499598	0.318602
				11	393	396	422	LND	0.089389	0.057436	0.227366	0.625809
				12	424	427	457	YNN	0.255267	0.138714	0.467016	0.139003
				13	459	462	493	IND	0.114257	0.114207	0.0767909	0.694746
				14	495	498	528	ANN	0.0828682	0.329639	0.0562716	0.531221
				15	530	533	563	VLD	0.0981559	0.380056	0.0666528	0.455135
				16	565	568	594	SND	0.0700463	0.0450075	0.0475649	0.837381
				17	596	599	629	INN	0.149435	0.418265	0.0771099	0.355189
				18	631	634	665	GVC	0.346058	0.150072	0.0915474	0.412322
				19	667	670	697	ELD	0.194369	0.294012	0.0592154	0.452404
				20	699	702	731	SSN	0.701306	0.0675978	0.0428504	0.188245
				21	767	770	897	TSW	0.410663	0.113786	0.217831	0.25772
TEA029317.1	CsPPR78	960	E+	1	2	5	27	PLD	0.194369	0.294012	0.0592154	0.452404
				2	29	32	58	QND	0.221065	0.139619	0.0562716	0.583045
				3	60	63	93	VNN	0.159753	0.422525	0.0863316	0.33139
				4	95	98	128	FAS	0.41454	0.0532461	0.0562716	0.475942
				5	130	133	159	FGD	0.0863612	0.103718	0.547016	0.262904
				6	161	164	194	VTD	0.145694	0.0406957	0.659505	0.154106
				7	196	199	225	VVN	0.426343	0.161456	0.108135	0.304067
				8	227	230	260	VNT	0.0644279	0.661858	0.0437498	0.229965
				9	262	265	295	SGN	0.503633	0.0844616	0.0426698	0.369235
				10	297	300	326	YSN	0.679299	0.1159	0.0666528	0.138148
				11	328	331	361	VND	0.0915966	0.198795	0.0806164	0.628992
				12	363	366	396	FTN	0.591919	0.0472627	0.0499482	0.31087
				13	398	401	427	FND	0.256814	0.154636	0.0785667	0.509983
				14	429	432	462	VND	0.0915966	0.198795	0.0806164	0.628992
				15	464	467	497	VAS	0.41454	0.0532461	0.0562716	0.475942
				16	499	502	528	YSS	0.410663	0.113786	0.217831	0.25772
				17	530	533	562	VNS	0.114511	0.709302	0.0421855	0.134001
				18	564	567	598	VSD	0.373617	0.168302	0.348666	0.109415
				19	600	603	630	FVS	0.413067	0.168302	0.0527901	0.365841
				20	632	635	665	VTD	0.145694	0.0406957	0.659505	0.154106
				21	667	670	700	AVD	0.271123	0.173636	0.130355	0.424886
				22	702	705	732	LSD	0.167192	0.111174	0.479736	0.241898
				23	734	737	767	IND	0.114257	0.114207	0.0767909	0.694746
				24	769	772	803	VLR	0.221949	0.221995	0.0411741	0.514882
				25	805	808	835	DAD	0.173989	0.150753	0.380104	0.295154
				26	837	840	869	MAN	0.497597	0.0847437	0.128858	0.288801
				27	871	874	903	SVK	0.346058	0.150072	0.0915474	0.412322
				28	905	908	960	PSD	0.167192	0.111174	0.479736	0.241898
TEA000867.1	CsPPR79	650	E2	1	7	10	36	ITS	0.399478	0.187965	0.119833	0.292723
				2	70	73	101	VAD	0.0777411	0.168302	0.467016	0.286941
				3	103	106	132	VND	0.0915966	0.198795	0.0806164	0.628992
				4	134	137	163	VSN	0.670991	0.0949689	0.0638619	0.170178
				5	165	168	199	VTN	0.71082	0.11739	0.0778614	0.0939285
				6	201	204	234	TTD	0.14601	0.064726	0.646665	0.142599
				7	236	239	265	FND	0.256814	0.154636	0.0785667	0.509983
				8	267	270	296	VND	0.0915966	0.198795	0.0806164	0.628992
				9	298	301	327	VTD	0.145694	0.0406957	0.659505	0.154106
				10	329	332	362	VTN	0.71082	0.11739	0.0778614	0.0939285
				11	364	367	397	LSN	0.701306	0.0675978	0.0428504	0.188245
				12	399	402	428	SNN	0.128934	0.42177	0.102337	0.346959
				13	430	433	463	VNN	0.159753	0.422525	0.0863316	0.33139
				14	465	468	499	ILG	0.221949	0.221995	0.0411741	0.514882
				15	501	504	531	DAH	0.289349	0.129794	0.261303	0.319555
				16	533	536	565	GGN	0.503633	0.0844616	0.0426698	0.369235
				17	567	570	599	TVK	0.346058	0.150072	0.0915474	0.412322
TEA009314.1	CsPPR86	636	E2	1	22	25	51	VND	0.0915966	0.198795	0.0806164	0.628992
				2	84	87	113	VNN	0.159753	0.422525	0.0863316	0.33139
				3	115	118	144	IND	0.114257	0.114207	0.0767909	0.694746
				4	146	149	175	VTD	0.145694	0.0406957	0.659505	0.154106
				5	177	180	206	QND	0.221065	0.139619	0.0562716	0.583045
				6	208	211	237	NNC	0.116929	0.281465	0.0956023	0.506004
				7	239	242	268	RND	0.384574	0.0472627	0.0499482	0.518215
				8	270	273	299	VTD	0.145694	0.0406957	0.659505	0.154106
				9	301	304	334	TND	0.254983	0.0472627	0.0499482	0.647806
				10	336	339	369	ATF	0.449355	0.0697129	0.331829	0.149103
				11	371	374	400	AND	0.0828682	0.0532461	0.0562716	0.807614
				12	402	405	435	INN	0.149435	0.418265	0.0771099	0.355189
				13	437	440	471	IIM	0.131282	0.221931	0.175628	0.471159
				14	473	476	506	ETS	0.399478	0.187965	0.119833	0.292723
				15	508	511	540	SGN	0.503633	0.0844616	0.0426698	0.369235
				16	542	545	574	GMK	0.118448	0.208039	0.220201	0.453312
TEA033549.1	CsPPR87	1072	DYW	1	94	97	127	QLE	0.0828682	0.191443	0.0562716	0.669418
				2	129	132	158	ASS	0.410663	0.113786	0.217831	0.25772
				3	160	163	193	SND	0.0700463	0.0450075	0.0475649	0.837381
				4	195	198	229	IAS	0.41454	0.0532461	0.0562716	0.475942
				5	231	234	260	RND	0.384574	0.0472627	0.0499482	0.518215
				6	262	265	295	VVT	0.432792	0.0499517	0.0527901	0.464466
				7	297	300	330	YSE	0.410663	0.113786	0.217831	0.25772
				8	332	335	361	FND	0.256814	0.154636	0.0785667	0.509983
				9	363	366	396	VND	0.0915966	0.198795	0.0806164	0.628992
				10	398	401	431	VAD	0.0777411	0.168302	0.467016	0.286941
				11	433	436	462	IGN	0.503633	0.0844616	0.0426698	0.369235
				12	464	467	497	VNN	0.159753	0.422525	0.0863316	0.33139
				13	499	502	532	YPN	0.0981559	0.0630691	0.207536	0.631239
				14	534	537	563	YSD	0.186516	0.0532461	0.53996	0.220279
				15	565	568	598	VTD	0.145694	0.0406957	0.659505	0.154106
				16	600	603	633	ISD	0.110222	0.224103	0.394033	0.271642
				17	635	638	664	SND	0.0700463	0.0450075	0.0475649	0.837381
				18	666	669	699	INN	0.149435	0.418265	0.0771099	0.355189
				19	701	704	734	FGE	0.281454	0.0899767	0.299264	0.329305
				20	736	739	765	ENN	0.131056	0.390769	0.0606996	0.417475
				21	767	770	800	VNN	0.159753	0.422525	0.0863316	0.33139
				22	802	805	836	VVK	0.346058	0.150072	0.0915474	0.412322
				23	838	841	868	EVD	0.271123	0.173636	0.130355	0.424886
				24	870	873	902	MRD	0.309481	0.168732	0.0666528	0.455135
				25	904	907	936	AVK	0.346058	0.150072	0.0915474	0.412322
				26	938	941	1072	PSW	0.410663	0.113786	0.217831	0.25772
TEA020025.1	CsPPR89	728	E2	1	42	45	55	ECE	0.403855	0.0618527	0.165418	0.368875
				2	88	91	117	VNN	0.159753	0.422525	0.0863316	0.33139
				3	119	122	148	VTN	0.71082	0.11739	0.0778614	0.0939285
				4	150	153	183	VTN	0.71082	0.11739	0.0778614	0.0939285
				5	185	188	218	VTN	0.71082	0.11739	0.0778614	0.0939285
				6	220	223	249	SND	0.0700463	0.0450075	0.0475649	0.837381
				7	251	254	280	VTN	0.71082	0.11739	0.0778614	0.0939285
				8	282	285	315	VSN	0.670991	0.0949689	0.0638619	0.170178
				9	317	320	350	SPY	0.0761242	0.0872032	0.169197	0.667476
				10	352	355	381	FSN	0.58017	0.0864832	0.0654684	0.267878
				11	383	386	412	VND	0.0915966	0.198795	0.0806164	0.628992
				12	414	417	447	VNN	0.159753	0.422525	0.0863316	0.33139
				13	449	452	482	SSD	0.089389	0.140769	0.394033	0.375809
				14	484	487	513	FTN	0.591919	0.0472627	0.0499482	0.31087
				15	515	518	549	ITN	0.717509	0.0790148	0.0785136	0.124963
				16	551	554	585	LSN	0.701306	0.0675978	0.0428504	0.188245
				17	587	590	617	RTD	0.177229	0.099099	0.568311	0.155361
				18	619	622	651	NSK	0.410663	0.113786	0.217831	0.25772
				19	653	656	685	GVK	0.346058	0.150072	0.0915474	0.412322
TEA033626.1	CsPPR90	681	E2	1	6	9	40	HAA	0.289349	0.129794	0.261303	0.319555
				2	42	45	71	TNN	0.0981559	0.274394	0.207536	0.419914
				3	73	76	102	FNN	0.13336	0.211041	0.366277	0.289322
				4	104	107	133	FNN	0.13336	0.211041	0.366277	0.289322
				5	135	138	171	IND	0.114257	0.114207	0.0767909	0.694746
				6	173	176	206	FAD	0.172722	0.286603	0.414866	0.125809
				7	208	211	237	VSD	0.373617	0.168302	0.348666	0.109415
				8	239	242	268	FSC	0.497458	0.122344	0.0908208	0.289377
				9	270	273	303	VND	0.0915966	0.198795	0.0806164	0.628992
				10	305	308	338	SAD	0.173989	0.150753	0.380104	0.295154
				11	340	343	369	ISD	0.110222	0.224103	0.394033	0.271642
				12	371	374	400	INS	0.168598	0.415277	0.0666528	0.349472
				13	402	405	435	IND	0.114257	0.114207	0.0767909	0.694746
				14	437	440	470	FAD	0.172722	0.286603	0.414866	0.125809
				15	472	475	501	ITD	0.0644279	0.117372	0.499598	0.318602
				16	503	506	536	VNT	0.0644279	0.661858	0.0437498	0.229965
				17	538	541	572	VTG	0.626468	0.0630691	0.172315	0.138148
				18	574	577	604	ESD	0.167192	0.111174	0.479736	0.241898
				19	606	609	638	SSN	0.701306	0.0675978	0.0428504	0.188245
				20	640	643	672	GVK	0.346058	0.150072	0.0915474	0.412322
TEA006781.1	CsPPR96	602	E2	1	58	61	87	YND	0.0621242	0.214539	0.0945721	0.628764
				2	89	92	118	VNN	0.159753	0.422525	0.0863316	0.33139
				3	120	123	149	VNN	0.159753	0.422525	0.0863316	0.33139
				4	151	154	180	ANN	0.0828682	0.329639	0.0562716	0.531221
				5	182	185	211	ITN	0.717509	0.0790148	0.0785136	0.124963
				6	213	216	242	VTN	0.71082	0.11739	0.0778614	0.0939285
				7	244	247	273	VTD	0.145694	0.0406957	0.659505	0.154106
				8	275	278	308	VND	0.0915966	0.198795	0.0806164	0.628992
				9	310	313	343	SVH	0.346058	0.150072	0.0915474	0.412322
				10	345	348	374	SNN	0.128934	0.42177	0.102337	0.346959
				11	376	379	409	VND	0.0915966	0.198795	0.0806164	0.628992
				12	411	414	445	ILR	0.221949	0.221995	0.0411741	0.514882
				13	447	450	477	KAD	0.173989	0.150753	0.380104	0.295154
				14	479	482	511	GGN	0.503633	0.0844616	0.0426698	0.369235
				15	513	516	545	GIK	0.131282	0.221931	0.175628	0.471159
TEA024417.1	CsPPR97	663	E2	1	6	9	40	HAA	0.289349	0.129794	0.261303	0.319555
				2	42	45	71	TNN	0.0981559	0.274394	0.207536	0.419914
				3	73	76	102	FNN	0.13336	0.211041	0.366277	0.289322
				4	104	107	133	FNN	0.13336	0.211041	0.366277	0.289322
				5	135	138	171	IND	0.114257	0.114207	0.0767909	0.694746
				6	173	176	206	FAD	0.172722	0.286603	0.414866	0.125809
				7	208	211	237	VSD	0.373617	0.168302	0.348666	0.109415
				8	239	242	268	FSC	0.497458	0.122344	0.0908208	0.289377
				9	270	273	303	VND	0.0915966	0.198795	0.0806164	0.628992
				10	305	308	338	SAD	0.173989	0.150753	0.380104	0.295154
				11	340	343	369	ISD	0.110222	0.224103	0.394033	0.271642
				12	371	374	400	INS	0.168598	0.415277	0.0666528	0.349472
				13	402	405	435	IND	0.114257	0.114207	0.0767909	0.694746
				14	437	440	470	FAD	0.172722	0.286603	0.414866	0.125809
				15	472	475	501	ITD	0.0644279	0.117372	0.499598	0.318602
				16	503	506	536	VNT	0.0644279	0.661858	0.0437498	0.229965
				17	538	541	572	VTG	0.626468	0.0630691	0.172315	0.138148
				18	574	577	604	ESD	0.167192	0.111174	0.479736	0.241898
				19	606	609	638	SSN	0.701306	0.0675978	0.0428504	0.188245
				20	640	643	663	GVI	0.346058	0.150072	0.0915474	0.412322
TEA006727.1	CsPPR98	670	E2	1	36	39	65	FNN	0.13336	0.211041	0.366277	0.289322
				2	67	70	100	FTL	0.661689	0.0630691	0.0666528	0.208589
				3	102	105	135	FCD	0.196091	0.109127	0.309216	0.385566
				4	137	140	166	IND	0.114257	0.114207	0.0767909	0.694746
				5	168	171	197	VNN	0.159753	0.422525	0.0863316	0.33139
				6	199	202	228	ITD	0.0644279	0.117372	0.499598	0.318602
				7	230	233	259	AND	0.0828682	0.0532461	0.0562716	0.807614
				8	261	264	290	GNN	0.13155	0.359876	0.172228	0.336346
				9	292	295	321	AAN	0.497597	0.0847437	0.128858	0.288801
				10	323	326	356	VSD	0.373617	0.168302	0.348666	0.109415
				11	358	361	391	TLN	0.589389	0.057436	0.0606996	0.292475
				12	393	396	422	RTD	0.177229	0.099099	0.568311	0.155361
				13	424	427	457	LSD	0.167192	0.111174	0.479736	0.241898
				14	459	462	493	VLS	0.27426	0.239173	0.172315	0.314252
				15	495	498	525	KAT	0.289349	0.129794	0.261303	0.319555
				16	527	530	559	VGN	0.520806	0.0630691	0.0666528	0.349472
				17	561	564	593	GIK	0.131282	0.221931	0.175628	0.471159
TEA028850.1	CsPPR102	931	E2	1	17	20	50	SHD	0.25	0.25	0.25	0.25
				2	52	55	81	TTP	0.449355	0.0697129	0.331829	0.149103
				3	83	86	116	IND	0.114257	0.114207	0.0767909	0.694746
				4	118	121	151	YTD	0.393342	0.0499517	0.407841	0.148865
				5	153	156	182	FTD	0.089389	0.112992	0.449588	0.348031
				6	220	223	251	VLP	0.221949	0.221995	0.0411741	0.514882
				7	253	256	282	AND	0.0828682	0.0532461	0.0562716	0.807614
				8	284	287	317	VGN	0.520806	0.0630691	0.0666528	0.349472
				9	319	322	352	VVD	0.221065	0.191443	0.194468	0.393024
				10	354	357	383	LTD	0.089389	0.057436	0.727366	0.125809
				11	385	388	418	ISN	0.756056	0.057436	0.0606996	0.125809
				12	420	423	453	VAD	0.0777411	0.168302	0.467016	0.286941
				13	455	458	484	STG	0.626468	0.0630691	0.172315	0.138148
				14	486	489	519	VND	0.0915966	0.198795	0.0806164	0.628992
				15	521	524	554	GVD	0.271123	0.173636	0.130355	0.424886
				16	556	559	586	HND	0.229065	0.202772	0.205457	0.362706
				17	588	591	621	VNN	0.159753	0.422525	0.0863316	0.33139
				18	623	626	656	VVN	0.426343	0.161456	0.108135	0.304067
				19	658	661	687	IND	0.114257	0.114207	0.0767909	0.694746
				20	689	692	722	IND	0.114257	0.114207	0.0767909	0.694746
				21	724	727	758	VVD	0.221065	0.191443	0.194468	0.393024
				22	760	763	790	EAD	0.0981559	0.0630691	0.594965	0.24381
				23	792	795	824	GGN	0.503633	0.0844616	0.0426698	0.369235
				24	826	829	858	AVK	0.346058	0.150072	0.0915474	0.412322
TEA016226.1	CsPPR106	877	E+	1	36	39	69	KST	0.497458	0.122344	0.0908208	0.289377
				2	71	74	100	FND	0.256814	0.154636	0.0785667	0.509983
				3	102	105	131	VND	0.0915966	0.198795	0.0806164	0.628992
				4	133	136	166	VND	0.0915966	0.198795	0.0806164	0.628992
				5	168	171	201	TAD	0.173989	0.150753	0.380104	0.295154
				6	203	206	232	VSN	0.670991	0.0949689	0.0638619	0.170178
				7	234	237	267	VSS	0.497458	0.122344	0.0908208	0.289377
				8	269	272	302	SAD	0.173989	0.150753	0.380104	0.295154
				9	304	307	333	ITN	0.717509	0.0790148	0.0785136	0.124963
				10	335	338	368	QND	0.221065	0.139619	0.0562716	0.583045
				11	370	373	403	ISN	0.756056	0.057436	0.0606996	0.125809
				12	405	408	434	CND	0.124525	0.143975	0.0680684	0.663432
				13	436	439	469	VND	0.0915966	0.198795	0.0806164	0.628992
				14	471	474	504	FGD	0.0863612	0.103718	0.547016	0.262904
				15	506	509	535	FST	0.497458	0.122344	0.0908208	0.289377
				16	537	540	570	VND	0.0915966	0.198795	0.0806164	0.628992
				17	572	575	605	FAD	0.172722	0.286603	0.414866	0.125809
				18	607	610	636	FSD	0.216377	0.0793849	0.537585	0.166653
				19	638	641	671	VNN	0.159753	0.422525	0.0863316	0.33139
				20	673	676	707	AVQ	0.309481	0.0630691	0.0666528	0.560797
				21	709	712	739	EAD	0.0981559	0.0630691	0.594965	0.24381
				22	741	744	773	VRD	0.309481	0.168732	0.0666528	0.455135
				23	775	778	807	SIK	0.131282	0.221931	0.175628	0.471159
				24	809	812	877	PSL	0.497458	0.122344	0.0908208	0.289377
TEA020957.1	CsPPR107	798	E2	1	7	10	40	TVD	0.415143	0.0630691	0.277978	0.24381
				2	42	45	71	FNN	0.13336	0.211041	0.366277	0.289322
				3	73	76	102	YHN	0.25	0.25	0.25	0.25
				4	104	107	137	VNT	0.0644279	0.661858	0.0437498	0.229965
				5	139	142	172	FAN	0.497597	0.0847437	0.128858	0.288801
				6	174	177	203	YNN	0.255267	0.138714	0.467016	0.139003
				7	205	208	238	VTD	0.145694	0.0406957	0.659505	0.154106
				8	240	243	287	ISD	0.110222	0.224103	0.394033	0.271642
				9	289	292	318	HNS	0.115224	0.602357	0.0494072	0.233011
				10	320	323	353	VND	0.0915966	0.198795	0.0806164	0.628992
				11	355	358	384	VIR	0.131282	0.221931	0.175628	0.471159
				12	386	389	419	SND	0.0700463	0.0450075	0.0475649	0.837381
				13	421	424	454	TAD	0.173989	0.150753	0.380104	0.295154
				14	456	459	485	YSD	0.186516	0.0532461	0.53996	0.220279
				15	487	490	520	VNT	0.0644279	0.661858	0.0437498	0.229965
				16	522	525	555	FAN	0.497597	0.0847437	0.128858	0.288801
				17	557	560	586	FTN	0.591919	0.0472627	0.0499482	0.31087
				18	588	591	621	VND	0.0915966	0.198795	0.0806164	0.628992
				19	623	626	657	IVL	0.346058	0.150072	0.0915474	0.412322
				20	659	662	689	DTD	0.14601	0.064726	0.646665	0.142599
				21	691	694	723	IEN	0.25	0.25	0.25	0.25
				22	725	728	757	AVK	0.346058	0.150072	0.0915474	0.412322
TEA005080.1	CsPPR111	576	E2	1	2	5	35	VKE	0.089389	0.390769	0.144033	0.375809
				2	70	73	103	FSS	0.497458	0.122344	0.0908208	0.289377
				3	105	108	138	FSV	0.497458	0.122344	0.0908208	0.289377
				4	140	143	169	YTN	0.483708	0.0847437	0.170525	0.261023
				5	171	174	200	VND	0.0915966	0.198795	0.0806164	0.628992
				6	202	205	231	VNN	0.159753	0.422525	0.0863316	0.33139
				7	233	236	262	ANN	0.0828682	0.329639	0.0562716	0.531221
				8	264	267	293	VID	0.089389	0.140769	0.144033	0.625809
				9	295	298	328	LNQ	0.116929	0.281465	0.0956023	0.506004
				10	367	370	396	HTD	0.309481	0.0630691	0.489303	0.138148
				11	398	401	431	VTN	0.71082	0.11739	0.0778614	0.0939285
				12	433	436	466	VTS	0.382294	0.0532461	0.12537	0.43909
				13	468	471	498	DGH	0.281454	0.0899767	0.299264	0.329305
				14	500	503	532	GGT	0.309481	0.0630691	0.0666528	0.560797
				15	534	537	566	GSK	0.497458	0.122344	0.0908208	0.289377
TEA009633.1	CsPPR113	848	E2	1	45	48	78	NFG	0.25	0.25	0.25	0.25
				2	80	83	115	EGN	0.669493	0.0499517	0.0527901	0.227765
				3	117	120	146	YTN	0.483708	0.0847437	0.170525	0.261023
				4	148	151	181	FAD	0.172722	0.286603	0.414866	0.125809
				5	183	186	216	FPC	0.0761242	0.0872032	0.169197	0.667476
				6	218	221	247	FSN	0.58017	0.0864832	0.0654684	0.267878
				7	249	252	282	VNT	0.0644279	0.661858	0.0437498	0.229965
				8	284	287	317	VAD	0.0777411	0.168302	0.467016	0.286941
				9	319	322	348	ISD	0.110222	0.224103	0.394033	0.271642
				10	350	353	383	VND	0.0915966	0.198795	0.0806164	0.628992
				11	385	388	418	VAD	0.0777411	0.168302	0.467016	0.286941
				12	420	423	449	VGD	0.0863612	0.103718	0.547016	0.262904
				13	451	454	484	VNN	0.159753	0.422525	0.0863316	0.33139
				14	486	489	519	INN	0.149435	0.418265	0.0771099	0.355189
				15	521	524	554	ITN	0.717509	0.0790148	0.0785136	0.124963
				16	556	559	589	VVS	0.413067	0.168302	0.0527901	0.365841
				17	591	594	620	PTE	0.322722	0.0907693	0.227366	0.359142
				18	622	625	655	PND	0.0777411	0.227477	0.0922402	0.602542
				19	657	660	691	VTS	0.382294	0.0532461	0.12537	0.43909
				20	693	696	723	KGD	0.0863612	0.103718	0.547016	0.262904
				21	725	728	757	QGN	0.503633	0.0844616	0.0426698	0.369235
				22	759	762	791	GVK	0.346058	0.150072	0.0915474	0.412322
TEA006974.1	CsPPR114	572	E2	1	24	27	57	FTD	0.089389	0.112992	0.449588	0.348031
				2	59	62	92	YPN	0.0981559	0.0630691	0.207536	0.631239
				3	94	97	123	QND	0.221065	0.139619	0.0562716	0.583045
				4	125	128	158	LND	0.089389	0.057436	0.227366	0.625809
				5	160	163	189	VNN	0.159753	0.422525	0.0863316	0.33139
				6	191	194	225	ITD	0.0644279	0.117372	0.499598	0.318602
				7	227	230	262	DSY	0.410663	0.113786	0.217831	0.25772
				8	264	267	293	SPD	0.0582269	0.0875971	0.200128	0.654048
				9	295	298	328	VND	0.0915966	0.198795	0.0806164	0.628992
				10	361	364	390	PND	0.0777411	0.227477	0.0922402	0.602542
				11	392	395	425	VNN	0.159753	0.422525	0.0863316	0.33139
				12	427	430	461	VTG	0.626468	0.0630691	0.172315	0.138148
				13	463	466	493	EAD	0.0981559	0.0630691	0.594965	0.24381
				14	495	498	527	CGY	0.281454	0.0899767	0.299264	0.329305
				15	529	532	561	GVK	0.346058	0.150072	0.0915474	0.412322
TEA001667.1	CsPPR115	822	DYW	1	49	52	78	CNN	0.13155	0.359876	0.172228	0.336346
				2	80	83	109	VNT	0.0644279	0.661858	0.0437498	0.229965
				3	111	114	144	VTD	0.145694	0.0406957	0.659505	0.154106
				4	146	149	179	VAT	0.289349	0.129794	0.261303	0.319555
				5	181	184	210	IND	0.114257	0.114207	0.0767909	0.694746
				6	212	215	245	VNT	0.0644279	0.661858	0.0437498	0.229965
				7	247	250	280	FAN	0.497597	0.0847437	0.128858	0.288801
				8	282	285	311	FND	0.256814	0.154636	0.0785667	0.509983
				9	313	316	347	VNR	0.116929	0.281465	0.0956023	0.506004
				10	349	352	382	LSE	0.410663	0.113786	0.217831	0.25772
				11	384	387	413	LNN	0.0981559	0.0630691	0.38364	0.455135
				12	415	418	448	VTD	0.145694	0.0406957	0.659505	0.154106
				13	450	453	483	AAN	0.497597	0.0847437	0.128858	0.288801
				14	485	488	514	FSN	0.58017	0.0864832	0.0654684	0.267878
				15	516	519	549	VND	0.0915966	0.198795	0.0806164	0.628992
				16	551	554	585	VLK	0.089389	0.057436	0.0606996	0.792475
				17	587	590	617	EAD	0.0981559	0.0630691	0.594965	0.24381
				18	619	622	652	ISD	0.110222	0.224103	0.394033	0.271642
				19	654	657	686	GVK	0.346058	0.150072	0.0915474	0.412322
				20	688	691	822	PSW	0.410663	0.113786	0.217831	0.25772
TEA014568.1	CsPPR118	812	DYW	1	30	33	63	YQR	0.25	0.25	0.25	0.25
				2	65	68	94	HND	0.229065	0.202772	0.205457	0.362706
				3	96	99	127	VTD	0.145694	0.0406957	0.659505	0.154106
				4	129	132	158	VND	0.0915966	0.198795	0.0806164	0.628992
				5	209	212	238	YCD	0.196091	0.109127	0.309216	0.385566
				6	281	284	304	VND	0.0915966	0.198795	0.0806164	0.628992
				7	306	309	342	FTS	0.399478	0.187965	0.119833	0.292723
				8	344	347	373	SND	0.0700463	0.0450075	0.0475649	0.837381
				9	375	378	404	VNN	0.159753	0.422525	0.0863316	0.33139
				10	406	409	439	LTC	0.449355	0.0697129	0.331829	0.149103
				11	441	444	474	YAS	0.41454	0.0532461	0.0562716	0.475942
				12	476	479	505	SND	0.0700463	0.0450075	0.0475649	0.837381
				13	507	510	540	VND	0.0915966	0.198795	0.0806164	0.628992
				14	542	545	576	ILG	0.221949	0.221995	0.0411741	0.514882
				15	578	581	608	DAG	0.290163	0.191443	0.263567	0.254828
				16	610	613	642	PEH	0.25	0.25	0.25	0.25
				17	644	647	676	GIK	0.131282	0.221931	0.175628	0.471159
				18	678	681	812	PSW	0.410663	0.113786	0.217831	0.25772
TEA007605.1	CsPPR121	741	DYW	1	65	68	98	ISD	0.110222	0.224103	0.394033	0.271642
				2	100	103	129	KND	0.124525	0.143975	0.0680684	0.663432
				3	131	134	164	ISN	0.756056	0.057436	0.0606996	0.125809
				4	166	169	199	FPD	0.0828682	0.0993116	0.194468	0.623352
				5	201	204	230	FNN	0.13336	0.211041	0.366277	0.289322
				6	232	235	265	VND	0.0915966	0.198795	0.0806164	0.628992
				7	267	270	300	YSD	0.186516	0.0532461	0.53996	0.220279
				8	302	305	331	FND	0.256814	0.154636	0.0785667	0.509983
				9	333	336	366	VNN	0.159753	0.422525	0.0863316	0.33139
				10	368	371	401	FSD	0.216377	0.0793849	0.537585	0.166653
				11	403	406	432	FVD	0.0981559	0.168732	0.172315	0.560797
				12	434	437	467	INN	0.149435	0.418265	0.0771099	0.355189
				13	469	472	502	TLD	0.203818	0.0630691	0.0666528	0.66646
				14	504	507	533	YND	0.0621242	0.214539	0.0945721	0.628764
				15	535	538	568	ATD	0.089389	0.224103	0.5607	0.125809
				16	570	573	603	FSD	0.216377	0.0793849	0.537585	0.166653
				17	605	608	634	FNG	0.290163	0.179926	0.12537	0.404541
				18	636	639	669	VSN	0.670991	0.0949689	0.0638619	0.170178
				19	707	710	737	EAN	0.497597	0.0847437	0.128858	0.288801
				20	739	742	771	SGK	0.281454	0.0899767	0.299264	0.329305
				21	773	776	805	GVK	0.346058	0.150072	0.0915474	0.412322
				22	807	810	741	PSW	0.410663	0.113786	0.217831	0.25772
TEA026471.1	CsPPR125	759	DYW	1	2	5	33	SFN	0.25	0.25	0.25	0.25
				2	35	38	64	WQN	0.25	0.25	0.25	0.25
				3	66	69	99	LKD	0.089389	0.390769	0.144033	0.375809
				4	131	134	160	YNT	0.0871255	0.630232	0.0912528	0.19139
				5	162	165	191	VNN	0.159753	0.422525	0.0863316	0.33139
				6	193	196	222	ITS	0.399478	0.187965	0.119833	0.292723
				7	224	227	257	VNN	0.159753	0.422525	0.0863316	0.33139
				8	259	262	292	TVN	0.426343	0.161456	0.108135	0.304067
				9	294	297	324	FTN	0.591919	0.0472627	0.0499482	0.31087
				10	326	329	355	VNN	0.159753	0.422525	0.0863316	0.33139
				11	357	360	391	VND	0.0915966	0.198795	0.0806164	0.628992
				12	393	396	426	VVS	0.413067	0.168302	0.0527901	0.365841
				13	428	431	457	SND	0.0700463	0.0450075	0.0475649	0.837381
				14	459	462	492	VND	0.0915966	0.198795	0.0806164	0.628992
				15	494	497	523	VIE	0.131282	0.221931	0.175628	0.471159
				16	525	528	555	DAH	0.289349	0.129794	0.261303	0.319555
				17	557	560	589	GGN	0.503633	0.0844616	0.0426698	0.369235
				18	591	594	623	GVK	0.346058	0.150072	0.0915474	0.412322
				19	625	628	759	ISW	0.410663	0.113786	0.217831	0.25772
TEA013120.1	CsPPR126	703	E2	1	62	65	95	LVN	0.426343	0.161456	0.108135	0.304067
				2	97	100	126	FND	0.256814	0.154636	0.0785667	0.509983
				3	128	131	157	VNG	0.290163	0.179926	0.12537	0.404541
				4	159	162	192	VTN	0.71082	0.11739	0.0778614	0.0939285
				5	229	232	258	LTN	0.711927	0.0719179	0.0946278	0.121527
				6	260	263	289	VND	0.0915966	0.198795	0.0806164	0.628992
				7	291	294	324	VGN	0.520806	0.0630691	0.0666528	0.349472
				8	326	329	359	VVY	0.346058	0.150072	0.0915474	0.412322
				9	361	364	390	FAH	0.289349	0.129794	0.261303	0.319555
				10	392	395	421	PND	0.0777411	0.227477	0.0922402	0.602542
				11	423	426	456	VSN	0.670991	0.0949689	0.0638619	0.170178
				12	458	461	491	IVN	0.394011	0.274394	0.0666528	0.264943
				13	493	496	524	NAS	0.41454	0.0532461	0.0562716	0.475942
				14	526	529	559	SNN	0.128934	0.42177	0.102337	0.346959
				15	561	564	595	ITT	0.488246	0.150935	0.153621	0.207198
				16	597	600	627	KGD	0.0863612	0.103718	0.547016	0.262904
				17	629	632	661	VGH	0.281454	0.0899767	0.299264	0.329305
				18	663	666	695	GVR	0.0981559	0.0630691	0.0666528	0.772122
TEA002480.1	CsPPR137	694	E2	1	4	7	37	QLN	0.589389	0.057436	0.0606996	0.292475
				2	39	42	69	VKD	0.089389	0.390769	0.144033	0.375809
				3	71	74	105	SND	0.0700463	0.0450075	0.0475649	0.837381
				4	107	110	140	YPD	0.0828682	0.0532461	0.0562716	0.807614
				5	142	145	171	VSD	0.373617	0.168302	0.348666	0.109415
				6	173	176	206	AND	0.0828682	0.0532461	0.0562716	0.807614
				7	208	211	241	VTD	0.145694	0.0406957	0.659505	0.154106
				8	243	246	272	YSS	0.410663	0.113786	0.217831	0.25772
				9	274	277	307	VNT	0.0644279	0.661858	0.0437498	0.229965
				10	309	312	342	TSD	0.167192	0.111174	0.479736	0.241898
				11	344	347	373	FSN	0.58017	0.0864832	0.0654684	0.267878
				12	375	378	408	VND	0.0915966	0.198795	0.0806164	0.628992
				13	410	413	443	ITN	0.717509	0.0790148	0.0785136	0.124963
				14	445	448	474	IGD	0.0863612	0.103718	0.547016	0.262904
				15	476	479	509	VTD	0.145694	0.0406957	0.659505	0.154106
				16	547	550	578	ESD	0.167192	0.111174	0.479736	0.241898
				17	580	583	612	GSD	0.167192	0.111174	0.479736	0.241898
				18	614	617	646	SIK	0.131282	0.221931	0.175628	0.471159
TEA001858.1	CsPPR138	796	DYW	1	21	24	54	HAD	0.173989	0.150753	0.380104	0.295154
				2	56	59	85	FNN	0.13336	0.211041	0.366277	0.289322
				3	87	90	120	VVN	0.426343	0.161456	0.108135	0.304067
				4	122	125	155	FTN	0.591919	0.0472627	0.0499482	0.31087
				5	157	160	186	FTD	0.089389	0.112992	0.449588	0.348031
				6	188	191	221	VTN	0.71082	0.11739	0.0778614	0.0939285
				7	223	226	256	FVD	0.0981559	0.168732	0.172315	0.560797
				8	258	261	287	YAD	0.173989	0.150753	0.380104	0.295154
				9	289	292	322	ISN	0.756056	0.057436	0.0606996	0.125809
				10	324	327	357	FAN	0.497597	0.0847437	0.128858	0.288801
				11	359	362	388	FNN	0.13336	0.211041	0.366277	0.289322
				12	390	393	423	VNT	0.0644279	0.661858	0.0437498	0.229965
				13	425	428	458	VSD	0.373617	0.168302	0.348666	0.109415
				14	460	463	489	AND	0.0828682	0.0532461	0.0562716	0.807614
				15	491	494	524	VNN	0.159753	0.422525	0.0863316	0.33139
				16	526	529	560	LVC	0.346058	0.150072	0.0915474	0.412322
				17	562	565	592	ETS	0.399478	0.187965	0.119833	0.292723
				18	594	597	626	MRD	0.309481	0.168732	0.0666528	0.455135
				19	628	631	660	AVK	0.346058	0.150072	0.0915474	0.412322
				20	662	665	796	PSW	0.410663	0.113786	0.217831	0.25772
TEA016729.1	CsPPR141	549	E2	1	65	68	98	GPD	0.0582269	0.0875971	0.200128	0.654048
				2	100	103	129	MTN	0.711927	0.0719179	0.0946278	0.121527
				3	131	134	160	VNS	0.114511	0.709302	0.0421855	0.134001
				4	162	165	193	IIN	0.172722	0.265769	0.0606996	0.500809
				5	195	198	224	VTN	0.71082	0.11739	0.0778614	0.0939285
				6	226	229	255	FSN	0.58017	0.0864832	0.0654684	0.267878
				7	257	260	290	VND	0.0915966	0.198795	0.0806164	0.628992
				8	292	295	325	IVN	0.394011	0.274394	0.0666528	0.264943
				9	327	330	356	FNN	0.13336	0.211041	0.366277	0.289322
				10	358	361	391	ANN	0.0828682	0.329639	0.0562716	0.531221
				11	428	431	458	QGN	0.503633	0.0844616	0.0426698	0.369235
				12	460	463	495	TGN	0.503633	0.0844616	0.0426698	0.369235
				13	497	500	529	SVK	0.346058	0.150072	0.0915474	0.412322
TEA022566.1	CsPPR143	705	E+	1	20	23	53	SAE	0.150987	0.0630691	0.38364	0.402304
				2	55	58	84	FNN	0.13336	0.211041	0.366277	0.289322
				3	86	89	115	FND	0.256814	0.154636	0.0785667	0.509983
				4	117	120	150	CNN	0.13155	0.359876	0.172228	0.336346
				5	152	155	185	YGD	0.150987	0.327225	0.38364	0.138148
				6	187	190	216	FSN	0.58017	0.0864832	0.0654684	0.267878
				7	218	221	251	VND	0.0915966	0.198795	0.0806164	0.628992
				8	253	256	287	VAD	0.0777411	0.168302	0.467016	0.286941
				9	289	292	318	VNN	0.159753	0.422525	0.0863316	0.33139
				10	320	323	349	VTN	0.71082	0.11739	0.0778614	0.0939285
				11	351	354	384	VNT	0.0644279	0.661858	0.0437498	0.229965
				12	386	389	425	YGD	0.150987	0.327225	0.38364	0.138148
				13	427	430	456	FND	0.256814	0.154636	0.0785667	0.509983
				14	458	461	491	VND	0.0915966	0.198795	0.0806164	0.628992
				15	493	496	527	VIQ	0.309481	0.380056	0.0930684	0.217394
				16	529	532	559	DTD	0.14601	0.064726	0.646665	0.142599
				17	561	564	593	VAN	0.497597	0.0847437	0.128858	0.288801
				18	595	598	627	GVK	0.346058	0.150072	0.0915474	0.412322
				19	629	632	705	PSA	0.410663	0.113786	0.217831	0.25772
TEA008809.1	CsPPR145	757	E2	1	2	5	27	YCD	0.196091	0.109127	0.309216	0.385566
				2	29	32	62	TND	0.254983	0.0472627	0.0499482	0.647806
				3	64	67	97	YSD	0.186516	0.0532461	0.53996	0.220279
				4	99	102	129	FTN	0.591919	0.0472627	0.0499482	0.31087
				5	131	134	164	ANV	0.116929	0.281465	0.0956023	0.506004
				6	166	169	199	SSD	0.089389	0.140769	0.394033	0.375809
				7	201	204	230	YTE	0.322722	0.0907693	0.227366	0.359142
				8	232	235	265	END	0.124525	0.143975	0.0680684	0.663432
				9	267	270	300	FSN	0.58017	0.0864832	0.0654684	0.267878
				10	302	305	331	ASD	0.167192	0.111174	0.479736	0.241898
				11	333	336	366	VGD	0.0863612	0.103718	0.547016	0.262904
				12	368	371	401	DAD	0.173989	0.150753	0.380104	0.295154
				13	403	406	432	FSN	0.58017	0.0864832	0.0654684	0.267878
				14	434	437	467	LND	0.089389	0.057436	0.227366	0.625809
				15	469	472	502	VTD	0.145694	0.0406957	0.659505	0.154106
				16	504	507	533	QNN	0.13155	0.359876	0.172228	0.336346
				17	535	538	568	VND	0.0915966	0.198795	0.0806164	0.628992
				18	570	573	604	VLR	0.221949	0.221995	0.0411741	0.514882
				19	606	609	636	EVN	0.426343	0.161456	0.108135	0.304067
				20	638	641	670	KLR	0.221949	0.221995	0.0411741	0.514882
				21	672	675	704	SVK	0.346058	0.150072	0.0915474	0.412322
TEA008010.1	CsPPR146	938	E2	1	45	48	81	HNR	0.116929	0.281465	0.0956023	0.506004
				2	83	86	116	CLH	0.221949	0.221995	0.0411741	0.514882
				3	118	121	147	ATD	0.089389	0.224103	0.5607	0.125809
				4	149	152	182	IND	0.114257	0.114207	0.0767909	0.694746
				5	184	187	217	GVD	0.271123	0.173636	0.130355	0.424886
				6	219	222	248	FND	0.256814	0.154636	0.0785667	0.509983
				7	250	253	283	VND	0.0915966	0.198795	0.0806164	0.628992
				8	285	288	320	VSH	0.410663	0.113786	0.217831	0.25772
				9	322	325	351	SND	0.0700463	0.0450075	0.0475649	0.837381
				10	353	356	387	IND	0.114257	0.114207	0.0767909	0.694746
				11	389	392	422	VVD	0.221065	0.191443	0.194468	0.393024
				12	424	427	453	LND	0.089389	0.057436	0.227366	0.625809
				13	455	458	488	VNS	0.114511	0.709302	0.0421855	0.134001
				14	490	493	523	SLN	0.589389	0.057436	0.0606996	0.292475
				15	525	528	555	LND	0.089389	0.057436	0.227366	0.625809
				16	557	560	590	AND	0.0828682	0.0532461	0.0562716	0.807614
				17	592	595	625	IVD	0.309481	0.485719	0.0666528	0.138148
				18	627	630	656	RNN	0.13155	0.359876	0.172228	0.336346
				19	690	693	723	ISN	0.756056	0.057436	0.0606996	0.125809
				20	725	728	754	FAS	0.41454	0.0532461	0.0562716	0.475942
				21	756	759	789	ANT	0.0871255	0.630232	0.0912528	0.19139
				22	791	794	825	SII	0.131282	0.221931	0.175628	0.471159
				23	827	830	857	EIE	0.131282	0.221931	0.175628	0.471159
				24	859	862	892	GGV	0.281454	0.0899767	0.299264	0.329305
				25	894	897	926	GVK	0.346058	0.150072	0.0915474	0.412322
TEA024551.1	CsPPR147	781	DYW	1	10	13	43	DAS	0.41454	0.0532461	0.0562716	0.475942
				2	45	48	74	FNN	0.13336	0.211041	0.366277	0.289322
				3	76	79	105	SND	0.0700463	0.0450075	0.0475649	0.837381
				4	107	110	140	VTT	0.203818	0.274394	0.172315	0.349472
				5	142	145	175	FTY	0.449355	0.0697129	0.331829	0.149103
				6	177	180	206	SNS	0.115224	0.602357	0.0494072	0.233011
				7	208	211	237	SND	0.0700463	0.0450075	0.0475649	0.837381
				8	239	242	273	VND	0.0915966	0.198795	0.0806164	0.628992
				9	275	278	308	FAS	0.41454	0.0532461	0.0562716	0.475942
				10	310	313	341	PNN	0.13155	0.359876	0.172228	0.336346
				11	343	346	372	ITD	0.0644279	0.117372	0.499598	0.318602
				12	374	377	407	VTN	0.71082	0.11739	0.0778614	0.0939285
				13	409	412	442	YAS	0.41454	0.0532461	0.0562716	0.475942
				14	444	447	474	SND	0.0700463	0.0450075	0.0475649	0.837381
				15	476	479	509	VTD	0.145694	0.0406957	0.659505	0.154106
				16	511	514	545	IVT	0.432792	0.0499517	0.0527901	0.464466
				17	547	550	577	SAD	0.173989	0.150753	0.380104	0.295154
				18	579	582	611	IGN	0.503633	0.0844616	0.0426698	0.369235
				19	613	616	645	GSK	0.410663	0.113786	0.217831	0.25772
				20	647	650	781	QSW	0.410663	0.113786	0.217831	0.25772
TEA013903.1	CsPPR148	975	E2	1	93	96	126	FND	0.256814	0.154636	0.0785667	0.509983
				2	128	131	161	FPN	0.256056	0.057436	0.171811	0.514698
				3	163	166	192	VTD	0.145694	0.0406957	0.659505	0.154106
				4	194	197	227	VNN	0.159753	0.422525	0.0863316	0.33139
				5	229	232	262	SAD	0.173989	0.150753	0.380104	0.295154
				6	264	267	293	YAN	0.497597	0.0847437	0.128858	0.288801
				7	295	298	328	TNN	0.0981559	0.274394	0.207536	0.419914
				8	330	333	363	ILQ	0.221949	0.221995	0.0411741	0.514882
				9	365	368	394	PTN	0.711927	0.0719179	0.0946278	0.121527
				10	396	399	429	LND	0.089389	0.057436	0.227366	0.625809
				11	431	434	464	VVN	0.426343	0.161456	0.108135	0.304067
				12	466	469	495	NNN	0.13155	0.359876	0.172228	0.336346
				13	497	500	530	IND	0.114257	0.114207	0.0767909	0.694746
				14	532	535	565	VVV	0.346058	0.150072	0.0915474	0.412322
				15	567	570	596	SNS	0.115224	0.602357	0.0494072	0.233011
				16	598	601	631	VNN	0.159753	0.422525	0.0863316	0.33139
				17	665	668	694	STN	0.520806	0.0630691	0.277978	0.138148
				18	696	699	729	SND	0.0700463	0.0450075	0.0475649	0.837381
				19	766	769	795	AND	0.0828682	0.0532461	0.0562716	0.807614
				20	797	800	930	VSD	0.373617	0.168302	0.348666	0.109415
				21	932	935	865	IVR	0.0981559	0.0630691	0.0666528	0.772122
				22	867	870	897	EAS	0.41454	0.0532461	0.0562716	0.475942
				23	899	902	931	SEN	0.25	0.25	0.25	0.25
				24	933	936	965	GVK	0.346058	0.150072	0.0915474	0.412322
TEA028996.1	CsPPR149	860	E+	1	37	40	66	YND	0.0621242	0.214539	0.0945721	0.628764
				2	68	71	97	FNC	0.116929	0.281465	0.0956023	0.506004
				3	99	102	132	ISS	0.410663	0.113786	0.217831	0.25772
				4	134	137	167	FGN	0.503633	0.0844616	0.0426698	0.369235
				5	169	172	199	FTS	0.399478	0.187965	0.119833	0.292723
				6	201	204	234	VTN	0.71082	0.11739	0.0778614	0.0939285
				7	236	239	269	YPN	0.0981559	0.0630691	0.207536	0.631239
				8	271	274	300	FSN	0.58017	0.0864832	0.0654684	0.267878
				9	302	305	335	VND	0.0915966	0.198795	0.0806164	0.628992
				10	337	340	370	FPY	0.0761242	0.0872032	0.169197	0.667476
				11	372	375	401	LND	0.089389	0.057436	0.227366	0.625809
				12	403	406	436	ITD	0.0644279	0.117372	0.499598	0.318602
				13	438	441	471	IAT	0.289349	0.129794	0.261303	0.319555
				14	473	476	502	SND	0.0700463	0.0450075	0.0475649	0.837381
				15	504	507	537	ITD	0.0644279	0.117372	0.499598	0.318602
				16	539	542	573	IIG	0.131282	0.221931	0.175628	0.471159
				17	575	578	605	DAD	0.173989	0.150753	0.380104	0.295154
				18	607	610	639	TKN	0.089389	0.390769	0.144033	0.375809
				19	641	644	673	VVK	0.346058	0.150072	0.0915474	0.412322
				20	675	678	860	PSA	0.410663	0.113786	0.217831	0.25772
TEA005763.1	CsPPR150	628	E2	1	12	15	45	NLN	0.589389	0.057436	0.0606996	0.292475
				2	88	91	121	FND	0.256814	0.154636	0.0785667	0.509983
				3	123	126	156	FSD	0.216377	0.0793849	0.537585	0.166653
				4	158	161	187	FND	0.256814	0.154636	0.0785667	0.509983
				5	189	192	220	VNN	0.159753	0.422525	0.0863316	0.33139
				6	222	225	252	IND	0.114257	0.114207	0.0767909	0.694746
				7	254	257	283	IND	0.114257	0.114207	0.0767909	0.694746
				8	285	288	314	VAD	0.0777411	0.168302	0.467016	0.286941
				9	316	319	350	IND	0.114257	0.114207	0.0767909	0.694746
				10	352	355	385	TSG	0.410663	0.113786	0.217831	0.25772
				11	387	390	416	KVS	0.413067	0.168302	0.0527901	0.365841
				12	418	421	451	DND	0.0981559	0.0630691	0.0666528	0.772122
				13	453	456	487	IIK	0.131282	0.221931	0.175628	0.471159
				14	489	492	519	QGN	0.503633	0.0844616	0.0426698	0.369235
				15	521	524	553	VRN	0.309481	0.168732	0.0666528	0.455135
				16	555	558	587	SVK	0.346058	0.150072	0.0915474	0.412322
TEA025209.1	CsPPR151	851	E2	1	55	58	88	HAD	0.173989	0.150753	0.380104	0.295154
				2	90	93	119	FNN	0.13336	0.211041	0.366277	0.289322
				3	121	124	155	ISN	0.756056	0.057436	0.0606996	0.125809
				4	157	160	190	FAD	0.172722	0.286603	0.414866	0.125809
				5	192	195	221	YTS	0.732131	0.0630691	0.0666528	0.138148
				6	223	226	256	VTD	0.145694	0.0406957	0.659505	0.154106
				7	258	261	291	YCD	0.196091	0.109127	0.309216	0.385566
				8	293	296	322	SNN	0.128934	0.42177	0.102337	0.346959
				9	324	327	357	ITD	0.0644279	0.117372	0.499598	0.318602
				10	359	362	392	FTD	0.089389	0.112992	0.449588	0.348031
				11	394	397	423	FNN	0.13336	0.211041	0.366277	0.289322
				12	425	428	458	INS	0.168598	0.415277	0.0666528	0.349472
				13	460	463	493	LVD	0.271123	0.173636	0.130355	0.424886
				14	495	498	524	FSD	0.216377	0.0793849	0.537585	0.166653
				15	526	529	559	VNN	0.159753	0.422525	0.0863316	0.33139
				16	561	564	594	FVD	0.0981559	0.168732	0.172315	0.560797
				17	596	599	625	FND	0.256814	0.154636	0.0785667	0.509983
				18	627	630	660	VNN	0.159753	0.422525	0.0863316	0.33139
				19	697	700	727	EAA	0.289349	0.129794	0.261303	0.319555
				20	729	732	761	IRD	0.309481	0.168732	0.0666528	0.455135
				21	763	766	795	GVK	0.346058	0.150072	0.0915474	0.412322
TEA028085.1	CsPPR152	587	E2	1	103	106	137	FND	0.256814	0.154636	0.0785667	0.509983
				2	139	142	172	FPD	0.0828682	0.0993116	0.194468	0.623352
				3	174	177	203	YSD	0.186516	0.0532461	0.53996	0.220279
				4	205	208	234	VND	0.0915966	0.198795	0.0806164	0.628992
				5	236	239	265	VTN	0.71082	0.11739	0.0778614	0.0939285
				6	267	270	296	VNN	0.159753	0.422525	0.0863316	0.33139
				7	298	301	331	INT	0.0871255	0.630232	0.0912528	0.19139
				8	333	336	366	AVD	0.271123	0.173636	0.130355	0.424886
				9	368	371	397	VTK	0.449355	0.0697129	0.331829	0.149103
				10	399	402	432	GTH	0.449355	0.0697129	0.331829	0.149103
				11	434	437	468	IIT	0.0981559	0.380056	0.277978	0.24381
				12	470	473	500	KGN	0.503633	0.0844616	0.0426698	0.369235
				13	502	505	534	VMA	0.118448	0.208039	0.220201	0.453312
				14	536	539	568	GVK	0.346058	0.150072	0.0915474	0.412322
TEA018150.1	CsPPR155	695	DYW	1	59	62	88	FND	0.256814	0.154636	0.0785667	0.509983
				2	90	93	119	FND	0.256814	0.154636	0.0785667	0.509983
				3	121	124	154	VNN	0.159753	0.422525	0.0863316	0.33139
				4	156	159	189	YVN	0.426343	0.161456	0.108135	0.304067
				5	191	194	220	YNN	0.255267	0.138714	0.467016	0.139003
				6	222	225	251	VNG	0.290163	0.179926	0.12537	0.404541
				7	288	291	321	ITD	0.0644279	0.117372	0.499598	0.318602
				8	323	326	356	FSD	0.216377	0.0793849	0.537585	0.166653
				9	358	361	387	LSN	0.701306	0.0675978	0.0428504	0.188245
				10	389	392	422	IND	0.114257	0.114207	0.0767909	0.694746
				11	424	427	458	VVT	0.432792	0.0499517	0.0527901	0.464466
				12	460	463	490	DAN	0.497597	0.0847437	0.128858	0.288801
				13	492	495	524	LSN	0.701306	0.0675978	0.0428504	0.188245
				14	526	529	558	GIK	0.131282	0.221931	0.175628	0.471159
				15	560	563	695	ASW	0.410663	0.113786	0.217831	0.25772
TEA017378.1	CsPPR158	787	S2	1	53	56	88	QLP	0.221949	0.221995	0.0411741	0.514882
				2	90	93	119	FNN	0.13336	0.211041	0.366277	0.289322
				3	121	124	154	VNT	0.0644279	0.661858	0.0437498	0.229965
				4	190	193	219	FTN	0.591919	0.0472627	0.0499482	0.31087
				5	221	224	254	VNS	0.114511	0.709302	0.0421855	0.134001
				6	256	259	289	YVK	0.346058	0.150072	0.0915474	0.412322
				7	291	294	320	LND	0.089389	0.057436	0.227366	0.625809
				8	322	325	355	VNN	0.159753	0.422525	0.0863316	0.33139
				9	357	360	390	TVD	0.415143	0.0630691	0.277978	0.24381
				10	392	395	421	FSN	0.58017	0.0864832	0.0654684	0.267878
				11	423	426	451	VND	0.0915966	0.198795	0.0806164	0.628992
				12	453	456	486	REN	0.25	0.25	0.25	0.25
				13	551	554	584	VND	0.0915966	0.198795	0.0806164	0.628992
				14	586	589	622	YVD	0.271123	0.173636	0.130355	0.424886
				15	624	627	653	FNN	0.13336	0.211041	0.366277	0.289322
				16	655	658	688	ITD	0.0644279	0.117372	0.499598	0.318602
				17	690	693	724	VVD	0.221065	0.191443	0.194468	0.393024
				18	726	729	756	DVN	0.426343	0.161456	0.108135	0.304067
TEA028093.1	CsPPR160	705	DYW	1	103	106	137	FND	0.256814	0.154636	0.0785667	0.509983
				2	139	142	172	FPD	0.0828682	0.0993116	0.194468	0.623352
				3	174	177	203	YSD	0.186516	0.0532461	0.53996	0.220279
				4	205	208	234	VND	0.0915966	0.198795	0.0806164	0.628992
				5	236	239	265	VTN	0.71082	0.11739	0.0778614	0.0939285
				6	267	270	296	VNN	0.159753	0.422525	0.0863316	0.33139
				7	298	301	331	INT	0.0871255	0.630232	0.0912528	0.19139
				8	333	336	366	AVD	0.271123	0.173636	0.130355	0.424886
				9	368	371	397	VTK	0.449355	0.0697129	0.331829	0.149103
				10	399	402	432	GTH	0.449355	0.0697129	0.331829	0.149103
				11	434	437	468	IIT	0.0981559	0.380056	0.277978	0.24381
				12	470	473	500	KGN	0.503633	0.0844616	0.0426698	0.369235
				13	502	505	534	VMA	0.118448	0.208039	0.220201	0.453312
				14	536	539	568	GVK	0.346058	0.150072	0.0915474	0.412322
				15	570	573	705	PSW	0.410663	0.113786	0.217831	0.25772
TEA020885.1	CsPPR161	536	E2	1	2	5	29	ILN	0.589389	0.057436	0.0606996	0.292475
				2	31	34	64	LIY	0.131282	0.221931	0.175628	0.471159
				3	66	69	95	FND	0.256814	0.154636	0.0785667	0.509983
				4	97	100	130	VND	0.0915966	0.198795	0.0806164	0.628992
				5	132	135	165	VVD	0.221065	0.191443	0.194468	0.393024
				6	167	170	196	YNN	0.255267	0.138714	0.467016	0.139003
				7	198	201	227	VND	0.0915966	0.198795	0.0806164	0.628992
				8	229	232	262	ITD	0.0644279	0.117372	0.499598	0.318602
				9	264	267	297	IAD	0.173989	0.150753	0.380104	0.295154
				10	299	302	328	YND	0.0621242	0.214539	0.0945721	0.628764
				11	330	333	363	VTT	0.203818	0.274394	0.172315	0.349472
				12	365	368	399	GVE	0.337875	0.0847437	0.149691	0.42769
				13	401	404	431	KGD	0.0863612	0.103718	0.547016	0.262904
				14	433	436	465	VRN	0.309481	0.168732	0.0666528	0.455135
				15	467	470	499	GVK	0.346058	0.150072	0.0915474	0.412322
TEA031229.1	CsPPR162	684	E1	1	29	32	62	TSH	0.410663	0.113786	0.217831	0.25772
				2	64	67	101	YND	0.0621242	0.214539	0.0945721	0.628764
				3	103	106	169	YPD	0.0828682	0.0532461	0.0562716	0.807614
				4	171	174	200	FNN	0.13336	0.211041	0.366277	0.289322
				5	202	205	235	VTN	0.71082	0.11739	0.0778614	0.0939285
				6	237	240	270	IVN	0.394011	0.274394	0.0666528	0.264943
				7	272	275	301	LNN	0.0981559	0.0630691	0.38364	0.455135
				8	303	306	336	VND	0.0915966	0.198795	0.0806164	0.628992
				9	338	341	371	VLW	0.221949	0.221995	0.0411741	0.514882
				10	373	376	402	SNT	0.0871255	0.630232	0.0912528	0.19139
				11	404	407	433	VND	0.0915966	0.198795	0.0806164	0.628992
				12	435	438	468	VND	0.0915966	0.198795	0.0806164	0.628992
				13	470	473	503	VVD	0.221065	0.191443	0.194468	0.393024
				14	505	508	534	KTD	0.0981559	0.0630691	0.700627	0.138148
				15	536	539	569	STD	0.196091	0.168302	0.467016	0.16859
				16	571	574	605	VVQ	0.309481	0.0630691	0.0666528	0.560797
				17	607	610	637	VGN	0.520806	0.0630691	0.0666528	0.349472
				18	639	642	671	VGT	0.309481	0.0630691	0.0666528	0.560797
TEA010878.1	CsPPR164	943	E+	1	45	48	74	VNI	0.116929	0.281465	0.0956023	0.506004
				2	76	79	109	SND	0.0700463	0.0450075	0.0475649	0.837381
				3	111	114	144	SSD	0.089389	0.140769	0.394033	0.375809
				4	146	149	175	STN	0.520806	0.0630691	0.277978	0.138148
				5	177	180	210	VTN	0.71082	0.11739	0.0778614	0.0939285
				6	212	215	245	LAA	0.289349	0.129794	0.261303	0.319555
				7	247	250	276	FND	0.256814	0.154636	0.0785667	0.509983
				8	278	281	311	VNT	0.0644279	0.661858	0.0437498	0.229965
				9	313	316	346	MAD	0.173989	0.150753	0.380104	0.295154
				10	348	351	378	NTN	0.711927	0.0719179	0.0946278	0.121527
				11	380	383	413	VTN	0.71082	0.11739	0.0778614	0.0939285
				12	415	418	444	FSS	0.410663	0.113786	0.217831	0.25772
				13	446	449	475	STD	0.196091	0.168302	0.467016	0.16859
				14	477	480	510	VSN	0.670991	0.0949689	0.0638619	0.170178
				15	512	515	546	FSA	0.410663	0.113786	0.217831	0.25772
				16	548	551	577	CSD	0.167192	0.111174	0.479736	0.241898
				17	579	582	612	VND	0.0915966	0.198795	0.0806164	0.628992
				18	614	617	648	IIT	0.0981559	0.380056	0.277978	0.24381
				19	650	653	680	ESG	0.410663	0.113786	0.217831	0.25772
				20	682	685	714	TRD	0.309481	0.168732	0.0666528	0.455135
				21	716	719	748	AVK	0.346058	0.150072	0.0915474	0.412322
				22	750	753	943	ASF	0.410663	0.113786	0.217831	0.25772
TEA017894.1	CsPPR166	893	E2	1	92	95	111	FNN	0.13336	0.211041	0.366277	0.289322
				2	113	116	146	VNN	0.159753	0.422525	0.0863316	0.33139
				3	148	151	181	FGN	0.503633	0.0844616	0.0426698	0.369235
				4	183	186	212	YAN	0.497597	0.0847437	0.128858	0.288801
				5	214	217	247	VNN	0.159753	0.422525	0.0863316	0.33139
				6	249	252	282	FSD	0.216377	0.0793849	0.537585	0.166653
				7	284	287	313	FTS	0.399478	0.187965	0.119833	0.292723
				8	315	318	348	VTN	0.71082	0.11739	0.0778614	0.0939285
				9	350	353	383	YTD	0.393342	0.0499517	0.407841	0.148865
				10	385	388	415	AAH	0.289349	0.129794	0.261303	0.319555
				11	417	420	450	NAN	0.497597	0.0847437	0.128858	0.288801
				12	484	487	513	SSD	0.089389	0.140769	0.394033	0.375809
				13	515	518	548	VAD	0.0777411	0.168302	0.467016	0.286941
				14	550	553	583	TTQ	0.449355	0.0697129	0.331829	0.149103
				15	585	588	614	LGD	0.0863612	0.103718	0.547016	0.262904
				16	616	619	649	VSD	0.373617	0.168302	0.348666	0.109415
				17	651	654	684	FSE	0.626468	0.168732	0.0666528	0.138148
				18	686	689	715	SSD	0.089389	0.140769	0.394033	0.375809
				19	717	720	750	ITD	0.0644279	0.117372	0.499598	0.318602
				20	752	755	786	VTD	0.145694	0.0406957	0.659505	0.154106
				21	788	791	786	VIG	0.131282	0.221931	0.175628	0.471159
				22	788	791	818	RAD	0.173989	0.150753	0.380104	0.295154
				23	820	823	852	LGD	0.0863612	0.103718	0.547016	0.262904
				24	854	857	886	GVK	0.346058	0.150072	0.0915474	0.412322
TEA025449.1	CsPPR167	877	DYW	1	70	73	101	TNE	0.0981559	0.327225	0.225146	0.349472
				2	103	106	136	ACD	0.196091	0.109127	0.309216	0.385566
				3	138	141	167	VSK	0.410663	0.113786	0.217831	0.25772
				4	169	172	202	FNN	0.13336	0.211041	0.366277	0.289322
				5	204	207	237	YSY	0.410663	0.113786	0.217831	0.25772
				6	239	242	268	TND	0.254983	0.0472627	0.0499482	0.647806
				7	270	273	303	IND	0.114257	0.114207	0.0767909	0.694746
				8	305	308	338	AVE	0.337875	0.0847437	0.149691	0.42769
				9	340	343	369	TNT	0.0871255	0.630232	0.0912528	0.19139
				10	371	374	404	VTD	0.145694	0.0406957	0.659505	0.154106
				11	406	409	439	FTN	0.591919	0.0472627	0.0499482	0.31087
				12	441	444	470	SND	0.0700463	0.0450075	0.0475649	0.837381
				13	472	475	504	VND	0.0915966	0.198795	0.0806164	0.628992
				14	506	509	539	VTD	0.145694	0.0406957	0.659505	0.154106
				15	541	544	570	YND	0.0621242	0.214539	0.0945721	0.628764
				16	572	575	605	VTD	0.145694	0.0406957	0.659505	0.154106
				17	607	610	641	VIK	0.131282	0.221931	0.175628	0.471159
				18	643	646	673	EAD	0.0981559	0.0630691	0.594965	0.24381
				19	675	678	707	TGN	0.503633	0.0844616	0.0426698	0.369235
				20	709	712	741	GVK	0.346058	0.150072	0.0915474	0.412322
				21	743	746	877	PSW	0.410663	0.113786	0.217831	0.25772
TEA024641.1	CsPPR168	1082	DYW	1	89	92	122	GED	0.25	0.25	0.25	0.25
				2	124	127	153	FNN	0.13336	0.211041	0.366277	0.289322
				3	155	158	190	VAY	0.289349	0.129794	0.261303	0.319555
				4	192	195	225	IAD	0.173989	0.150753	0.380104	0.295154
				5	227	230	257	VNN	0.159753	0.422525	0.0863316	0.33139
				6	259	262	296	VNS	0.114511	0.709302	0.0421855	0.134001
				7	298	301	333	YGD	0.150987	0.327225	0.38364	0.138148
				8	335	338	364	YSN	0.679299	0.1159	0.0666528	0.138148
				9	366	369	398	VNN	0.159753	0.422525	0.0863316	0.33139
				10	400	403	438	DVK	0.346058	0.150072	0.0915474	0.412322
				11	440	443	469	AND	0.0828682	0.0532461	0.0562716	0.807614
				12	471	474	504	VNS	0.114511	0.709302	0.0421855	0.134001
				13	506	509	539	FID	0.193179	0.0911823	0.170698	0.544941
				14	541	544	570	SND	0.0700463	0.0450075	0.0475649	0.837381
				15	572	575	606	VNN	0.159753	0.422525	0.0863316	0.33139
				16	608	611	641	VID	0.089389	0.140769	0.144033	0.625809
				17	643	646	673	AND	0.0828682	0.0532461	0.0562716	0.807614
				18	675	678	708	VND	0.0915966	0.198795	0.0806164	0.628992
				19	710	713	743	FAD	0.172722	0.286603	0.414866	0.125809
				20	745	748	774	VSN	0.670991	0.0949689	0.0638619	0.170178
				21	776	779	809	YND	0.0621242	0.214539	0.0945721	0.628764
				22	811	814	845	VVR	0.0981559	0.0630691	0.0666528	0.772122
				23	847	850	877	ESN	0.701306	0.0675978	0.0428504	0.188245
				24	879	882	913	LRN	0.309481	0.168732	0.0666528	0.455135
				25	915	918	947	VVK	0.346058	0.150072	0.0915474	0.412322
				26	949	952	1082	DYW	0.25	0.25	0.25	0.25
TEA020138.1	CsPPR169	743	DYW	1	6	9	39	NCE	0.403855	0.0618527	0.165418	0.368875
				2	41	44	70	FNN	0.13336	0.211041	0.366277	0.289322
				3	72	75	101	FND	0.256814	0.154636	0.0785667	0.509983
				4	103	106	137	VNT	0.0644279	0.661858	0.0437498	0.229965
				5	139	142	172	ISY	0.410663	0.113786	0.217831	0.25772
				6	174	177	203	FSN	0.58017	0.0864832	0.0654684	0.267878
				7	205	208	234	VND	0.0915966	0.198795	0.0806164	0.628992
				8	236	239	269	ITD	0.0644279	0.117372	0.499598	0.318602
				9	271	274	304	FGN	0.503633	0.0844616	0.0426698	0.369235
				10	306	309	335	FSN	0.58017	0.0864832	0.0654684	0.267878
				11	337	340	370	VTD	0.145694	0.0406957	0.659505	0.154106
				12	372	375	405	FGF	0.281454	0.0899767	0.299264	0.329305
				13	407	410	436	TND	0.254983	0.0472627	0.0499482	0.647806
				14	438	441	471	ITD	0.0644279	0.117372	0.499598	0.318602
				15	473	476	507	VII	0.131282	0.221931	0.175628	0.471159
				16	509	512	539	DTD	0.14601	0.064726	0.646665	0.142599
				17	541	544	573	IAN	0.497597	0.0847437	0.128858	0.288801
				18	575	578	607	AVK	0.346058	0.150072	0.0915474	0.412322
				19	609	612	743	PSW	0.410663	0.113786	0.217831	0.25772
TEA005780.1	CsPPR171	681	E2	1	56	59	89	INH	0.116929	0.281465	0.0956023	0.506004
				2	124	127	157	YND	0.0621242	0.214539	0.0945721	0.628764
				3	159	162	192	RVD	0.271123	0.173636	0.130355	0.424886
				4	194	197	223	VND	0.0915966	0.198795	0.0806164	0.628992
				5	225	228	258	VTN	0.71082	0.11739	0.0778614	0.0939285
				6	260	263	293	VIT	0.0981559	0.380056	0.277978	0.24381
				7	295	298	324	TND	0.254983	0.0472627	0.0499482	0.647806
				8	326	329	355	FTN	0.591919	0.0472627	0.0499482	0.31087
				9	357	360	390	VNI	0.116929	0.281465	0.0956023	0.506004
				10	428	431	457	IND	0.114257	0.114207	0.0767909	0.694746
				11	459	462	492	VND	0.0915966	0.198795	0.0806164	0.628992
				12	494	497	528	IVK	0.346058	0.150072	0.0915474	0.412322
				13	530	533	560	EAD	0.0981559	0.0630691	0.594965	0.24381
				14	562	565	594	AGD	0.0863612	0.103718	0.547016	0.262904
				15	596	599	628	GIK	0.131282	0.221931	0.175628	0.471159
TEA008424.1	CsPPR172	735	E2	1	2	5	18	GED	0.25	0.25	0.25	0.25
				2	20	23	54	FGT	0.309481	0.0630691	0.0666528	0.560797
				3	56	59	89	FPD	0.0828682	0.0993116	0.194468	0.623352
				4	91	94	120	VTD	0.145694	0.0406957	0.659505	0.154106
				5	122	125	155	VSD	0.373617	0.168302	0.348666	0.109415
				6	157	160	190	VLN	0.520806	0.0630691	0.0666528	0.349472
				7	192	195	221	SNS	0.115224	0.602357	0.0494072	0.233011
				8	223	226	256	STN	0.520806	0.0630691	0.277978	0.138148
				9	258	261	292	VMY	0.118448	0.208039	0.220201	0.453312
				10	294	297	323	LSH	0.410663	0.113786	0.217831	0.25772
				11	325	328	358	VND	0.0915966	0.198795	0.0806164	0.628992
				12	360	363	392	FAN	0.497597	0.0847437	0.128858	0.288801
				13	394	397	423	FNS	0.115224	0.602357	0.0494072	0.233011
				14	425	428	458	VND	0.0915966	0.198795	0.0806164	0.628992
				15	460	463	493	VLD	0.0981559	0.380056	0.0666528	0.455135
				16	495	498	524	YTS	0.732131	0.0630691	0.0666528	0.138148
				17	526	529	559	VSN	0.670991	0.0949689	0.0638619	0.170178
				18	561	564	595	VMM	0.118448	0.208039	0.220201	0.453312
				19	597	600	627	ESD	0.167192	0.111174	0.479736	0.241898
				20	629	632	661	SGD	0.0863612	0.103718	0.547016	0.262904
				21	663	666	695	GTK	0.449355	0.0697129	0.331829	0.149103
TEA000701.1	CsPPR173	697	E2	1	7	10	40	VTN	0.71082	0.11739	0.0778614	0.0939285
				2	42	45	75	ASQ	0.410663	0.113786	0.217831	0.25772
				3	77	80	106	FSD	0.216377	0.0793849	0.537585	0.166653
				4	108	111	145	VNN	0.159753	0.422525	0.0863316	0.33139
				5	147	150	180	FAD	0.172722	0.286603	0.414866	0.125809
				6	182	185	211	FGD	0.0863612	0.103718	0.547016	0.262904
				7	213	216	246	VNN	0.159753	0.422525	0.0863316	0.33139
				8	248	251	281	TSD	0.167192	0.111174	0.479736	0.241898
				9	283	286	312	YTN	0.483708	0.0847437	0.170525	0.261023
				10	314	317	347	VND	0.0915966	0.198795	0.0806164	0.628992
				11	349	352	382	FID	0.193179	0.0911823	0.170698	0.544941
				12	384	387	413	SNN	0.128934	0.42177	0.102337	0.346959
				13	415	418	448	IAD	0.173989	0.150753	0.380104	0.295154
				14	450	453	483	FST	0.410663	0.113786	0.217831	0.25772
				15	485	488	514	YSN	0.679299	0.1159	0.0666528	0.138148
				16	516	519	549	VNT	0.0644279	0.661858	0.0437498	0.229965
				17	551	554	585	LVS	0.413067	0.168302	0.0527901	0.365841
				18	587	590	617	EAE	0.150987	0.0630691	0.38364	0.402304
				19	619	622	651	GGH	0.281454	0.0899767	0.299264	0.329305
				20	653	656	685	STK	0.449355	0.0697129	0.331829	0.149103
TEA026658.1	CsPPR174	575	E2	1	14	17	47	HSS	0.410663	0.113786	0.217831	0.25772
				2	49	52	78	FNN	0.13336	0.211041	0.366277	0.289322
				3	80	83	109	HNN	0.13155	0.359876	0.172228	0.336346
				4	111	114	146	VND	0.0915966	0.198795	0.0806164	0.628992
				5	148	151	181	FVN	0.520491	0.122344	0.102337	0.254828
				6	183	186	212	AND	0.0828682	0.0532461	0.0562716	0.807614
				7	214	217	243	VTN	0.71082	0.11739	0.0778614	0.0939285
				8	245	248	279	VSN	0.670991	0.0949689	0.0638619	0.170178
				9	281	284	318	FVN	0.520491	0.122344	0.102337	0.254828
				10	320	323	349	FND	0.256814	0.154636	0.0785667	0.509983
				11	351	354	384	VNN	0.159753	0.422525	0.0863316	0.33139
				12	386	389	420	VLR	0.221949	0.221995	0.0411741	0.514882
				13	422	425	455	NTR	0.449355	0.0697129	0.331829	0.149103
				14	457	460	489	GGN	0.503633	0.0844616	0.0426698	0.369235
				15	491	494	523	GVK	0.346058	0.150072	0.0915474	0.412322
TEA000744.1	CsPPR175	893	E2	1	82	85	111	FNN	0.13336	0.211041	0.366277	0.289322
				2	113	116	146	VNN	0.159753	0.422525	0.0863316	0.33139
				3	148	151	181	FGN	0.503633	0.0844616	0.0426698	0.369235
				4	183	186	212	YAN	0.497597	0.0847437	0.128858	0.288801
				5	214	217	247	VNN	0.159753	0.422525	0.0863316	0.33139
				6	249	252	282	FSD	0.216377	0.0793849	0.537585	0.166653
				7	284	287	313	FTS	0.399478	0.187965	0.119833	0.292723
				8	315	318	348	VTN	0.71082	0.11739	0.0778614	0.0939285
				9	350	353	383	YTD	0.393342	0.0499517	0.407841	0.148865
				10	385	388	415	AAH	0.289349	0.129794	0.261303	0.319555
				11	417	420	450	NAN	0.497597	0.0847437	0.128858	0.288801
				12	484	487	513	SSD	0.089389	0.140769	0.394033	0.375809
				13	515	518	548	VAD	0.0777411	0.168302	0.467016	0.286941
				14	550	553	583	TTQ	0.449355	0.0697129	0.331829	0.149103
				15	585	588	614	LGD	0.0863612	0.103718	0.547016	0.262904
				16	616	619	649	VSD	0.373617	0.168302	0.348666	0.109415
				17	651	654	684	FSE	0.626468	0.168732	0.0666528	0.138148
				18	686	689	715	SSD	0.089389	0.140769	0.394033	0.375809
				19	717	720	750	ITD	0.0644279	0.117372	0.499598	0.318602
				20	752	755	786	VIG	0.131282	0.221931	0.175628	0.471159
				21	788	791	818	RAD	0.173989	0.150753	0.380104	0.295154
				22	820	823	852	LGD	0.0863612	0.103718	0.547016	0.262904
				23	854	857	886	GVK	0.346058	0.150072	0.0915474	0.412322
TEA006311.1	CsPPR176	687	DYW	1	82	85	115	ASG	0.410663	0.113786	0.217831	0.25772
				2	117	120	146	FND	0.256814	0.154636	0.0785667	0.509983
				3	148	151	177	CND	0.124525	0.143975	0.0680684	0.663432
				4	179	182	213	FTN	0.591919	0.0472627	0.0499482	0.31087
				5	215	218	248	FSD	0.216377	0.0793849	0.537585	0.166653
				6	250	253	279	VSD	0.373617	0.168302	0.348666	0.109415
				7	281	284	314	VTN	0.71082	0.11739	0.0778614	0.0939285
				8	316	319	349	FAI	0.289349	0.129794	0.261303	0.319555
				9	351	354	380	FSD	0.216377	0.0793849	0.537585	0.166653
				10	382	385	415	VTD	0.145694	0.0406957	0.659505	0.154106
				11	417	420	451	VVT	0.432792	0.0499517	0.0527901	0.464466
				12	453	456	483	DAD	0.173989	0.150753	0.380104	0.295154
				13	485	488	517	FAN	0.497597	0.0847437	0.128858	0.288801
				14	519	522	551	VVK	0.346058	0.150072	0.0915474	0.412322
				15	553	556	687	PSW	0.410663	0.113786	0.217831	0.25772
TEA017009.1	CsPPR177	913	DYW	1	103	106	135	IFD	0.25	0.25	0.25	0.25
				2	137	140	166	HNN	0.13155	0.359876	0.172228	0.336346
				3	168	171	201	VSN	0.670991	0.0949689	0.0638619	0.170178
				4	203	206	236	FVC	0.346058	0.150072	0.0915474	0.412322
				5	238	241	267	FND	0.256814	0.154636	0.0785667	0.509983
				6	269	272	303	AND	0.0828682	0.0532461	0.0562716	0.807614
				7	305	308	338	FSN	0.58017	0.0864832	0.0654684	0.267878
				8	340	343	369	SND	0.0700463	0.0450075	0.0475649	0.837381
				9	371	374	400	ITN	0.717509	0.0790148	0.0785136	0.124963
				10	402	405	435	VNT	0.0644279	0.661858	0.0437498	0.229965
				11	437	440	470	FTN	0.591919	0.0472627	0.0499482	0.31087
				12	472	475	503	CAS	0.41454	0.0532461	0.0562716	0.475942
				13	505	508	538	ITD	0.0644279	0.117372	0.499598	0.318602
				14	540	543	573	VAD	0.0777411	0.168302	0.467016	0.286941
				15	575	578	604	GND	0.089389	0.057436	0.0606996	0.792475
				16	606	609	639	VND	0.0915966	0.198795	0.0806164	0.628992
				17	641	644	677	VLA	0.221949	0.221995	0.0411741	0.514882
				18	679	682	709	EAE	0.150987	0.0630691	0.38364	0.402304
				19	711	714	743	SRN	0.309481	0.168732	0.0666528	0.455135
				20	745	748	777	SVK	0.346058	0.150072	0.0915474	0.412322
				21	779	782	913	PSW	0.410663	0.113786	0.217831	0.25772
TEA011339.1	CsPPR179	811	DYW	1	72	75	101	LTI	0.449355	0.0697129	0.331829	0.149103
				2	103	106	136	AHV	0.25	0.25	0.25	0.25
				3	138	141	171	YTN	0.483708	0.0847437	0.170525	0.261023
				4	173	176	202	FAD	0.172722	0.286603	0.414866	0.125809
				5	204	207	237	VND	0.0915966	0.198795	0.0806164	0.628992
				6	239	242	272	VVL	0.346058	0.150072	0.0915474	0.412322
				7	274	277	303	NTT	0.488246	0.150935	0.153621	0.207198
				8	305	308	338	VNT	0.0644279	0.661858	0.0437498	0.229965
				9	340	343	373	VMD	0.089389	0.224103	0.394033	0.292475
				10	375	378	404	SNT	0.0871255	0.630232	0.0912528	0.19139
				11	406	409	439	VND	0.0915966	0.198795	0.0806164	0.628992
				12	441	444	474	FVN	0.520491	0.122344	0.102337	0.254828
				13	476	479	505	FTH	0.449355	0.0697129	0.331829	0.149103
				14	507	510	540	TNN	0.0981559	0.274394	0.207536	0.419914
				15	542	545	576	ILS	0.228278	0.362992	0.144033	0.264698
				16	578	581	608	DGA	0.281454	0.0899767	0.299264	0.329305
				17	610	613	642	NGE	0.281454	0.0899767	0.299264	0.329305
				18	644	647	676	GVK	0.346058	0.150072	0.0915474	0.412322
				19	678	681	811	PSW	0.410663	0.113786	0.217831	0.25772
TEA004430.1	CsPPR180	1006	E1	1	191	194	224	RED	0.25	0.25	0.25	0.25
				2	226	229	255	FPN	0.256056	0.057436	0.171811	0.514698
				3	257	260	290	HND	0.229065	0.202772	0.205457	0.362706
				4	292	295	325	FPD	0.0828682	0.0993116	0.194468	0.623352
				5	327	330	358	FND	0.256814	0.154636	0.0785667	0.509983
				6	360	363	389	VND	0.0915966	0.198795	0.0806164	0.628992
				7	391	394	420	VNN	0.159753	0.422525	0.0863316	0.33139
				8	422	425	451	VSN	0.670991	0.0949689	0.0638619	0.170178
				9	453	456	486	VTD	0.145694	0.0406957	0.659505	0.154106
				10	488	491	521	GIS	0.0981559	0.0630691	0.277978	0.560797
				11	523	526	552	HND	0.229065	0.202772	0.205457	0.362706
				12	554	557	587	VND	0.0915966	0.198795	0.0806164	0.628992
				13	625	628	655	EGN	0.669493	0.0499517	0.0527901	0.227765
				14	657	660	689	IGM	0.281454	0.0899767	0.299264	0.329305
TEA008724.1	CsPPR181	666	E2	1	34	37	67	LQN	0.25	0.25	0.25	0.25
				2	102	105	135	FND	0.256814	0.154636	0.0785667	0.509983
				3	137	140	170	FPD	0.0828682	0.0993116	0.194468	0.623352
				4	172	175	201	YND	0.0621242	0.214539	0.0945721	0.628764
				5	203	206	237	VNN	0.159753	0.422525	0.0863316	0.33139
				6	239	242	271	AVT	0.432792	0.0499517	0.0527901	0.464466
				7	273	276	302	INN	0.149435	0.418265	0.0771099	0.355189
				8	304	307	333	ITD	0.0644279	0.117372	0.499598	0.318602
				9	335	338	368	VTD	0.145694	0.0406957	0.659505	0.154106
				10	370	373	403	FVD	0.0981559	0.168732	0.172315	0.560797
				11	405	408	434	VTD	0.145694	0.0406957	0.659505	0.154106
				12	436	439	469	ATD	0.089389	0.224103	0.5607	0.125809
				13	471	474	505	IIK	0.131282	0.221931	0.175628	0.471159
				14	507	510	540	EGV	0.281454	0.0899767	0.299264	0.329305
				15	542	545	574	PSD	0.167192	0.111174	0.479736	0.241898
				16	576	579	608	GTK	0.449355	0.0697129	0.331829	0.149103
TEA032939.1	CsPPR188	655	E+	1	54	57	87	ENN	0.131056	0.390769	0.0606996	0.417475
				2	89	92	122	FPD	0.0828682	0.0993116	0.194468	0.623352
				3	124	127	153	YSD	0.186516	0.0532461	0.53996	0.220279
				4	155	158	184	VND	0.0915966	0.198795	0.0806164	0.628992
				5	186	189	215	INN	0.149435	0.418265	0.0771099	0.355189
				6	217	220	246	VND	0.0915966	0.198795	0.0806164	0.628992
				7	248	251	281	VNT	0.0644279	0.661858	0.0437498	0.229965
				8	283	286	316	AVN	0.426343	0.161456	0.108135	0.304067
				9	318	321	347	ITD	0.0644279	0.117372	0.499598	0.318602
				10	349	352	382	LNN	0.0981559	0.0630691	0.38364	0.455135
				11	384	387	418	IVR	0.0981559	0.0630691	0.0666528	0.772122
				12	420	423	450	EGN	0.669493	0.0499517	0.0527901	0.227765
				13	452	455	484	SGH	0.281454	0.0899767	0.299264	0.329305
				14	486	489	518	GIK	0.131282	0.221931	0.175628	0.471159
				15	520	523	655	PSS	0.410663	0.113786	0.217831	0.25772
TEA032767.1	CsPPR189	665	E2	1	33	36	66	AGD	0.0863612	0.103718	0.547016	0.262904
				2	68	71	97	FSN	0.58017	0.0864832	0.0654684	0.267878
				3	137	140	171	FTD	0.089389	0.112992	0.449588	0.348031
				4	173	176	202	FND	0.256814	0.154636	0.0785667	0.509983
				5	204	207	238	INN	0.149435	0.418265	0.0771099	0.355189
				6	240	243	273	VVD	0.221065	0.191443	0.194468	0.393024
				7	275	278	304	SND	0.0700463	0.0450075	0.0475649	0.837381
				8	306	309	335	IGG	0.281454	0.0899767	0.299264	0.329305
				9	337	340	370	SNN	0.128934	0.42177	0.102337	0.346959
				10	372	375	405	VSN	0.670991	0.0949689	0.0638619	0.170178
				11	407	410	436	YTS	0.732131	0.0630691	0.0666528	0.138148
				12	438	441	471	ITD	0.0644279	0.117372	0.499598	0.318602
				13	473	476	507	VTA	0.449355	0.0697129	0.331829	0.149103
				14	509	512	539	EAS	0.41454	0.0532461	0.0562716	0.475942
				15	541	544	573	KGN	0.503633	0.0844616	0.0426698	0.369235
				16	575	578	607	GIK	0.131282	0.221931	0.175628	0.471159
TEA032748.1	CsPPR190	665	E2	1	33	36	66	AGD	0.0863612	0.103718	0.547016	0.262904
				2	68	71	97	FSN	0.58017	0.0864832	0.0654684	0.267878
				3	137	140	171	FTD	0.089389	0.112992	0.449588	0.348031
				4	173	176	202	FND	0.256814	0.154636	0.0785667	0.509983
				5	204	207	238	INN	0.149435	0.418265	0.0771099	0.355189
				6	240	243	273	VVD	0.221065	0.191443	0.194468	0.393024
				7	275	278	304	SND	0.0700463	0.0450075	0.0475649	0.837381
				8	306	309	335	IGG	0.281454	0.0899767	0.299264	0.329305
				9	337	340	370	SNN	0.128934	0.42177	0.102337	0.346959
				10	372	375	405	VSN	0.670991	0.0949689	0.0638619	0.170178
				11	407	410	436	YTS	0.732131	0.0630691	0.0666528	0.138148
				12	438	441	471	ITD	0.0644279	0.117372	0.499598	0.318602
				13	473	476	507	VTS	0.382294	0.0532461	0.12537	0.43909
				14	509	512	539	EAS	0.41454	0.0532461	0.0562716	0.475942
				15	541	544	573	KGN	0.503633	0.0844616	0.0426698	0.369235
				16	575	578	607	GIK	0.131282	0.221931	0.175628	0.471159
TEA022153.1	CsPPR191	616	E2	1	54	57	87	FNN	0.13336	0.211041	0.366277	0.289322
				2	89	92	122	FPQ	0.0761242	0.0872032	0.169197	0.667476
				3	124	127	153	CNT	0.0871255	0.630232	0.0912528	0.19139
				4	155	158	188	VND	0.0915966	0.198795	0.0806164	0.628992
				5	190	193	223	FVD	0.0981559	0.168732	0.172315	0.560797
				6	225	228	254	YNN	0.255267	0.138714	0.467016	0.139003
				7	256	259	285	VTN	0.71082	0.11739	0.0778614	0.0939285
				8	287	290	320	VND	0.0915966	0.198795	0.0806164	0.628992
				9	322	325	355	TTS	0.399478	0.187965	0.119833	0.292723
				10	357	360	386	SNN	0.128934	0.42177	0.102337	0.346959
				11	388	391	421	VND	0.0915966	0.198795	0.0806164	0.628992
				12	423	426	457	ITE	0.322722	0.0907693	0.227366	0.359142
				13	459	462	489	EAD	0.0981559	0.0630691	0.594965	0.24381
				14	491	494	523	VGS	0.281454	0.0899767	0.299264	0.329305
				15	525	528	557	GVK	0.346058	0.150072	0.0915474	0.412322
TEA014200.1	CsPPR192	638	E2	1	61	64	95	LPP	0.0761242	0.0872032	0.169197	0.667476
				2	97	100	126	ARD	0.309481	0.168732	0.0666528	0.455135
				3	128	131	162	FNN	0.13336	0.211041	0.366277	0.289322
				4	164	167	197	YPD	0.0828682	0.0532461	0.0562716	0.807614
				5	199	202	228	FND	0.256814	0.154636	0.0785667	0.509983
				6	230	233	259	VND	0.0915966	0.198795	0.0806164	0.628992
				7	261	264	290	FND	0.256814	0.154636	0.0785667	0.509983
				8	292	295	321	VNN	0.159753	0.422525	0.0863316	0.33139
				9	323	326	357	VNN	0.159753	0.422525	0.0863316	0.33139
				10	359	362	393	AVD	0.271123	0.173636	0.130355	0.424886
				11	395	398	424	LTN	0.711927	0.0719179	0.0946278	0.121527
				12	426	429	459	VNN	0.159753	0.422525	0.0863316	0.33139
				13	461	464	495	AIK	0.131282	0.221931	0.175628	0.471159
				14	497	500	527	EGG	0.281454	0.0899767	0.299264	0.329305
				15	529	532	561	AGD	0.0863612	0.103718	0.547016	0.262904
				16	563	566	595	GVK	0.346058	0.150072	0.0915474	0.412322
TEA031875.1	CsPPR193	931	DYW	1	83	86	113	TQY	0.25	0.25	0.25	0.25
				2	115	118	148	HVD	0.271123	0.173636	0.130355	0.424886
				3	150	153	183	RTD	0.177229	0.099099	0.568311	0.155361
				4	216	219	249	LNN	0.0981559	0.0630691	0.38364	0.455135
				5	251	254	284	FAN	0.497597	0.0847437	0.128858	0.288801
				6	286	289	315	FNN	0.13336	0.211041	0.366277	0.289322
				7	317	320	350	SND	0.0700463	0.0450075	0.0475649	0.837381
				8	352	355	385	VNN	0.159753	0.422525	0.0863316	0.33139
				9	387	390	420	STD	0.196091	0.168302	0.467016	0.16859
				10	422	425	451	YTN	0.483708	0.0847437	0.170525	0.261023
				11	453	456	486	FND	0.256814	0.154636	0.0785667	0.509983
				12	488	491	521	VNN	0.159753	0.422525	0.0863316	0.33139
				13	523	526	556	VTN	0.71082	0.11739	0.0778614	0.0939285
				14	558	561	591	ASD	0.167192	0.111174	0.479736	0.241898
				15	593	596	622	FTT	0.488246	0.150935	0.153621	0.207198
				16	624	627	657	AND	0.0828682	0.0532461	0.0562716	0.807614
				17	659	662	693	ITT	0.488246	0.150935	0.153621	0.207198
				18	695	698	725	ESD	0.167192	0.111174	0.479736	0.241898
				19	727	730	759	TGN	0.503633	0.0844616	0.0426698	0.369235
				20	761	764	795	AVI	0.346058	0.150072	0.0915474	0.412322
				21	797	800	931	HSW	0.410663	0.113786	0.217831	0.25772
TEA025791.1	CsPPR194	743	SS	1	87	90	122	DYN	0.25	0.25	0.25	0.25
				2	124	127	153	IKT	0.089389	0.390769	0.144033	0.375809
				3	155	158	188	LAD	0.173989	0.150753	0.380104	0.295154
				4	190	193	223	YPD	0.0828682	0.0532461	0.0562716	0.807614
				5	225	228	254	FND	0.256814	0.154636	0.0785667	0.509983
				6	256	259	289	VTD	0.145694	0.0406957	0.659505	0.154106
				7	291	294	324	INK	0.116929	0.281465	0.0956023	0.506004
				8	326	329	359	TNN	0.0981559	0.274394	0.207536	0.419914
				9	361	364	394	VAN	0.497597	0.0847437	0.128858	0.288801
				10	396	399	425	HGN	0.503633	0.0844616	0.0426698	0.369235
				11	462	465	495	INN	0.149435	0.418265	0.0771099	0.355189
				12	497	500	542	VNN	0.159753	0.422525	0.0863316	0.33139
				13	544	547	577	ITN	0.717509	0.0790148	0.0785136	0.124963
				14	579	582	608	FSN	0.58017	0.0864832	0.0654684	0.267878
				15	610	613	643	VNS	0.114511	0.709302	0.0421855	0.134001
				16	645	648	679	IMN	0.118448	0.208039	0.220201	0.453312
				17	681	684	710	TSD	0.167192	0.111174	0.479736	0.241898
				18	712	715	741	ANN	0.0828682	0.329639	0.0562716	0.531221
TEA001365.1	CsPPR196	872	DYW	1	60	63	93	RNE	0.0981559	0.327225	0.225146	0.349472
				2	130	133	159	RND	0.384574	0.0472627	0.0499482	0.518215
				3	161	164	194	FND	0.256814	0.154636	0.0785667	0.509983
				4	196	199	229	YPD	0.0828682	0.0532461	0.0562716	0.807614
				5	231	234	260	DND	0.0981559	0.0630691	0.0666528	0.772122
				6	262	265	295	IND	0.114257	0.114207	0.0767909	0.694746
				7	297	300	330	MTD	0.14601	0.064726	0.646665	0.142599
				8	332	335	361	TND	0.254983	0.0472627	0.0499482	0.647806
				9	363	366	396	VTD	0.145694	0.0406957	0.659505	0.154106
				10	398	401	431	IVY	0.346058	0.150072	0.0915474	0.412322
				11	433	436	462	INN	0.149435	0.418265	0.0771099	0.355189
				12	464	467	496	ITN	0.717509	0.0790148	0.0785136	0.124963
				13	498	501	531	VVD	0.221065	0.191443	0.194468	0.393024
				14	533	536	561	FND	0.256814	0.154636	0.0785667	0.509983
				15	563	566	596	AND	0.0828682	0.0532461	0.0562716	0.807614
				16	598	601	632	IIN	0.172722	0.265769	0.0606996	0.500809
				17	634	637	664	KAD	0.173989	0.150753	0.380104	0.295154
				18	666	669	698	AGS	0.281454	0.0899767	0.299264	0.329305
				19	700	703	732	GIV	0.131282	0.221931	0.175628	0.471159
				20	734	737	872	PST	0.410663	0.113786	0.217831	0.25772
TEA031323.1	CsPPR197	705	DYW	1	2	5	30	LYD	0.25	0.25	0.25	0.25
				2	32	35	62	YPD	0.0828682	0.0532461	0.0562716	0.807614
				3	64	67	93	FAD	0.172722	0.286603	0.414866	0.125809
				4	95	98	128	GND	0.089389	0.057436	0.0606996	0.792475
				5	130	133	163	VSD	0.373617	0.168302	0.348666	0.109415
				6	165	168	194	FND	0.256814	0.154636	0.0785667	0.509983
				7	196	199	229	VND	0.0915966	0.198795	0.0806164	0.628992
				8	231	234	265	LVD	0.271123	0.173636	0.130355	0.424886
				9	267	270	296	VND	0.0915966	0.198795	0.0806164	0.628992
				10	298	301	332	VNN	0.159753	0.422525	0.0863316	0.33139
				11	334	337	367	GVD	0.271123	0.173636	0.130355	0.424886
				12	369	372	398	YTS	0.732131	0.0630691	0.0666528	0.138148
				13	400	403	433	VND	0.0915966	0.198795	0.0806164	0.628992
				14	435	438	469	VVS	0.413067	0.168302	0.0527901	0.365841
				15	471	474	501	KGD	0.0863612	0.103718	0.547016	0.262904
				16	503	506	535	SGN	0.503633	0.0844616	0.0426698	0.369235
				17	537	540	569	GVK	0.346058	0.150072	0.0915474	0.412322
				18	571	574	705	PSW	0.410663	0.113786	0.217831	0.25772
TEA014447.1	CsPPR198	573	S2	1	17	20	50	TED	0.25	0.25	0.25	0.25
				2	52	55	81	FPN	0.256056	0.057436	0.171811	0.514698
				3	83	86	116	QND	0.221065	0.139619	0.0562716	0.583045
				4	118	121	151	FPD	0.0828682	0.0993116	0.194468	0.623352
				5	153	156	184	FND	0.256814	0.154636	0.0785667	0.509983
				6	186	189	215	VND	0.0915966	0.198795	0.0806164	0.628992
				7	217	220	246	VNN	0.159753	0.422525	0.0863316	0.33139
				8	248	251	277	VSN	0.670991	0.0949689	0.0638619	0.170178
				9	279	282	312	VTD	0.145694	0.0406957	0.659505	0.154106
				10	314	317	347	AIS	0.0981559	0.0630691	0.277978	0.560797
				11	349	352	378	HND	0.229065	0.202772	0.205457	0.362706
				12	380	383	413	VND	0.0915966	0.198795	0.0806164	0.628992
				13	451	454	481	EGN	0.669493	0.0499517	0.0527901	0.227765
TEA010023.1	CsPPR200	758	DYW	1	17	20	46	FTH	0.449355	0.0697129	0.331829	0.149103
				2	48	51	81	FND	0.256814	0.154636	0.0785667	0.509983
				3	83	86	116	CTD	0.14601	0.064726	0.646665	0.142599
				4	118	121	147	FSD	0.216377	0.0793849	0.537585	0.166653
				5	149	152	182	VNT	0.0644279	0.661858	0.0437498	0.229965
				6	184	187	217	VVD	0.221065	0.191443	0.194468	0.393024
				7	219	222	248	LTS	0.399478	0.187965	0.119833	0.292723
				8	250	253	283	VND	0.0915966	0.198795	0.0806164	0.628992
				9	285	288	318	AVN	0.426343	0.161456	0.108135	0.304067
				10	320	323	349	ITN	0.717509	0.0790148	0.0785136	0.124963
				11	351	354	384	ITN	0.717509	0.0790148	0.0785136	0.124963
				12	386	389	419	VVD	0.221065	0.191443	0.194468	0.393024
				13	421	424	451	VTD	0.145694	0.0406957	0.659505	0.154106
				14	453	456	486	INN	0.149435	0.418265	0.0771099	0.355189
				15	488	491	522	AVN	0.426343	0.161456	0.108135	0.304067
				16	524	527	554	KAG	0.290163	0.191443	0.263567	0.254828
				17	556	559	588	AEN	0.25	0.25	0.25	0.25
				18	590	593	622	GVK	0.346058	0.150072	0.0915474	0.412322
				19	624	627	758	PSW	0.410663	0.113786	0.217831	0.25772
TEA018728.1	CsPPR201	742	E2	1	13	16	46	PFT	0.25	0.25	0.25	0.25
				2	48	51	81	PFF	0.25	0.25	0.25	0.25
				3	83	86	112	SND	0.0700463	0.0450075	0.0475649	0.837381
				4	114	117	147	VNN	0.159753	0.422525	0.0863316	0.33139
				5	149	152	182	AVI	0.346058	0.150072	0.0915474	0.412322
				6	184	187	212	SND	0.0700463	0.0450075	0.0475649	0.837381
				7	214	217	248	ISD	0.110222	0.224103	0.394033	0.271642
				8	250	253	283	QVD	0.271123	0.173636	0.130355	0.424886
				9	285	288	314	FNN	0.13336	0.211041	0.366277	0.289322
				10	316	319	349	VND	0.0915966	0.198795	0.0806164	0.628992
				11	351	354	384	VVN	0.426343	0.161456	0.108135	0.304067
				12	386	389	415	LND	0.089389	0.057436	0.227366	0.625809
				13	417	420	450	VSN	0.670991	0.0949689	0.0638619	0.170178
				14	452	455	485	ILD	0.314442	0.405003	0.0527901	0.227765
				15	487	490	516	ATN	0.711927	0.0719179	0.0946278	0.121527
				16	518	521	551	VSN	0.670991	0.0949689	0.0638619	0.170178
				17	553	556	587	VLR	0.221949	0.221995	0.0411741	0.514882
				18	589	592	622	ESG	0.410663	0.113786	0.217831	0.25772
				19	624	627	656	SGN	0.503633	0.0844616	0.0426698	0.369235
				20	658	661	690	ALM	0.221949	0.221995	0.0411741	0.514882
TEA011253.1	CsPPR202	671	E2	1	54	57	81	FND	0.256814	0.154636	0.0785667	0.509983
				2	83	86	123	YPD	0.0828682	0.0532461	0.0562716	0.807614
				3	125	128	154	FND	0.256814	0.154636	0.0785667	0.509983
				4	156	159	189	VND	0.0915966	0.198795	0.0806164	0.628992
				5	191	194	224	VIT	0.0981559	0.380056	0.277978	0.24381
				6	226	229	255	PNT	0.0871255	0.630232	0.0912528	0.19139
				7	257	260	286	VTD	0.145694	0.0406957	0.659505	0.154106
				8	288	291	321	VND	0.0915966	0.198795	0.0806164	0.628992
				9	323	326	356	VVN	0.426343	0.161456	0.108135	0.304067
				10	358	361	387	ATN	0.711927	0.0719179	0.0946278	0.121527
				11	389	392	422	LTD	0.089389	0.057436	0.727366	0.125809
				12	424	427	458	VLK	0.089389	0.057436	0.0606996	0.792475
				13	460	463	490	KSD	0.167192	0.111174	0.479736	0.241898
				14	492	495	524	VGD	0.0863612	0.103718	0.547016	0.262904
				15	526	529	558	GVK	0.346058	0.150072	0.0915474	0.412322
TEA026277.1	CsPPR203	894	DYW	1	60	63	93	AIN	0.172722	0.265769	0.0606996	0.500809
				2	95	98	129	FPS	0.0981559	0.274394	0.0666528	0.560797
				3	131	134	160	TND	0.254983	0.0472627	0.0499482	0.647806
				4	162	165	195	VNS	0.114511	0.709302	0.0421855	0.134001
				5	197	200	232	FVK	0.346058	0.150072	0.0915474	0.412322
				6	234	237	263	FND	0.256814	0.154636	0.0785667	0.509983
				7	265	268	298	VND	0.0915966	0.198795	0.0806164	0.628992
				8	300	303	334	VAN	0.497597	0.0847437	0.128858	0.288801
				9	336	339	365	FSR	0.410663	0.113786	0.217831	0.25772
				10	367	370	401	GNN	0.13155	0.359876	0.172228	0.336346
				11	403	406	436	TAD	0.173989	0.150753	0.380104	0.295154
				12	438	441	467	YND	0.0621242	0.214539	0.0945721	0.628764
				13	469	472	515	VNN	0.159753	0.422525	0.0863316	0.33139
				14	517	520	550	IMD	0.0828682	0.260541	0.12537	0.531221
				15	552	555	581	ASN	0.701306	0.0675978	0.0428504	0.188245
				16	583	586	621	INN	0.149435	0.418265	0.0771099	0.355189
				17	623	626	657	VIT	0.0981559	0.380056	0.277978	0.24381
				18	659	662	690	DAK	0.289349	0.129794	0.261303	0.319555
				19	692	695	724	GSV	0.410663	0.113786	0.217831	0.25772
				20	726	729	758	SVK	0.346058	0.150072	0.0915474	0.412322
				21	760	763	894	PSW	0.410663	0.113786	0.217831	0.25772
TEA004779.1	CsPPR208	733	E2	1	55	58	88	EDS	0.25	0.25	0.25	0.25
				2	90	93	122	FAN	0.497597	0.0847437	0.128858	0.288801
				3	124	127	157	LND	0.089389	0.057436	0.227366	0.625809
				4	159	162	192	FPH	0.0761242	0.0872032	0.169197	0.667476
				5	194	197	223	HNT	0.0871255	0.630232	0.0912528	0.19139
				6	225	228	258	INN	0.149435	0.418265	0.0771099	0.355189
				7	260	263	293	VTT	0.203818	0.274394	0.172315	0.349472
				8	295	298	328	EAY	0.289349	0.129794	0.261303	0.319555
				9	330	333	359	FNN	0.13336	0.211041	0.366277	0.289322
				10	361	364	390	VNN	0.159753	0.422525	0.0863316	0.33139
				11	392	395	425	ISN	0.756056	0.057436	0.0606996	0.125809
				12	427	430	460	ISN	0.756056	0.057436	0.0606996	0.125809
				13	462	465	491	LND	0.089389	0.057436	0.227366	0.625809
				14	493	496	526	VND	0.0915966	0.198795	0.0806164	0.628992
				15	528	531	562	VVQ	0.309481	0.0630691	0.0666528	0.560797
				16	564	567	594	EAN	0.497597	0.0847437	0.128858	0.288801
				17	596	599	628	YGT	0.309481	0.0630691	0.0666528	0.560797
				18	630	633	662	GNK	0.116929	0.281465	0.0956023	0.506004
TEA033028.1	CsPPR210	562	E2	1	10	13	44	LPD	0.0582269	0.0875971	0.200128	0.654048
				2	46	49	75	FSD	0.216377	0.0793849	0.537585	0.166653
				3	113	116	146	VVG	0.194507	0.35828	0.0499482	0.397264
				4	148	151	177	SND	0.0700463	0.0450075	0.0475649	0.837381
				5	179	182	212	ISN	0.756056	0.057436	0.0606996	0.125809
				6	214	217	247	VID	0.089389	0.140769	0.144033	0.625809
				7	249	252	278	STD	0.196091	0.168302	0.467016	0.16859
				8	280	283	313	VVD	0.221065	0.191443	0.194468	0.393024
				9	315	318	348	IVN	0.394011	0.274394	0.0666528	0.264943
				10	350	353	379	FAD	0.172722	0.286603	0.414866	0.125809
				11	381	384	414	VSP	0.410663	0.113786	0.217831	0.25772
				12	452	455	483	TGG	0.281454	0.0899767	0.299264	0.329305
				13	485	488	517	NGH	0.281454	0.0899767	0.299264	0.329305
				14	519	522	551	GIK	0.131282	0.221931	0.175628	0.471159
TEA016763.1	CsPPR211	802	E2	1	27	30	61	IND	0.114257	0.114207	0.0767909	0.694746
				2	63	66	96	YSY	0.410663	0.113786	0.217831	0.25772
				3	98	101	127	HND	0.229065	0.202772	0.205457	0.362706
				4	129	132	158	YTS	0.732131	0.0630691	0.0666528	0.138148
				5	160	163	193	AND	0.0828682	0.0532461	0.0562716	0.807614
				6	195	198	227	YAR	0.289349	0.129794	0.261303	0.319555
				7	229	232	260	SND	0.0700463	0.0450075	0.0475649	0.837381
				8	262	265	295	INT	0.0871255	0.630232	0.0912528	0.19139
				9	297	300	327	LVC	0.346058	0.150072	0.0915474	0.412322
				10	329	332	358	SND	0.0700463	0.0450075	0.0475649	0.837381
				11	360	363	393	VND	0.0915966	0.198795	0.0806164	0.628992
				12	427	430	456	ENN	0.131056	0.390769	0.0606996	0.417475
				13	458	461	491	INN	0.149435	0.418265	0.0771099	0.355189
				14	493	496	526	YSE	0.410663	0.113786	0.217831	0.25772
				15	528	531	557	LND	0.089389	0.057436	0.227366	0.625809
				16	559	562	593	VND	0.0915966	0.198795	0.0806164	0.628992
				17	595	598	629	ATG	0.626468	0.0630691	0.172315	0.138148
				18	631	634	661	DSD	0.167192	0.111174	0.479736	0.241898
				19	663	666	695	NWN	0.25	0.25	0.25	0.25
				20	697	700	729	AVK	0.346058	0.150072	0.0915474	0.412322
TEA008013.1	CsPPR212	620	L1	1	123	126	152	FNN	0.13336	0.211041	0.366277	0.289322
				2	190	193	222	KVN	0.426343	0.161456	0.108135	0.304067
				3	224	227	253	ISD	0.110222	0.224103	0.394033	0.271642
				4	255	258	288	VTN	0.71082	0.11739	0.0778614	0.0939285
				5	290	293	323	FCD	0.196091	0.109127	0.309216	0.385566
				6	325	328	354	FTN	0.591919	0.0472627	0.0499482	0.31087
				7	356	359	389	VTN	0.71082	0.11739	0.0778614	0.0939285
				8	391	394	424	LVN	0.426343	0.161456	0.108135	0.304067
				9	426	429	455	YSD	0.186516	0.0532461	0.53996	0.220279
				10	457	460	490	VTN	0.71082	0.11739	0.0778614	0.0939285
				11	492	495	525	FSN	0.58017	0.0864832	0.0654684	0.267878
				12	527	530	556	YSN	0.679299	0.1159	0.0666528	0.138148
				13	558	561	591	VKD	0.089389	0.390769	0.144033	0.375809
				14	593	596	620	YTT	0.488246	0.150935	0.153621	0.207198
TEA030155.1	CsPPR213	938	DYW	1	25	28	58	KND	0.124525	0.143975	0.0680684	0.663432
				2	60	63	93	SPD	0.0582269	0.0875971	0.200128	0.654048
				3	95	98	124	RTD	0.177229	0.099099	0.568311	0.155361
				4	126	129	159	VNN	0.159753	0.422525	0.0863316	0.33139
				5	161	164	195	VVN	0.426343	0.161456	0.108135	0.304067
				6	197	200	225	HTN	0.711927	0.0719179	0.0946278	0.121527
				7	227	230	260	VND	0.0915966	0.198795	0.0806164	0.628992
				8	262	265	295	ILD	0.314442	0.405003	0.0527901	0.227765
				9	297	300	326	FND	0.256814	0.154636	0.0785667	0.509983
				10	328	331	362	ANE	0.0981559	0.327225	0.225146	0.349472
				11	364	367	397	TIT	0.0981559	0.380056	0.277978	0.24381
				12	399	402	428	YND	0.0621242	0.214539	0.0945721	0.628764
				13	430	433	463	INN	0.149435	0.418265	0.0771099	0.355189
				14	465	468	498	HIN	0.172722	0.265769	0.0606996	0.500809
				15	500	503	529	STD	0.196091	0.168302	0.467016	0.16859
				16	531	534	563	INN	0.149435	0.418265	0.0771099	0.355189
				17	565	568	600	VID	0.089389	0.140769	0.144033	0.625809
				18	602	605	631	SNN	0.128934	0.42177	0.102337	0.346959
				19	633	636	666	VNN	0.159753	0.422525	0.0863316	0.33139
				20	668	671	702	IVE	0.337875	0.0847437	0.149691	0.42769
				21	704	707	734	VGD	0.0863612	0.103718	0.547016	0.262904
				22	736	739	768	SRN	0.309481	0.168732	0.0666528	0.455135
				23	770	773	802	GVK	0.346058	0.150072	0.0915474	0.412322
				24	804	807	938	PSW	0.410663	0.113786	0.217831	0.25772
TEA007419.1	CsPPR214	446	E+	1	19	22	48	VTN	0.71082	0.11739	0.0778614	0.0939285
				2	85	88	114	PNN	0.13155	0.359876	0.172228	0.336346
				3	116	119	150	ITN	0.717509	0.0790148	0.0785136	0.124963
				4	152	155	185	GVG	0.194507	0.35828	0.0499482	0.397264
				5	187	190	218	FSD	0.216377	0.0793849	0.537585	0.166653
				6	220	223	253	INN	0.149435	0.418265	0.0771099	0.355189
				7	288	291	318	DSS	0.410663	0.113786	0.217831	0.25772
				8	320	323	352	SGN	0.503633	0.0844616	0.0426698	0.369235
				9	354	357	386	GMK	0.118448	0.208039	0.220201	0.453312
				10	388	391	446	PST	0.410663	0.113786	0.217831	0.25772
TEA013457.1	CsPPR215	686	E2	1	2	5	22	RKT	0.089389	0.390769	0.144033	0.375809
				2	24	27	53	FNN	0.13336	0.211041	0.366277	0.289322
				3	55	58	84	FND	0.256814	0.154636	0.0785667	0.509983
				4	86	89	122	VND	0.0915966	0.198795	0.0806164	0.628992
				5	124	127	157	FTN	0.591919	0.0472627	0.0499482	0.31087
				6	159	162	190	FSD	0.216377	0.0793849	0.537585	0.166653
				7	192	195	222	VND	0.0915966	0.198795	0.0806164	0.628992
				8	224	227	257	VNN	0.159753	0.422525	0.0863316	0.33139
				9	259	262	292	HAN	0.497597	0.0847437	0.128858	0.288801
				10	294	297	323	FSN	0.58017	0.0864832	0.0654684	0.267878
				11	325	328	354	FTN	0.591919	0.0472627	0.0499482	0.31087
				12	356	359	390	VTD	0.145694	0.0406957	0.659505	0.154106
				13	392	395	425	LID	0.193179	0.0911823	0.170698	0.544941
				14	427	430	456	KSD	0.167192	0.111174	0.479736	0.241898
				15	458	461	491	IND	0.114257	0.114207	0.0767909	0.694746
				16	493	496	527	VLE	0.089389	0.224103	0.0606996	0.625809
				17	529	532	559	DAD	0.173989	0.150753	0.380104	0.295154
				18	561	564	593	VGS	0.281454	0.0899767	0.299264	0.329305
				19	595	598	627	AVK	0.346058	0.150072	0.0915474	0.412322
TEA014990.1	CsPPR217	727	E2	1	20	23	54	LQL	0.25	0.25	0.25	0.25
				2	56	59	86	LND	0.089389	0.057436	0.227366	0.625809
				3	88	91	122	FND	0.256814	0.154636	0.0785667	0.509983
				4	124	127	157	YSN	0.679299	0.1159	0.0666528	0.138148
				5	159	162	188	FTS	0.399478	0.187965	0.119833	0.292723
				6	190	193	219	VTD	0.145694	0.0406957	0.659505	0.154106
				7	221	224	250	ANN	0.0828682	0.329639	0.0562716	0.531221
				8	252	255	281	VTN	0.71082	0.11739	0.0778614	0.0939285
				9	283	286	317	FND	0.256814	0.154636	0.0785667	0.509983
				10	319	322	352	VVA	0.309481	0.0630691	0.277978	0.349472
				11	354	357	383	NTE	0.322722	0.0907693	0.227366	0.359142
				12	385	388	418	ANN	0.0828682	0.329639	0.0562716	0.531221
				13	420	423	453	ILR	0.221949	0.221995	0.0411741	0.514882
				14	455	458	485	EGN	0.669493	0.0499517	0.0527901	0.227765
				15	487	490	519	ISN	0.756056	0.057436	0.0606996	0.125809
				16	521	524	553	GVK	0.346058	0.150072	0.0915474	0.412322
TEA016234.1	CsPPR218	487	E2	1	14	17	47	HAN	0.497597	0.0847437	0.128858	0.288801
				2	49	52	78	FNN	0.13336	0.211041	0.366277	0.289322
				3	80	83	113	HNY	0.116929	0.281465	0.0956023	0.506004
				4	155	158	184	AND	0.0828682	0.0532461	0.0562716	0.807614
				5	186	189	215	LTN	0.711927	0.0719179	0.0946278	0.121527
				6	217	220	251	VSN	0.670991	0.0949689	0.0638619	0.170178
				7	253	256	288	FVN	0.520491	0.122344	0.102337	0.254828
				8	290	293	319	FND	0.256814	0.154636	0.0785667	0.509983
				9	321	324	354	VNN	0.159753	0.422525	0.0863316	0.33139
				10	388	391	421	DTR	0.449355	0.0697129	0.331829	0.149103
				11	423	426	455	GGN	0.503633	0.0844616	0.0426698	0.369235
				12	457	460	487	AVG	0.194507	0.35828	0.0499482	0.397264
TEA024042.1	CsPPR219	532	E2	1	7	10	41	HPP	0.0761242	0.0872032	0.169197	0.667476
				2	43	46	72	ARN	0.309481	0.168732	0.0666528	0.455135
				3	74	77	108	YND	0.0621242	0.214539	0.0945721	0.628764
				4	110	113	143	YTD	0.393342	0.0499517	0.407841	0.148865
				5	145	148	174	FND	0.256814	0.154636	0.0785667	0.509983
				6	176	179	205	INN	0.149435	0.418265	0.0771099	0.355189
				7	207	210	236	ENN	0.131056	0.390769	0.0606996	0.417475
				8	238	241	271	VND	0.0915966	0.198795	0.0806164	0.628992
				9	273	276	306	FVD	0.0981559	0.168732	0.172315	0.560797
				10	308	311	337	FTD	0.089389	0.112992	0.449588	0.348031
				11	339	342	372	SNN	0.128934	0.42177	0.102337	0.346959
				12	374	377	408	VVT	0.432792	0.0499517	0.0527901	0.464466
				13	410	413	440	EGA	0.281454	0.0899767	0.299264	0.329305
				14	442	445	474	VED	0.25	0.25	0.25	0.25
				15	476	479	508	SVK	0.346058	0.150072	0.0915474	0.412322
TEA013021.1	CsPPR220	675	E2	1	21	24	53	ADS	0.25	0.25	0.25	0.25
				2	55	58	84	HST	0.410663	0.113786	0.217831	0.25772
				3	86	89	120	LND	0.089389	0.057436	0.227366	0.625809
				4	122	125	156	FPH	0.0761242	0.0872032	0.169197	0.667476
				5	158	161	187	FNS	0.115224	0.602357	0.0494072	0.233011
				6	189	192	222	VND	0.0915966	0.198795	0.0806164	0.628992
				7	224	227	257	VVN	0.426343	0.161456	0.108135	0.304067
				8	259	262	288	AND	0.0828682	0.0532461	0.0562716	0.807614
				9	290	293	323	VTN	0.71082	0.11739	0.0778614	0.0939285
				10	325	328	358	VAD	0.0777411	0.168302	0.467016	0.286941
				11	360	363	389	STR	0.449355	0.0697129	0.331829	0.149103
				12	391	394	424	VNN	0.159753	0.422525	0.0863316	0.33139
				13	426	429	459	AIK	0.131282	0.221931	0.175628	0.471159
				14	461	464	492	ESD	0.167192	0.111174	0.479736	0.241898
				15	494	497	527	IGN	0.503633	0.0844616	0.0426698	0.369235
				16	529	532	563	VTR	0.449355	0.0697129	0.331829	0.149103
				17	565	568	595	NTN	0.711927	0.0719179	0.0946278	0.121527
				18	597	600	629	AGN	0.503633	0.0844616	0.0426698	0.369235
				19	631	634	663	GVK	0.346058	0.150072	0.0915474	0.412322
TEA016409.1	CsPPR221	656	P2	1	102	105	134	IFD	0.25	0.25	0.25	0.25
				2	136	139	165	HNN	0.13155	0.359876	0.172228	0.336346
				3	167	170	200	VSN	0.670991	0.0949689	0.0638619	0.170178
				4	202	205	235	FVC	0.346058	0.150072	0.0915474	0.412322
				5	237	240	266	FND	0.256814	0.154636	0.0785667	0.509983
				6	268	271	302	AND	0.0828682	0.0532461	0.0562716	0.807614
				7	304	307	337	FSN	0.58017	0.0864832	0.0654684	0.267878
				8	339	342	368	SND	0.0700463	0.0450075	0.0475649	0.837381
				9	370	373	399	ITN	0.717509	0.0790148	0.0785136	0.124963
				10	401	404	434	VNT	0.0644279	0.661858	0.0437498	0.229965
				11	436	439	469	FTN	0.591919	0.0472627	0.0499482	0.31087
				12	471	474	502	CAS	0.41454	0.0532461	0.0562716	0.475942
				13	504	507	537	ITD	0.0644279	0.117372	0.499598	0.318602
				14	539	542	572	VAD	0.0777411	0.168302	0.467016	0.286941
				15	574	577	603	GND	0.089389	0.057436	0.0606996	0.792475
				16	605	608	638	VND	0.0915966	0.198795	0.0806164	0.628992
TEA007231.1	CsPPR222	712	E2	1	47	50	80	SVD	0.271123	0.173636	0.130355	0.424886
				2	82	85	111	SNT	0.0871255	0.630232	0.0912528	0.19139
				3	113	116	145	VTN	0.71082	0.11739	0.0778614	0.0939285
				4	147	150	180	FAD	0.172722	0.286603	0.414866	0.125809
				5	182	185	211	FND	0.256814	0.154636	0.0785667	0.509983
				6	213	216	246	VTN	0.71082	0.11739	0.0778614	0.0939285
				7	248	251	281	VLN	0.520806	0.0630691	0.0666528	0.349472
				8	283	286	312	LNG	0.290163	0.179926	0.12537	0.404541
				9	355	358	384	IND	0.114257	0.114207	0.0767909	0.694746
				10	386	389	423	IND	0.114257	0.114207	0.0767909	0.694746
				11	425	428	458	ILD	0.314442	0.405003	0.0527901	0.227765
				12	460	463	489	LND	0.089389	0.057436	0.227366	0.625809
				13	491	494	525	GNN	0.13155	0.359876	0.172228	0.336346
				14	527	530	561	IVR	0.0981559	0.0630691	0.0666528	0.772122
				15	563	566	593	EAG	0.290163	0.191443	0.263567	0.254828
				16	595	598	627	DGS	0.281454	0.0899767	0.299264	0.329305
				17	629	632	661	VVR	0.0981559	0.0630691	0.0666528	0.772122
TEA026173.1	CsPPR223	759	E2	1	67	70	102	QVL	0.346058	0.150072	0.0915474	0.412322
				2	104	107	133	VNN	0.159753	0.422525	0.0863316	0.33139
				3	135	138	168	FTD	0.089389	0.112992	0.449588	0.348031
				4	170	173	203	FSH	0.410663	0.113786	0.217831	0.25772
				5	205	208	234	FTN	0.591919	0.0472627	0.0499482	0.31087
				6	236	239	269	VNN	0.159753	0.422525	0.0863316	0.33139
				7	271	274	304	YIN	0.172722	0.265769	0.0606996	0.500809
				8	306	309	337	LTV	0.449355	0.0697129	0.331829	0.149103
				9	339	342	372	MND	0.124525	0.143975	0.0680684	0.663432
				10	374	377	408	YCF	0.403855	0.0618527	0.165418	0.368875
				11	410	413	439	SND	0.0700463	0.0450075	0.0475649	0.837381
				12	441	444	474	VTN	0.71082	0.11739	0.0778614	0.0939285
				13	476	479	509	FSD	0.216377	0.0793849	0.537585	0.166653
				14	511	514	540	CSD	0.167192	0.111174	0.479736	0.241898
				15	542	545	575	VTN	0.71082	0.11739	0.0778614	0.0939285
				16	577	580	611	VLK	0.089389	0.057436	0.0606996	0.792475
				17	613	616	643	EAN	0.497597	0.0847437	0.128858	0.288801
				18	645	648	677	MQY	0.25	0.25	0.25	0.25
				19	679	682	711	AVK	0.346058	0.150072	0.0915474	0.412322
TEA022262.1	CsPPR224	759	E2	1	67	70	102	QVL	0.346058	0.150072	0.0915474	0.412322
				2	104	107	133	VNN	0.159753	0.422525	0.0863316	0.33139
				3	135	138	168	FTD	0.089389	0.112992	0.449588	0.348031
				4	170	173	203	FSH	0.410663	0.113786	0.217831	0.25772
				5	205	208	234	FTN	0.591919	0.0472627	0.0499482	0.31087
				6	236	239	269	VNN	0.159753	0.422525	0.0863316	0.33139
				7	271	274	304	YIN	0.172722	0.265769	0.0606996	0.500809
				8	306	309	337	LTV	0.449355	0.0697129	0.331829	0.149103
				9	339	342	372	MND	0.124525	0.143975	0.0680684	0.663432
				10	374	377	408	YCF	0.403855	0.0618527	0.165418	0.368875
				11	410	413	439	SND	0.0700463	0.0450075	0.0475649	0.837381
				12	441	444	474	VTN	0.71082	0.11739	0.0778614	0.0939285
				13	476	479	509	FSD	0.216377	0.0793849	0.537585	0.166653
				14	511	514	540	CSD	0.167192	0.111174	0.479736	0.241898
				15	542	545	575	VTN	0.71082	0.11739	0.0778614	0.0939285
				16	577	580	611	VLK	0.089389	0.057436	0.0606996	0.792475
				17	613	616	643	EAN	0.497597	0.0847437	0.128858	0.288801
				18	645	648	677	MQY	0.25	0.25	0.25	0.25
				19	679	682	711	AVK	0.346058	0.150072	0.0915474	0.412322
TEA011401.1	CsPPR225	814	E+	1	120	123	156	QVL	0.346058	0.150072	0.0915474	0.412322
				2	158	161	187	VNN	0.159753	0.422525	0.0863316	0.33139
				3	189	192	222	FTD	0.089389	0.112992	0.449588	0.348031
				4	224	227	257	FSH	0.410663	0.113786	0.217831	0.25772
				5	259	262	288	FTN	0.591919	0.0472627	0.0499482	0.31087
				6	290	293	323	VNN	0.159753	0.422525	0.0863316	0.33139
				7	325	328	358	YIN	0.172722	0.265769	0.0606996	0.500809
				8	360	363	391	LTV	0.449355	0.0697129	0.331829	0.149103
				9	393	396	426	MND	0.124525	0.143975	0.0680684	0.663432
				10	428	431	462	YCF	0.403855	0.0618527	0.165418	0.368875
				11	464	467	493	SND	0.0700463	0.0450075	0.0475649	0.837381
				12	495	498	528	VTN	0.71082	0.11739	0.0778614	0.0939285
				13	530	533	563	FSD	0.216377	0.0793849	0.537585	0.166653
				14	565	568	594	CSD	0.167192	0.111174	0.479736	0.241898
				15	596	599	629	VTN	0.71082	0.11739	0.0778614	0.0939285
				16	631	634	665	VLK	0.089389	0.057436	0.0606996	0.792475
				17	667	670	697	EAN	0.497597	0.0847437	0.128858	0.288801
				18	699	702	731	MQY	0.25	0.25	0.25	0.25
				19	733	736	765	AVK	0.346058	0.150072	0.0915474	0.412322
				20	767	770	814	PSM	0.410663	0.113786	0.217831	0.25772
TEA031699.1	CsPPR226	539	E2	1	15	18	49	YPS	0.0981559	0.274394	0.0666528	0.560797
				2	51	54	80	FTD	0.089389	0.112992	0.449588	0.348031
				3	82	85	112	VNT	0.0644279	0.661858	0.0437498	0.229965
				4	114	117	147	VNN	0.159753	0.422525	0.0863316	0.33139
				5	149	152	182	FVN	0.520491	0.122344	0.102337	0.254828
				6	184	187	213	ITD	0.0644279	0.117372	0.499598	0.318602
				7	215	218	248	VSN	0.670991	0.0949689	0.0638619	0.170178
				8	250	253	283	VVN	0.426343	0.161456	0.108135	0.304067
				9	285	288	314	HSD	0.167192	0.111174	0.479736	0.241898
				10	316	319	349	VND	0.0915966	0.198795	0.0806164	0.628992
				11	351	354	385	IVK	0.346058	0.150072	0.0915474	0.412322
				12	387	390	417	EAN	0.497597	0.0847437	0.128858	0.288801
				13	419	422	451	VGN	0.520806	0.0630691	0.0666528	0.349472
				14	453	456	485	GVK	0.346058	0.150072	0.0915474	0.412322
TEA032718.1	CsPPR227	733	E2	1	71	74	100	LND	0.089389	0.057436	0.227366	0.625809
				2	138	141	171	FSS	0.410663	0.113786	0.217831	0.25772
				3	173	176	202	FSN	0.58017	0.0864832	0.0654684	0.267878
				4	204	207	237	VTD	0.145694	0.0406957	0.659505	0.154106
				5	239	242	272	YAS	0.41454	0.0532461	0.0562716	0.475942
				6	274	277	303	FND	0.256814	0.154636	0.0785667	0.509983
				7	305	308	338	VTN	0.71082	0.11739	0.0778614	0.0939285
				8	340	343	373	YAA	0.289349	0.129794	0.261303	0.319555
				9	375	378	404	SND	0.0700463	0.0450075	0.0475649	0.837381
				10	406	409	439	VST	0.410663	0.113786	0.217831	0.25772
				11	441	444	474	FAT	0.289349	0.129794	0.261303	0.319555
				12	476	479	505	MSD	0.167192	0.111174	0.479736	0.241898
				13	507	510	540	VTD	0.145694	0.0406957	0.659505	0.154106
				14	542	545	576	VIS	0.0981559	0.0630691	0.277978	0.560797
				15	578	581	608	EGD	0.0582269	0.0374131	0.701968	0.202392
				16	610	613	642	VSC	0.410663	0.113786	0.217831	0.25772
				17	644	647	676	GIK	0.131282	0.221931	0.175628	0.471159
TEA000006.1	CsPPR229	802	E2	1	54	57	88	QSS	0.312464	0.218163	0.0783481	0.391025
				2	90	93	121	SAS	0.41454	0.0532461	0.0562716	0.475942
				3	123	126	155	FND	0.256814	0.154636	0.0785667	0.509983
				4	157	160	190	HPD	0.0582269	0.0875971	0.200128	0.654048
				5	192	195	221	FND	0.256814	0.154636	0.0785667	0.509983
				6	223	226	257	VNN	0.159753	0.422525	0.0863316	0.33139
				7	259	262	292	VVQ	0.309481	0.0630691	0.0666528	0.560797
				8	294	297	323	TNN	0.0981559	0.274394	0.207536	0.419914
				9	325	328	358	VNN	0.159753	0.422525	0.0863316	0.33139
				10	360	363	393	VSD	0.373617	0.168302	0.348666	0.109415
				11	395	398	424	FNN	0.13336	0.211041	0.366277	0.289322
				12	426	429	459	VNN	0.159753	0.422525	0.0863316	0.33139
				13	461	464	494	LTD	0.089389	0.057436	0.727366	0.125809
				14	496	499	524	FND	0.256814	0.154636	0.0785667	0.509983
				15	526	529	559	IND	0.114257	0.114207	0.0767909	0.694746
				16	561	564	594	VVH	0.346058	0.150072	0.0915474	0.412322
				17	596	599	625	FND	0.256814	0.154636	0.0785667	0.509983
				18	627	630	660	AND	0.0828682	0.0532461	0.0562716	0.807614
				19	662	665	695	VIT	0.0981559	0.380056	0.277978	0.24381
				20	697	700	727	MAD	0.173989	0.150753	0.380104	0.295154
				21	729	732	761	SGH	0.281454	0.0899767	0.299264	0.329305
				22	763	766	795	GIK	0.131282	0.221931	0.175628	0.471159
TEA018471.1	CsPPR230	668	DYW	1	31	34	64	QID	0.193179	0.0911823	0.170698	0.544941
				2	99	102	132	FNN	0.13336	0.211041	0.366277	0.289322
				3	134	137	167	YPD	0.0828682	0.0532461	0.0562716	0.807614
				4	169	172	198	HSD	0.167192	0.111174	0.479736	0.241898
				5	200	203	229	VNN	0.159753	0.422525	0.0863316	0.33139
				6	231	234	260	GND	0.089389	0.057436	0.0606996	0.792475
				7	262	265	295	ISR	0.312464	0.218163	0.0783481	0.391025
				8	297	300	330	FSD	0.216377	0.0793849	0.537585	0.166653
				9	332	335	361	VTE	0.322722	0.0907693	0.227366	0.359142
				10	363	366	396	YNN	0.255267	0.138714	0.467016	0.139003
				11	398	401	432	IVK	0.346058	0.150072	0.0915474	0.412322
				12	434	437	464	EGN	0.669493	0.0499517	0.0527901	0.227765
				13	466	469	498	AGN	0.503633	0.0844616	0.0426698	0.369235
				14	500	503	532	GAT	0.289349	0.129794	0.261303	0.319555
				15	534	537	668	TSW	0.312464	0.218163	0.0783481	0.391025
TEA007164.1	CsPPR232	851	E2	1	67	70	102	QVL	0.346058	0.150072	0.0915474	0.412322
				2	104	107	133	VNN	0.159753	0.422525	0.0863316	0.33139
				3	135	138	168	FTD	0.089389	0.112992	0.449588	0.348031
				4	170	173	203	FSH	0.312464	0.218163	0.0783481	0.391025
				5	205	208	234	FTN	0.591919	0.0472627	0.0499482	0.31087
				6	236	239	269	VNN	0.159753	0.422525	0.0863316	0.33139
				7	271	274	304	YIN	0.172722	0.265769	0.0606996	0.500809
				8	306	309	337	LTV	0.449355	0.0697129	0.331829	0.149103
				9	339	342	372	MND	0.124525	0.143975	0.0680684	0.663432
				10	374	377	408	YCF	0.403855	0.0618527	0.165418	0.368875
				11	410	413	439	SND	0.0700463	0.0450075	0.0475649	0.837381
				12	441	444	474	VTN	0.71082	0.11739	0.0778614	0.0939285
				13	476	479	509	FSD	0.216377	0.0793849	0.537585	0.166653
				14	511	514	540	CSD	0.167192	0.111174	0.479736	0.241898
				15	542	545	575	VTN	0.71082	0.11739	0.0778614	0.0939285
				16	577	580	611	VLK	0.089389	0.057436	0.0606996	0.792475
				17	613	616	643	EAN	0.497597	0.0847437	0.128858	0.288801
				18	645	648	677	MQY	0.25	0.25	0.25	0.25
				19	679	682	711	AVK	0.346058	0.150072	0.0915474	0.412322
TEA010796.1	CsPPR234	754	E+	1	5	8	38	QAD	0.173989	0.150753	0.380104	0.295154
				2	40	43	69	MNN	0.13155	0.359876	0.172228	0.336346
				3	71	74	104	VTN	0.71082	0.11739	0.0778614	0.0939285
				4	106	109	139	FSY	0.312464	0.218163	0.0783481	0.391025
				5	141	144	170	VNS	0.114511	0.709302	0.0421855	0.134001
				6	172	175	205	IND	0.114257	0.114207	0.0767909	0.694746
				7	207	210	242	FTQ	0.449355	0.0697129	0.331829	0.149103
				8	244	247	273	IGS	0.281454	0.0899767	0.299264	0.329305
				9	275	278	308	ITD	0.0644279	0.117372	0.499598	0.318602
				10	310	313	343	FSD	0.216377	0.0793849	0.537585	0.166653
				11	345	348	374	SNN	0.128934	0.42177	0.102337	0.346959
				12	376	379	409	VTD	0.145694	0.0406957	0.659505	0.154106
				13	411	414	445	VLR	0.221949	0.221995	0.0411741	0.514882
				14	447	450	477	EAN	0.497597	0.0847437	0.128858	0.288801
				15	479	482	511	GQN	0.25	0.25	0.25	0.25
				16	513	516	545	VVK	0.346058	0.150072	0.0915474	0.412322
				17	547	550	754	ASQ	0.312464	0.218163	0.0783481	0.391025
TEA000228.1	CsPPR238	764	E2	1	33	36	67	QNK	0.116929	0.281465	0.0956023	0.506004
				2	69	72	102	SAD	0.173989	0.150753	0.380104	0.295154
				3	104	107	133	INN	0.149435	0.418265	0.0771099	0.355189
				4	135	138	168	VTD	0.145694	0.0406957	0.659505	0.154106
				5	170	173	203	FGH	0.281454	0.0899767	0.299264	0.329305
				6	205	208	234	IND	0.114257	0.114207	0.0767909	0.694746
				7	236	239	270	ISN	0.756056	0.057436	0.0606996	0.125809
				8	272	275	305	FGD	0.0863612	0.103718	0.547016	0.262904
				9	307	310	336	FCD	0.196091	0.109127	0.309216	0.385566
				10	338	341	371	VND	0.0915966	0.198795	0.0806164	0.628992
				11	373	376	406	IRG	0.309481	0.168732	0.0666528	0.455135
				12	408	411	438	AND	0.0828682	0.0532461	0.0562716	0.807614
				13	440	443	473	VND	0.0915966	0.198795	0.0806164	0.628992
				14	475	478	508	IVD	0.309481	0.485719	0.0666528	0.138148
				15	510	513	539	SNH	0.116929	0.281465	0.0956023	0.506004
				16	541	544	574	VSN	0.670991	0.0949689	0.0638619	0.170178
				17	576	579	610	VVS	0.413067	0.168302	0.0527901	0.365841
				18	612	615	642	ESD	0.167192	0.111174	0.479736	0.241898
				19	644	647	676	VKN	0.089389	0.390769	0.144033	0.375809
				20	678	681	710	AVK	0.346058	0.150072	0.0915474	0.412322
TEA027066.1	CsPPR239	686	DYW	1	12	15	41	HLD	0.194369	0.294012	0.0592154	0.452404
				2	43	46	76	LTD	0.089389	0.057436	0.727366	0.125809
				3	78	81	111	LLD	0.194369	0.294012	0.0592154	0.452404
				4	113	116	142	LND	0.089389	0.057436	0.227366	0.625809
				5	144	147	177	ITN	0.717509	0.0790148	0.0785136	0.124963
				6	179	182	212	ISN	0.756056	0.057436	0.0606996	0.125809
				7	214	217	243	FSD	0.216377	0.0793849	0.537585	0.166653
				8	245	248	278	VNN	0.159753	0.422525	0.0863316	0.33139
				9	280	283	313	ANN	0.0828682	0.329639	0.0562716	0.531221
				10	315	318	348	ITD	0.0644279	0.117372	0.499598	0.318602
				11	350	353	379	TTD	0.14601	0.064726	0.646665	0.142599
				12	381	384	414	ISN	0.756056	0.057436	0.0606996	0.125809
				13	452	455	482	ESK	0.312464	0.218163	0.0783481	0.391025
				14	484	487	516	GGN	0.503633	0.0844616	0.0426698	0.369235
				15	518	521	550	GVK	0.346058	0.150072	0.0915474	0.412322
				16	552	555	686	PSW	0.312464	0.218163	0.0783481	0.391025
TEA007392.1	CsPPR240	560	L1	1	16	19	49	LVS	0.413067	0.168302	0.0527901	0.365841
				2	83	86	116	YND	0.0621242	0.214539	0.0945721	0.628764
				3	118	121	151	YPD	0.0828682	0.0532461	0.0562716	0.807614
				4	153	156	182	YND	0.0621242	0.214539	0.0945721	0.628764
				5	184	187	217	VND	0.0915966	0.198795	0.0806164	0.628992
				6	219	222	252	FSD	0.216377	0.0793849	0.537585	0.166653
				7	254	257	283	IND	0.114257	0.114207	0.0767909	0.694746
				8	285	288	317	VND	0.0915966	0.198795	0.0806164	0.628992
				9	319	322	352	LGD	0.0863612	0.103718	0.547016	0.262904
				10	354	357	383	TND	0.254983	0.0472627	0.0499482	0.647806
				11	385	388	417	VND	0.0915966	0.198795	0.0806164	0.628992
				12	419	422	452	VVS	0.413067	0.168302	0.0527901	0.365841
				13	454	457	483	VND	0.0915966	0.198795	0.0806164	0.628992
				14	485	488	518	VND	0.0915966	0.198795	0.0806164	0.628992
				15	520	523	553	PLQ	0.221949	0.221995	0.0411741	0.514882
TEA025266.1	CsPPR241	870	E2	1	94	97	127	KSD	0.167192	0.111174	0.479736	0.241898
				2	129	132	158	HVD	0.271123	0.173636	0.130355	0.424886
				3	160	163	193	VTN	0.71082	0.11739	0.0778614	0.0939285
				4	195	198	228	FAD	0.172722	0.286603	0.414866	0.125809
				5	230	233	259	YSN	0.679299	0.1159	0.0666528	0.138148
				6	261	264	294	VNS	0.114511	0.709302	0.0421855	0.134001
				7	296	299	329	FSD	0.216377	0.0793849	0.537585	0.166653
				8	331	334	360	FCH	0.403855	0.0618527	0.165418	0.368875
				9	362	365	395	VAN	0.497597	0.0847437	0.128858	0.288801
				10	431	434	460	LND	0.089389	0.057436	0.227366	0.625809
				11	462	465	495	VND	0.0915966	0.198795	0.0806164	0.628992
				12	497	500	530	YIH	0.131282	0.221931	0.175628	0.471159
				13	532	535	561	HTD	0.309481	0.0630691	0.489303	0.138148
				14	563	566	596	LTN	0.711927	0.0719179	0.0946278	0.121527
				15	598	601	631	FSG	0.312464	0.218163	0.0783481	0.391025
				16	633	636	662	YSN	0.679299	0.1159	0.0666528	0.138148
				17	664	667	697	VND	0.0915966	0.198795	0.0806164	0.628992
				18	699	702	733	VIA	0.131282	0.221931	0.175628	0.471159
				19	735	738	765	EAN	0.497597	0.0847437	0.128858	0.288801
				20	767	770	799	LEM	0.25	0.25	0.25	0.25
				21	801	804	833	YIK	0.131282	0.221931	0.175628	0.471159
TEA013299.1	CsPPR242	850	E2	1	360	363	393	FTG	0.626468	0.0630691	0.172315	0.138148
				2	395	398	424	AND	0.0828682	0.0532461	0.0562716	0.807614
				3	426	429	459	FND	0.256814	0.154636	0.0785667	0.509983
				4	461	464	501	VTD	0.145694	0.0406957	0.659505	0.154106
				5	503	506	532	YND	0.0621242	0.214539	0.0945721	0.628764
				6	534	537	567	AND	0.0828682	0.0532461	0.0562716	0.807614
				7	569	572	603	VVT	0.432792	0.0499517	0.0527901	0.464466
				8	605	608	635	ETN	0.711927	0.0719179	0.0946278	0.121527
				9	637	640	669	VRH	0.309481	0.168732	0.0666528	0.455135
				10	671	674	703	GVK	0.346058	0.150072	0.0915474	0.412322
TEA026029.1	CsPPR243	631	E2	1	7	10	40	VTS	0.382294	0.0532461	0.12537	0.43909
				2	74	77	103	AND	0.0828682	0.0532461	0.0562716	0.807614
				3	105	108	138	VND	0.0915966	0.198795	0.0806164	0.628992
				4	140	143	173	QGD	0.0863612	0.103718	0.547016	0.262904
				5	175	178	204	HTD	0.309481	0.0630691	0.489303	0.138148
				6	206	209	239	ITS	0.399478	0.187965	0.119833	0.292723
				7	241	244	274	AAD	0.173989	0.150753	0.380104	0.295154
				8	276	279	305	TND	0.254983	0.0472627	0.0499482	0.647806
				9	307	310	340	VND	0.0915966	0.198795	0.0806164	0.628992
				10	342	345	375	IVC	0.346058	0.150072	0.0915474	0.412322
				11	377	380	406	LTD	0.089389	0.057436	0.727366	0.125809
				12	408	411	441	VSN	0.670991	0.0949689	0.0638619	0.170178
				13	443	446	477	VLK	0.089389	0.057436	0.0606996	0.792475
				14	479	482	509	EAT	0.289349	0.129794	0.261303	0.319555
				15	511	514	543	DGD	0.0863612	0.103718	0.547016	0.262904
				16	545	548	577	GLK	0.089389	0.057436	0.0606996	0.792475
TEA020813.1	CsPPR245	470	E2	1	7	10	41	VNN	0.159753	0.422525	0.0863316	0.33139
				2	43	46	75	AVT	0.432792	0.0499517	0.0527901	0.464466
				3	77	80	106	INN	0.149435	0.418265	0.0771099	0.355189
				4	108	111	137	ITD	0.0644279	0.117372	0.499598	0.318602
				5	139	142	172	VTD	0.145694	0.0406957	0.659505	0.154106
				6	174	177	207	FVD	0.0981559	0.168732	0.172315	0.560797
				7	209	212	238	VTD	0.145694	0.0406957	0.659505	0.154106
				8	240	243	273	ATD	0.089389	0.224103	0.5607	0.125809
				9	275	278	309	IIK	0.131282	0.221931	0.175628	0.471159
				10	311	314	344	EGV	0.281454	0.0899767	0.299264	0.329305
				11	346	349	378	PSD	0.167192	0.111174	0.479736	0.241898
				12	380	383	412	GTK	0.449355	0.0697129	0.331829	0.149103
TEA033188.1	CsPPR248	689	E+	1	86	89	119	TTY	0.449355	0.0697129	0.331829	0.149103
				2	121	124	150	VND	0.0915966	0.198795	0.0806164	0.628992
				3	152	155	185	VTN	0.71082	0.11739	0.0778614	0.0939285
				4	187	190	220	FSN	0.58017	0.0864832	0.0654684	0.267878
				5	222	225	251	YSN	0.679299	0.1159	0.0666528	0.138148
				6	253	256	286	VNT	0.0644279	0.661858	0.0437498	0.229965
				7	288	291	321	YSV	0.312464	0.218163	0.0783481	0.391025
				8	323	326	352	FND	0.256814	0.154636	0.0785667	0.509983
				9	354	357	387	VNN	0.159753	0.422525	0.0863316	0.33139
				10	389	392	422	ILE	0.0828682	0.191443	0.0562716	0.669418
				11	424	427	454	SVA	0.309481	0.0630691	0.277978	0.349472
				12	456	459	488	AGD	0.0863612	0.103718	0.547016	0.262904
				13	490	493	522	GVK	0.346058	0.150072	0.0915474	0.412322
				14	524	527	689	PSH	0.312464	0.218163	0.0783481	0.391025
TEA019535.1	CsPPR249	1070	DYW	1	119	122	152	KSD	0.167192	0.111174	0.479736	0.241898
				2	154	157	183	HVD	0.271123	0.173636	0.130355	0.424886
				3	185	188	218	VTN	0.71082	0.11739	0.0778614	0.0939285
				4	220	223	253	FAD	0.172722	0.286603	0.414866	0.125809
				5	255	258	284	YSN	0.679299	0.1159	0.0666528	0.138148
				6	320	323	353	FSD	0.216377	0.0793849	0.537585	0.166653
				7	355	358	384	FCD	0.196091	0.109127	0.309216	0.385566
				8	386	389	419	VTN	0.71082	0.11739	0.0778614	0.0939285
				9	455	458	484	LND	0.089389	0.057436	0.227366	0.625809
				10	486	489	519	VNN	0.159753	0.422525	0.0863316	0.33139
				11	521	524	554	YIN	0.172722	0.265769	0.0606996	0.500809
				12	556	559	585	FTD	0.089389	0.112992	0.449588	0.348031
				13	587	590	620	FTN	0.591919	0.0472627	0.0499482	0.31087
				14	622	625	655	FAD	0.172722	0.286603	0.414866	0.125809
				15	657	660	686	FSD	0.216377	0.0793849	0.537585	0.166653
				16	688	691	721	VND	0.0915966	0.198795	0.0806164	0.628992
				17	723	726	757	VLL	0.221949	0.221995	0.0411741	0.514882
				18	759	762	789	EAN	0.497597	0.0847437	0.128858	0.288801
				19	791	794	823	LET	0.25	0.25	0.25	0.25
				20	825	828	857	SIK	0.131282	0.221931	0.175628	0.471159
				21	859	862	1070	PSF	0.312464	0.218163	0.0783481	0.391025
TEA022254.1	CsPPR252	631	E2	1	7	10	40	VTS	0.382294	0.0532461	0.12537	0.43909
				2	74	77	103	AND	0.0828682	0.0532461	0.0562716	0.807614
				3	105	108	138	VND	0.0915966	0.198795	0.0806164	0.628992
				4	140	143	173	QGD	0.0863612	0.103718	0.547016	0.262904
				5	175	178	204	HTD	0.309481	0.0630691	0.489303	0.138148
				6	206	209	239	ITS	0.399478	0.187965	0.119833	0.292723
				7	241	244	274	AAD	0.173989	0.150753	0.380104	0.295154
				8	276	279	305	TND	0.254983	0.0472627	0.0499482	0.647806
				9	307	310	340	VND	0.0915966	0.198795	0.0806164	0.628992
				10	342	345	375	IIC	0.131282	0.221931	0.175628	0.471159
				11	377	380	406	LTD	0.089389	0.057436	0.727366	0.125809
				12	408	411	441	VSN	0.670991	0.0949689	0.0638619	0.170178
				13	443	446	477	VLK	0.089389	0.057436	0.0606996	0.792475
				14	479	482	509	EAT	0.289349	0.129794	0.261303	0.319555
				15	511	514	543	DGD	0.0863612	0.103718	0.547016	0.262904
				16	545	548	577	GLK	0.089389	0.057436	0.0606996	0.792475
TEA006188.1	CsPPR254	551	E2	1	2	5	18	ELN	0.589389	0.057436	0.0606996	0.292475
				2	20	23	49	YTS	0.732131	0.0630691	0.0666528	0.138148
				3	51	54	86	VTN	0.71082	0.11739	0.0778614	0.0939285
				4	88	91	121	FGN	0.503633	0.0844616	0.0426698	0.369235
				5	123	126	152	FSD	0.216377	0.0793849	0.537585	0.166653
				6	154	157	187	VND	0.0915966	0.198795	0.0806164	0.628992
				7	189	192	222	FGH	0.281454	0.0899767	0.299264	0.329305
				8	224	227	253	VGD	0.0863612	0.103718	0.547016	0.262904
				9	291	294	324	VCD	0.196091	0.109127	0.309216	0.385566
				10	326	329	355	ANN	0.0828682	0.329639	0.0562716	0.531221
				11	357	360	390	VTN	0.71082	0.11739	0.0778614	0.0939285
				12	392	395	426	VLR	0.221949	0.221995	0.0411741	0.514882
				13	428	431	458	ESN	0.701306	0.0675978	0.0428504	0.188245
				14	460	463	492	SGK	0.281454	0.0899767	0.299264	0.329305
				15	494	497	526	VVK	0.346058	0.150072	0.0915474	0.412322
TEA029711.1	CsPPR256	728	DYW	1	22	25	56	LHN	0.25	0.25	0.25	0.25
				2	58	61	87	LKP	0.089389	0.390769	0.144033	0.375809
				3	124	127	157	FPD	0.0828682	0.0993116	0.194468	0.623352
				4	159	162	188	FTD	0.089389	0.112992	0.449588	0.348031
				5	190	193	223	VSD	0.373617	0.168302	0.348666	0.109415
				6	225	228	258	MSD	0.167192	0.111174	0.479736	0.241898
				7	260	263	289	HSN	0.701306	0.0675978	0.0428504	0.188245
				8	291	294	320	VTD	0.145694	0.0406957	0.659505	0.154106
				9	322	325	355	VSD	0.373617	0.168302	0.348666	0.109415
				10	357	360	390	VLN	0.520806	0.0630691	0.0666528	0.349472
				11	392	395	421	PNN	0.13155	0.359876	0.172228	0.336346
				12	423	426	456	ITN	0.717509	0.0790148	0.0785136	0.124963
				13	458	461	492	VVK	0.346058	0.150072	0.0915474	0.412322
				14	494	497	524	EGN	0.669493	0.0499517	0.0527901	0.227765
				15	526	529	558	VGH	0.281454	0.0899767	0.299264	0.329305
				16	560	563	592	GVK	0.346058	0.150072	0.0915474	0.412322
				17	594	597	728	RSW	0.312464	0.218163	0.0783481	0.391025
TEA000524.1	CsPPR257	645	E2	1	3	6	39	YNN	0.255267	0.138714	0.467016	0.139003
				2	41	44	76	FPD	0.0828682	0.0993116	0.194468	0.623352
				3	78	81	107	FTN	0.591919	0.0472627	0.0499482	0.31087
				4	109	112	141	VNP	0.116929	0.281465	0.0956023	0.506004
				5	143	146	177	SFE	0.25	0.25	0.25	0.25
				6	179	182	210	PNS	0.115224	0.602357	0.0494072	0.233011
				7	212	215	245	VTD	0.145694	0.0406957	0.659505	0.154106
				8	247	250	287	IVN	0.394011	0.274394	0.0666528	0.264943
				9	289	292	318	PNS	0.115224	0.602357	0.0494072	0.233011
				10	320	323	353	FTN	0.591919	0.0472627	0.0499482	0.31087
				11	355	358	394	IAN	0.497597	0.0847437	0.128858	0.288801
				12	396	399	425	HAD	0.173989	0.150753	0.380104	0.295154
				13	427	430	461	ASD	0.167192	0.111174	0.479736	0.241898
				14	463	466	497	VTS	0.382294	0.0532461	0.12537	0.43909
				15	499	502	529	EWQ	0.25	0.25	0.25	0.25
				16	531	534	565	QAS	0.41454	0.0532461	0.0562716	0.475942
				17	567	570	599	SVE	0.337875	0.0847437	0.149691	0.42769
TEA024425.1	CsPPR261	696	E1	1	99	102	128	FND	0.256814	0.154636	0.0785667	0.509983
				2	130	133	163	GNN	0.13155	0.359876	0.172228	0.336346
				3	165	168	198	IAN	0.497597	0.0847437	0.128858	0.288801
				4	200	203	229	ISN	0.756056	0.057436	0.0606996	0.125809
				5	231	234	264	VNL	0.116929	0.281465	0.0956023	0.506004
				6	266	269	299	FSY	0.312464	0.218163	0.0783481	0.391025
				7	301	304	330	VSN	0.670991	0.0949689	0.0638619	0.170178
				8	332	335	361	ITN	0.717509	0.0790148	0.0785136	0.124963
				9	363	366	396	IND	0.114257	0.114207	0.0767909	0.694746
				10	398	401	431	VGN	0.520806	0.0630691	0.0666528	0.349472
[truncated: 2,415 more rows]
