# Supplementary material for: Exploring the RNA Editing Events and Their Potential Regulatory Roles in Tea Plant (Camellia sinensis L.)
Source: Int J Mol Sci. 2022 Nov 7;23(21):13640. doi: 10.3390/ijms232113640 (PMC9654872; doi:10.3390/ijms232113640)
Supplement: Supplementary file 1 [file ijms-23-13640-s001.zip › Table S6.xlsx]

## Sheet: Sheet1
Table S6. The calculation of “PPR-to-editing site” in the PLS-PPR of tea plants
Unigene ID	Gene name	RNA editing site	Strand	Start	End	p-value	q-value	Matched sequence
TEA010372.1	CsPPR7	nad5-377	+	5	24	4.44e-05	0.155	CCATTCCTACTTTTTTTATG
TEA010372.1	CsPPR7	nad5-362	+	20	39	4.44e-05	0.155	CCATTCCTACTTTTTTTATG
TEA010372.1	CsPPR7	nad5-361	+	21	40	4.44e-05	0.155	CCATTCCTACTTTTTTTATG
TEA016976.1	CsPPR24	ccmFn-1555	+	25	44	4.46e-05	0.478	TCCCGTTCATAGTTTTGCTA
TEA000802.1	CsPPR32	rps7-332	-	38	51	8.77e-05	1	GTAAGCATCCAGTA
TEA021212.1	CsPPR48	cox2-476	+	22	35	2.52e-05	0.166	CAATCACGTTTATT
TEA021212.1	CsPPR48	cox2-461	+	37	50	2.52e-05	0.166	CAATCACGTTTATT
TEA011148.1	CsPPR57	rpoC2-3728	+	8	28	2.99e-05	0.229	GAATGTCTAATGTTTTTTCAC
TEA011148.1	CsPPR57	ccmB-313	+	19	39	8.78e-05	0.229	TGTTTTCCGTGGTTTTCCCAT
TEA011148.1	CsPPR57	ccmB-304	+	28	48	8.78e-05	0.229	TGTTTTCCGTGGTTTTCCCAT
TEA011148.1	CsPPR57	nad5-551	+	29	49	8.98e-05	0.229	GTTGTTTTACTCTCTTTCAAA
TEA029317.1	CsPPR78	cox2-253	+	23	50	7.77e-05	0.61	CTTCGGACCATATTTCCTAGTATCATCC
TEA009314.1	CsPPR86	rpl5-172	-	36	51	2.18e-05	0.262	TGTGTCTGTATTAATT
TEA009314.1	CsPPR86	nad5-679	+	8	23	5.12e-05	0.307	CTTATTTGTATTTTAC
TEA033549.1	CsPPR87	ccmB-554	+	18	43	6.05e-05	0.255	TCTTTCATCGATTGGTTATTCCTCTC
TEA033549.1	CsPPR87	ccmB-551	+	21	46	6.05e-05	0.255	TCTTTCATCGATTGGTTATTCCTCTC
TEA033626.1	CsPPR90	nad5-634	+	13	32	1.51e-05	0.0844	TTCTTGGATTTCTCGCAATA
TEA033626.1	CsPPR90	nad5-632	+	15	34	1.51e-05	0.0844	TTCTTGGATTTCTCGCAATA
TEA033626.1	CsPPR90	ccmB-87	+	4	23	7.7e-05	0.172	TTTCTCCATTCCTCTCGTAT
TEA033626.1	CsPPR90	ccmB-80	+	11	30	7.7e-05	0.172	TTTCTCCATTCCTCTCGTAT
TEA033626.1	CsPPR90	ccmB-71	+	20	39	7.7e-05	0.172	TTTCTCCATTCCTCTCGTAT
TEA006781.1	CsPPR96	nad5-377	+	9	23	8.6e-05	0.359	TCCTACTTTTTTTAT
TEA006781.1	CsPPR96	nad5-362	+	24	38	8.6e-05	0.359	TCCTACTTTTTTTAT
TEA006781.1	CsPPR96	nad5-361	+	25	39	8.6e-05	0.359	TCCTACTTTTTTTAT
TEA024417.1	CsPPR97	nad5-634	+	13	32	1.51e-05	0.0844	TTCTTGGATTTCTCGCAATA
TEA024417.1	CsPPR97	nad5-632	+	15	34	1.51e-05	0.0844	TTCTTGGATTTCTCGCAATA
TEA024417.1	CsPPR97	ccmB-87	+	4	23	7.7e-05	0.172	TTTCTCCATTCCTCTCGTAT
TEA024417.1	CsPPR97	ccmB-80	+	11	30	7.7e-05	0.172	TTTCTCCATTCCTCTCGTAT
TEA024417.1	CsPPR97	ccmB-71	+	20	39	7.7e-05	0.172	TTTCTCCATTCCTCTCGTAT
TEA006727.1	CsPPR98	ccmFc-1133	-	21	37	9.63e-05	1	GATCCGTAAATGGATTT
TEA028850.1	CsPPR102	ccmB-28	-	12	35	7.12e-05	0.664	TCTGTTTATGATATAGTTCAAGAA
TEA016226.1	CsPPR106	matK-701	-	7	30	3.15e-05	0.294	TCCAGAAGATATTGATCGTAAATG
TEA005080.1	CsPPR111	ndhD-887	-	36	50	4.99e-05	0.614	CTTTTTTTTAAATTA
TEA009633.1	CsPPR113	ndhD-383	+	3	24	2.17e-05	0.219	AATGTACAGCGGTCAAATAGGA
TEA006974.1	CsPPR114	psbF-77	+	22	36	7.41e-05	0.935	GTTTCTTTTTTGGGG
TEA001667.1	CsPPR115	matR-1722	-	24	43	6.17e-05	0.463	ACAATCGTTCGGACTTGGTA
TEA001667.1	CsPPR115	matK-701	+	12	31	8.39e-05	0.463	ACGATCAATATCTTCTGGAA
TEA014568.1	CsPPR118	ccmFn-1555	+	27	44	1.15e-05	0.097	CCGTTCATAGTTTTGCTA
TEA014568.1	CsPPR118	cob-298	+	8	25	2.52e-05	0.097	ATGTTTCTCATTGTGGTT
TEA014568.1	CsPPR118	cob-286	+	20	37	2.52e-05	0.097	ATGTTTCTCATTGTGGTT
TEA014568.1	CsPPR118	ndhB-149	-	34	51	6.75e-05	0.176	AGGTATATCTTTTTGATC
TEA014568.1	CsPPR118	nad3-43	+	2	19	7.62e-05	0.176	ATTTGTATCTATTTAGTG
TEA013120.1	CsPPR126	rps8-182	+	7	24	8.95e-05	0.495	AAAAATTTTTTTTTGGTT
TEA013120.1	CsPPR126	ndhD-1310	-	3	20	9.02e-05	0.495	GATAATAAATAAATAGGA
TEA002480.1	CsPPR137	cox2-698	-	25	42	7.09e-05	0.304	TTCTACGACGATAGGCGT
TEA002480.1	CsPPR137	ndhB-611	+	8	25	7.99e-05	0.304	TCTCTTGGCTATATGGTT
TEA002480.1	CsPPR137	ndhB-586	+	33	50	7.99e-05	0.304	TCTCTTGGCTATATGGTT
TEA001858.1	CsPPR138	atpA-791	+	15	34	3.7e-05	0.3	TTATGATGATCCATCCAAAC
TEA001858.1	CsPPR138	atp4-118	-	31	50	5.67e-05	0.3	ATATGATAAAGCCTATAAAA
TEA016729.1	CsPPR141	rpl5-92	-	33	45	6.89e-05	0.604	TACTACTCTTATT
TEA016729.1	CsPPR141	ndhF-290	+	29	41	9.37e-05	0.604	TACTAATCACTAC
TEA022566.1	CsPPR143	matK-701	+	3	21	5.13e-05	0.576	TTCTCATTTACGATCAATA
TEA008809.1	CsPPR145	nad5-275	+	4	24	1.86e-05	0.19	GTGATGTTAATTGTGGTTACA
TEA008809.1	CsPPR145	nad5-245	+	25	45	7.11e-05	0.363	CCGACCGTAGTGATGTTAATT
TEA008010.1	CsPPR146	nad5-362	+	9	33	5.98e-06	0.0269	GTGTTATTTATCCATTCCTACTTTT
TEA008010.1	CsPPR146	nad5-361	+	10	34	5.98e-06	0.0269	GTGTTATTTATCCATTCCTACTTTT
TEA008010.1	CsPPR146	atp6-254	+	14	38	4.58e-05	0.137	CTTTTACTTTTTCGTTATTTCGTAA
TEA024551.1	CsPPR147	rps18-221	+	32	51	2.6e-05	0.196	CTTTTCTTAATAATGAGAAA
TEA024551.1	CsPPR147	cox2-443	+	2	21	3.73e-05	0.196	AGTCACTCACTTTTGACAGT
TEA024551.1	CsPPR147	cox2-443	+	6	25	5.79e-05	0.202	ACTCACTTTTGACAGTTATA
TEA013903.1	CsPPR148	matR-1688	+	14	37	2.23e-05	0.168	TTGCGATAAGTCCTCTGTCCTACT
TEA013903.1	CsPPR148	atp6-254	+	11	34	3.62e-05	0.168	TTACTTTTACTTTTTCGTTATTTC
TEA013903.1	CsPPR148	rpoC2-2849	+	4	27	9.78e-05	0.302	ATTTTGTCATCATCCAATTGTTCT
TEA028996.1	CsPPR149	cob-325	+	3	22	1.06e-05	0.0574	TTCATATTTTTCGTGGTCTA
TEA028996.1	CsPPR149	cob-298	+	30	49	1.06e-05	0.0574	TTCATATTTTTCGTGGTCTA
TEA028996.1	CsPPR149	ndhC-40	+	4	23	3.37e-05	0.122	ATATGATATTTTTTGGGCAT
TEA028996.1	CsPPR149	rps8-182	+	6	25	5.76e-05	0.156	CAAAAATTTTTTTTTGGTTT
TEA028996.1	CsPPR149	atpF-92	-	12	31	9.98e-05	0.216	TTATTGGATTTGTTGCTAAA
TEA028085.1	CsPPR152	cox2-379	+	20	33	8.25e-05	1	TGGTATCGGACTTA
TEA017378.1	CsPPR158	ndhB-586	+	8	25	8.88e-06	0.103	AGCTCTTCTATTCTGGTT
TEA017378.1	CsPPR158	sdh3-74	+	4	21	6.99e-05	0.271	CTCACTTCGACGTTTCCA
TEA017378.1	CsPPR158	sdh3-67	+	11	28	6.99e-05	0.271	CTCACTTCGACGTTTCCA
TEA020885.1	CsPPR161	atp1-1292	-	28	42	1.41e-05	0.124	ATATTGTGGTTGTTT
TEA020885.1	CsPPR161	nad3-43	+	12	26	1.98e-05	0.124	ATTTAGTGATCAGTC
TEA031229.1	CsPPR162	atp4-251	-	29	46	5.19e-05	0.298	GTTGTTGTTCATTGGATT
TEA031229.1	CsPPR162	atp4-248	-	32	49	5.19e-05	0.298	GTTGTTGTTCATTGGATT
TEA031229.1	CsPPR162	cox2-742	+	15	32	9.2e-05	0.352	ATTATGGTTCTCGGGTAT
TEA010878.1	CsPPR164	cob-568	-	4	25	3.06e-05	0.308	ATGAAGACTAAAAAAACGATTT
TEA017894.1	CsPPR166	ccmB-494	-	8	31	1.68e-06	0.00415	GCAATGAAGTAGGTGAAGTGGTTG
TEA017894.1	CsPPR166	ccmB-485	-	17	40	1.68e-06	0.00415	GCAATGAAGTAGGTGAAGTGGTTG
TEA017894.1	CsPPR166	ccmB-476	-	26	49	1.68e-06	0.00415	GCAATGAAGTAGGTGAAGTGGTTG
TEA017894.1	CsPPR166	ccmB-475	-	27	50	1.68e-06	0.00415	GCAATGAAGTAGGTGAAGTGGTTG
TEA024641.1	CsPPR168	rpl10-341	+	8	33	9.78e-07	0.00872	TGGACCAAGATCTGCTTTCATTATAT
TEA020138.1	CsPPR169	rps2-134	-	23	41	6.74e-05	0.757	GTTCTAGTAAGATTTGTAA
TEA005780.1	CsPPR171	atp6-254	+	15	29	2.71e-06	0.034	TTTTACTTTTTCGTT
TEA005780.1	CsPPR171	ndhB-586	+	10	24	5.5e-05	0.253	CTCTTCTATTCTGGT
TEA005780.1	CsPPR171	nad5-679	+	18	32	6.05e-05	0.253	TTTTACTTCTTATTG
TEA000701.1	CsPPR173	ccmFc-1154	+	20	39	2.36e-06	0.0262	ATGCTTCGATTGGAACTGGA
TEA000701.1	CsPPR173	ccmFc-1133	+	5	24	7.58e-05	0.42	AAGTGGCTATACATACAAAT
TEA000744.1	CsPPR175	ccmB-494	-	9	31	2.17e-07	0.00055	GCAATGAAGTAGGTGAAGTGGTT
TEA000744.1	CsPPR175	ccmB-485	-	18	40	2.17e-07	0.00055	GCAATGAAGTAGGTGAAGTGGTT
TEA000744.1	CsPPR175	ccmB-476	-	27	49	2.17e-07	0.00055	GCAATGAAGTAGGTGAAGTGGTT
TEA000744.1	CsPPR175	ccmB-475	-	28	50	2.17e-07	0.00055	GCAATGAAGTAGGTGAAGTGGTT
TEA006311.1	CsPPR176	ndhA-341	-	3	17	4.59e-05	0.286	AATAAAATGGATATG
TEA006311.1	CsPPR176	cob-808	-	5	19	4.62e-05	0.286	ATTAGCAGGTATATA
TEA006311.1	CsPPR176	nad5-401	-	21	35	8.51e-05	0.352	AATTGAAGAGAGTTA
TEA011339.1	CsPPR179	ndhB-611	+	2	20	6.82e-05	0.394	ATGGTTTCTCTTGGCTATA
TEA011339.1	CsPPR179	ndhB-586	+	27	45	6.82e-05	0.394	ATGGTTTCTCTTGGCTATA
TEA004430.1	CsPPR180	ndhB-467	+	30	43	4.81e-07	0.00621	ATGTTTCAGTTTAT
TEA004430.1	CsPPR180	ndhK-81	+	20	33	9.17e-06	0.0593	TTGGTTCAGTTTAT
TEA008724.1	CsPPR181	rpl5-521	-	18	33	2.2e-05	0.139	GCTCCACGGTGGTAAA
TEA008724.1	CsPPR181	rpl5-518	-	21	36	2.2e-05	0.139	GCTCCACGGTGGTAAA
TEA032939.1	CsPPR188	ndhB-467	+	30	44	4.27e-05	0.281	ATGTTTCAGTTTATG
TEA032939.1	CsPPR188	ccmFn-1423	+	20	34	4.46e-05	0.281	ATGCCTCGGGTATTA
TEA032767.1	CsPPR189	nad5-634	-	11	26	8.08e-05	0.26	GAGAAATCCAAGAATT
TEA032767.1	CsPPR189	nad5-632	-	13	28	8.08e-05	0.26	GAGAAATCCAAGAATT
TEA032767.1	CsPPR189	nad5-611	-	34	49	8.08e-05	0.26	GAGAAATCCAAGAATT
TEA032767.1	CsPPR189	ndhA-341	+	18	33	8.84e-05	0.26	AAGTTATTCAATAATT
TEA022153.1	CsPPR191	ccmFn-1486	+	6	20	3.42e-06	0.0439	TTCTTCATTCTTGGA
TEA022153.1	CsPPR191	ndhC-40	-	27	41	2.44e-05	0.13	GGCTTGATATTATTA
TEA022153.1	CsPPR191	ccmFn-1486	+	27	41	3.03e-05	0.13	TTCTTAATATTGTGA
TEA022153.1	CsPPR191	atp4-89	-	28	42	7.09e-05	0.18	TTCTTCATTATAGAT
TEA022153.1	CsPPR191	ndhK-81	+	10	24	7.12e-05	0.18	ATCTTAATTGTTGGT
TEA022153.1	CsPPR191	cox2-253	-	7	21	8.41e-05	0.18	ATCTCGATAGTAGTT
TEA014200.1	CsPPR192	atp4-71	+	6	21	3.33e-05	0.202	TATTCTATCTATTTGT
TEA014200.1	CsPPR192	atp4-59	+	18	33	3.33e-05	0.202	TATTCTATCTATTTGT
TEA014200.1	CsPPR192	ccmB-286	+	3	18	7.83e-05	0.316	TACTTCTACAATTGGT
TEA001365.1	CsPPR196	nad5-362	+	3	22	9.09e-05	0.487	ATTTATGTGTTATTTATCCA
TEA001365.1	CsPPR196	nad5-361	+	4	23	9.09e-05	0.487	ATTTATGTGTTATTTATCCA
TEA031323.1	CsPPR197	nad5-362	+	7	24	1.97e-05	0.111	ATGTGTTATTTATCCATT
TEA031323.1	CsPPR197	nad5-361	+	8	25	1.97e-05	0.111	ATGTGTTATTTATCCATT
TEA014447.1	CsPPR198	cob-568	+	10	22	2.33e-05	0.181	TTTTTTTAGTCTT
TEA014447.1	CsPPR198	ndhB-467	+	30	42	2.77e-05	0.181	ATGTTTCAGTTTA
TEA014447.1	CsPPR198	psbZ-50	+	33	45	7.08e-05	0.31	ATTGATTAGTGTA
TEA010023.1	CsPPR200	psbZ-50	-	2	20	3.27e-06	0.0367	GTAGCAATTAATGCAAAAA
TEA018728.1	CsPPR201	rpl10-341	-	24	43	6.13e-05	0.372	GGTATTGCCCATATAATGAA
TEA018728.1	CsPPR201	cox2-278	+	30	49	7.25e-05	0.372	GTTCATTGCTATACCATCAT
TEA011253.1	CsPPR202	nad41-149	+	27	41	9.67e-05	1	ATTTGCTTCATTGGT
TEA026277.1	CsPPR203	atp6-254	+	11	31	2.2e-05	0.0482	TTACTTTTACTTTTTCGTTAT
TEA026277.1	CsPPR203	ccmB-554	+	10	30	2.62e-05	0.0482	TTTCATGTTCTTTCATCGATT
TEA026277.1	CsPPR203	ccmB-551	+	13	33	2.62e-05	0.0482	TTTCATGTTCTTTCATCGATT
TEA026277.1	CsPPR203	cob-298	+	13	33	2.76e-05	0.0482	TCTCATTGTGGTTCACCTTCA
TEA026277.1	CsPPR203	cob-286	+	25	45	2.76e-05	0.0482	TCTCATTGTGGTTCACCTTCA
TEA026277.1	CsPPR203	cob-680	+	27	47	2.97e-05	0.0482	TTACCCTTATTTTTATGTAAA
TEA026277.1	CsPPR203	ccmB-514	+	21	41	3.66e-05	0.0482	TTTCTCGTACCTCTATTGAAA
TEA026277.1	CsPPR203	ccmB-512	+	23	43	3.66e-05	0.0482	TTTCTCGTACCTCTATTGAAA
TEA026277.1	CsPPR203	cob-568	+	10	30	7.04e-05	0.0824	TTTTTTTAGTCTTCATCATTT
TEA004779.1	CsPPR208	atp1-1039	+	7	24	3.39e-05	0.246	TATTCCCACCAATGTGAT
TEA004779.1	CsPPR208	nad5-401	+	22	39	4.92e-05	0.246	AACTCTCTTCAATTATTC
TEA004779.1	CsPPR208	cox2-742	+	29	46	6.62e-05	0.246	GTATCTAATCAATTAATC
TEA033028.1	CsPPR210	nad5-728	+	33	46	8.89e-06	0.114	TGCTATGGAGGGTC
TEA033028.2	CsPPR211	rpl5-172	+	10	23	4.43e-05	0.155	GGCTATGGAGATTC
TEA033028.3	CsPPR212	rpl5-169	+	13	26	4.43e-05	0.155	GGCTATGGAGATTC
TEA033028.4	CsPPR213	atp6-548	+	38	51	4.85e-05	0.155	TGCTATGTATGAAT
TEA007419.1	CsPPR214	rpoA-200	+	4	13	4.13e-05	0.593	ACATGTATTA
TEA014990.1	CsPPR217	cob-178	-	13	28	3.66e-05	0.43	GTGATGCATAGCTAAA
TEA024042.1	CsPPR219	psaI-80	+	21	35	1.85e-05	0.231	TTTATCTCTTCATGT
TEA024042.1	CsPPR219	atp6-37	+	31	45	4.4e-05	0.276	TTTGTTTATGCTGCT
TEA024042.1	CsPPR219	atp6-37	+	25	39	9.94e-05	0.415	TCCATCTTTGTTTAT
TEA013021.1	CsPPR220	rps18-221	+	33	51	4.68e-05	0.512	TTTTCTTAATAATGAGAAA
TEA016409.1	CsPPR221	atp6-254	+	11	26	8.22e-05	0.978	TTACTTTTACTTTTTC
TEA026173.1	CsPPR223	ccmB-80	-	6	24	4.95e-06	0.027	AAGATCTGTTTATGATATA
TEA026173.1	CsPPR223	ccmB-28	-	21	39	4.95e-06	0.027	AAGATCTGTTTATGATATA
TEA026173.1	CsPPR223	atpA-791	+	6	24	1.56e-05	0.0558	TTTAATCATTTATGATGAT
TEA026173.1	CsPPR223	nad41-101	+	25	43	2.05e-05	0.0558	TCGAACTTTTTGGTATTTT
TEA022262.1	CsPPR224	ccmB-43	-	6	24	4.95e-06	0.027	AAGATCTGTTTATGATATA
TEA022262.1	CsPPR224	ccmB-28	-	21	39	4.95e-06	0.027	AAGATCTGTTTATGATATA
TEA022262.1	CsPPR224	atpA-791	+	6	24	1.56e-05	0.0558	TTTAATCATTTATGATGAT
TEA022262.1	CsPPR224	nad41-101	+	25	43	2.05e-05	0.0558	TCGAACTTTTTGGTATTTT
TEA011401.1	CsPPR225	ccmB-43	-	5	24	5.69e-06	0.03	AAGATCTGTTTATGATATAG
TEA011401.1	CsPPR225	ccmB-28	-	20	39	5.69e-06	0.03	AAGATCTGTTTATGATATAG
TEA011401.1	CsPPR225	atpA-791	+	6	25	4.51e-05	0.152	TTTAATCATTTATGATGATC
TEA011401.1	CsPPR225	nad41-101	+	25	44	5.76e-05	0.152	TCGAACTTTTTGGTATTTTC
TEA031699.1	CsPPR226	matK-701	-	18	31	2.92e-05	0.299	TTCCAGAAGATATT
TEA031699.1	CsPPR226	ndhD-1310	+	28	41	4.69e-05	0.299	CGCCAGATGTTCTA
TEA032718.1	CsPPR227	cob-118	+	3	19	1.3e-05	0.153	TTAGTTATTGGTGGGGG
TEA032718.1	CsPPR227	rps1-107	+	7	23	5.45e-05	0.319	TTTGAGAATAAGGTGGG
TEA000006.1	CsPPR229	atp6-254	+	15	36	2.45e-06	0.0249	TTTTACTTTTTCGTTATTTCGT
TEA000006.1	CsPPR229	cob-1015	+	1	22	5.91e-05	0.299	AATTTTTTGGTTGCTTTTGGCG
TEA018471.1	CsPPR230	nad5-611	+	10	24	2.06e-05	0.253	TTTGCTTGTGCTAGT
TEA007164.1	CsPPR232	ccmB-43	-	6	24	8.25e-06	0.0452	AAGATCTGTTTATGATATA
TEA007164.1	CsPPR232	ccmB-28	-	21	39	8.25e-06	0.0452	AAGATCTGTTTATGATATA
TEA007164.1	CsPPR232	atpA-791	+	6	24	2.48e-05	0.0879	TTTAATCATTTATGATGAT
TEA007164.1	CsPPR232	nad41-101	+	25	43	3.21e-05	0.0879	TCGAACTTTTTGGTATTTT
TEA010796.1	CsPPR234	cox2-557	-	20	36	6.49e-05	0.399	CCAACTATGAGGTACAT
TEA010796.1	CsPPR234	cox2-544	-	33	49	6.49e-05	0.399	CCAACTATGAGGTACAT
TEA000228.1	CsPPR238	rps18-221	+	24	43	3.78e-05	0.245	TTCGTTACCTTTTCTTAATA
TEA000228.1	CsPPR238	atp1-1415	+	12	31	6.2e-05	0.245	TGAGAGAGCCATTCCAAGTA
TEA000228.1	CsPPR238	matK-445	+	4	23	6.76e-05	0.245	TGTGTTAGATATACTAATAC
TEA007392.1	CsPPR240	atp6-254	+	19	33	6.05e-06	0.0745	ACTTTTTCGTTATTT
TEA007392.1	CsPPR240	psaI-80	-	36	50	1.38e-05	0.0848	ATTTTGTTTTTTTGA
TEA007392.1	CsPPR240	nad5-838	+	36	50	4.27e-05	0.176	CTTTGATTGTTATTA
TEA026029.1	CsPPR243	cox2-379	+	8	23	7.18e-05	0.869	ATTGGACATCAATGGT
TEA020813.1	CsPPR245	rpl5-521	-	18	29	1.54e-05	0.109	CACGGTGGTAAA
TEA020813.1	CsPPR245	rpl5-518	-	21	32	1.54e-05	0.109	CACGGTGGTAAA
TEA020813.1	CsPPR245	atpB-23	+	36	47	5.6e-05	0.264	TTCTGTGCTTGA
TEA019535.1	CsPPR249	ccmFn-1423	-	30	50	4.53e-05	0.488	GAATACGAGCTGTGGCTAATA
TEA022254.1	CsPPR252	cox2-379	+	8	23	4.25e-05	0.376	ATTGGACATCAATGGT
TEA022254.1	CsPPR252	cox2-163	+	3	18	9.26e-05	0.376	TTCTGATTTTGGTTTT
TEA022254.1	CsPPR252	cox2-161	+	5	20	9.26e-05	0.376	TTCTGATTTTGGTTTT
TEA006188.1	CsPPR254	nad6-446	-	11	25	1.59e-05	0.191	AATAGTAGGTATAAA
TEA006188.1	CsPPR254	cox2-278	-	37	51	3.33e-05	0.2	AAATGATGGTATAGC
TEA006188.1	CsPPR254	nad5-509	+	3	17	5.6e-05	0.224	TAAAGCAGCTATAAA
TEA006188.1	CsPPR254	rps2-134	+	10	24	8.44e-05	0.253	AAAGGTATTCATATT
TEA000524.1	CsPPR257	rpl10-101	-	33	49	2.84e-05	0.332	GTTTTCGCCATTGGTTA
TEA024425.1	CsPPR261	rpl5-172	-	28	45	5.7e-05	0.223	TGTATTAATTTCTGACCG
TEA024425.1	CsPPR261	rpl5-169	-	31	48	5.7e-05	0.223	TGTATTAATTTCTGACCG
TEA024425.1	CsPPR261	ndhB-467	+	4	21	5.89e-05	0.223	TTAATAACTATCTTTGTA
TEA006652.1	CsPPR263	ccmFn-1423	-	6	20	1.9e-06	0.0236	TAAAAGAAGCATTTT
TEA006652.1	CsPPR263	ndhA-341	-	25	39	5.04e-05	0.313	AAAAGGAATTATTGA
TEA006652.1	CsPPR263	atp6-548	+	3	17	9.25e-05	0.383	TTCAGTAAAGATTTT
TEA017974.1	CsPPR264	cob-118	+	3	24	1.98e-06	0.0122	TTAGTTATTGGTGGGGGTTCGG
TEA017974.1	CsPPR264	psbF-77	+	20	41	2.42e-06	0.0122	CCGTTTCTTTTTTGGGGTCAAT
TEA017974.1	CsPPR264	matK-1234	-	30	51	6.54e-05	0.164	CTCGTTTTTTTTGAGGATCCGC
TEA017974.1	CsPPR264	cob-325	+	2	23	8.54e-05	0.164	CTTCATATTTTTCGTGGTCTAT
TEA017974.1	CsPPR264	cob-298	+	29	50	8.54e-05	0.164	CTTCATATTTTTCGTGGTCTAT
TEA017974.1	CsPPR264	ndhC-40	+	6	27	9.78e-05	0.164	ATGATATTTTTTGGGCATTTCT
TEA004150.1	CsPPR265	nad5-679	+	28	44	3.83e-06	0.0452	TATTGGTGCTGTTGGGA
TEA004150.1	CsPPR265	rpoC1-62	+	18	34	3.42e-05	0.15	AATTGGATCAGTTTCTC
TEA004150.1	CsPPR265	atp6-548	+	18	34	3.82e-05	0.15	AAGTGGGTCCGCTTGGA
TEA029275.1	CsPPR266	psaI-80	-	35	49	9.3e-06	0.0743	TTTTGTTTTTTTGAA
TEA029275.1	CsPPR266	cox2-742	-	31	45	1.21e-05	0.0743	ATTAATTGATTAGAT
TEA014107.1	CsPPR269	nad6-446	+	6	22	7.53e-05	0.862	TTTACTTTATACCTACT
TEA022603.1	CsPPR271	atp4-118	-	3	22	2.66e-05	0.0897	TACTATCATTTCTTCATTAT
TEA022603.1	CsPPR271	atp4-89	-	32	51	2.66e-05	0.0897	TACTATCATTTCTTCATTAT
TEA022603.1	CsPPR271	rps2-248	-	2	21	3.35e-05	0.0897	AGCTACTTTATTTTTGGTAC
TEA022603.1	CsPPR271	atp4-59	+	12	31	3.37e-05	0.0897	TGCTGCTATTCTATCTATTT
TEA022603.1	CsPPR271	atp6-254	+	12	31	4.53e-05	0.0964	TACTTTTACTTTTTCGTTAT
TEA014188.1	CsPPR273	matK-1234	-	1	15	1.96e-05	0.101	AGATTTCTATATATA
TEA014188.1	CsPPR273	sdh3-74	+	21	35	2.52e-05	0.101	AATTTCCCATAGAAT
TEA014188.1	CsPPR273	sdh3-67	+	28	42	2.52e-05	0.101	AATTTCCCATAGAAT
TEA025338.1	CsPPR275	cob-568	-	6	24	7.89e-05	0.306	TGAAGACTAAAAAAACGAT
TEA025338.1	CsPPR275	atp4-406	-	4	22	8.29e-05	0.306	TGTTGCTGACTTAACATTT
TEA025338.1	CsPPR275	atp4-395	-	15	33	8.29e-05	0.306	TGTTGCTGACTTAACATTT
TEA012873.1	CsPPR277	cob-1015	+	1	18	2.78e-05	0.125	AATTTTTTGGTTGCTTTT
TEA012873.1	CsPPR277	cob-982	+	34	51	2.78e-05	0.125	AATTTTTTGGTTGCTTTT
TEA012873.1	CsPPR277	ndhB-586	+	21	38	3.62e-05	0.125	TGGTTCATGGTTTCTCTT
TEA012873.1	CsPPR277	rps8-182	+	13	30	4.37e-05	0.125	TTTTTTTTGGTTTCAACC
TEA012873.1	CsPPR277	ccmB-313	+	21	38	8.23e-05	0.126	TTTTCCGTGGTTTTCCCA
TEA012873.1	CsPPR277	ccmB-304	+	30	47	8.23e-05	0.126	TTTTCCGTGGTTTTCCCA
TEA012873.1	CsPPR277	cob-298	+	11	28	8.89e-05	0.126	TTTCTCATTGTGGTTCAC
TEA012873.1	CsPPR277	cob-286	+	23	40	8.89e-05	0.126	TTTCTCATTGTGGTTCAC
TEA012873.1	CsPPR277	cob-325	+	9	26	9.95e-05	0.126	TTTTTCGTGGTCTATATC
TEA016674.1	CsPPR278	ccmB-338	+	3	19	1.66e-05	0.0974	TGGTTTTCCCATGTTAC
TEA016674.1	CsPPR278	ccmB-313	+	28	44	1.66e-05	0.0974	TGGTTTTCCCATGTTAC
TEA016674.1	CsPPR278	atp6-254	+	15	31	2.61e-05	0.102	TTTTACTTTTTCGTTAT
TEA016674.1	CsPPR278	cob-568	+	27	43	4.18e-05	0.122	ATTTACTCCCCTTTATT
TEA020784.1	CsPPR280	cox2-461	+	12	24	7.03e-05	0.471	TCCAGAAGATGAT
TEA020784.1	CsPPR280	cox2-443	+	30	42	7.03e-05	0.471	TCCAGAAGATGAT
TEA016867.1	CsPPR283	ndhA-341	+	5	24	8.07e-08	0.000835	TATCCATTTTATTAAGTTAT
TEA016867.1	CsPPR283	psbZ-50	+	23	42	6.21e-05	0.321	CATCAATCTTATTGATTAGT
TEA016309.1	CsPPR284	atp4-251	+	9	19	3.65e-05	0.164	TAACGAAGTAG
TEA016309.1	CsPPR284	atp4-248	+	12	22	3.65e-05	0.164	TAACGAAGTAG
TEA016309.1	CsPPR284	atp4-227	+	33	43	3.65e-05	0.164	TAACGAAGTAG
TEA004321.1	CsPPR287	rpoC2-2849	-	4	20	3.78e-05	0.434	TTGGATGATGACAAAAT
TEA033438.1	CsPPR290	atpA-914	+	6	21	2.63e-05	0.318	TTTGGAAAGAGCCGCT
TEA033438.1	CsPPR290	matK-1234	-	29	44	5.12e-05	0.318	TTTTTGAGGATCCGCT
TEA013645.1	CsPPR291	atpA-914	+	6	21	2.63e-05	0.318	TTTGGAAAGAGCCGCT
TEA013645.1	CsPPR291	matK-1234	-	29	44	5.12e-05	0.318	TTTTTGAGGATCCGCT
TEA020416.1	CsPPR293	nad5-245	+	30	45	6.2e-06	0.0747	CGTAGTGATGTTAATT
TEA013307.1	CsPPR294	rpl10-239	-	31	46	7.76e-05	0.973	ATGCTTCTTCGGCCAA
TEA008632.1	CsPPR295	cob-298	-	26	37	4.1e-05	0.278	AATATGAAGGTG
TEA008632.1	CsPPR295	cob-286	-	38	49	4.1e-05	0.278	AATATGAAGGTG
TEA003331.1	CsPPR298	ndhC-40	-	30	44	2.94e-05	0.368	TAATATCAAGCCTTA
TEA014313.1	CsPPR299	cox2-632	+	3	18	3.09e-05	0.0828	TCGTTTAAATCAGACC
TEA014313.1	CsPPR299	ccmB-160	+	4	19	4.79e-05	0.0828	CCATTTAGGTCCGATT
TEA014313.1	CsPPR299	ccmB-154	+	10	25	4.79e-05	0.0828	CCATTTAGGTCCGATT
TEA014313.1	CsPPR299	ccmB-149	+	15	30	4.79e-05	0.0828	CCATTTAGGTCCGATT
TEA014313.1	CsPPR299	ccmB-148	+	16	31	4.79e-05	0.0828	CCATTTAGGTCCGATT
TEA014313.1	CsPPR299	ccmB-137	+	27	42	4.79e-05	0.0828	CCATTTAGGTCCGATT
TEA014313.1	CsPPR299	ccmB-128	+	36	51	4.79e-05	0.0828	CCATTTAGGTCCGATT
TEA014313.1	CsPPR299	ndhD-887	-	31	46	5.36e-05	0.0828	TTTTTAAATTACGTTG
TEA006262.1	CsPPR301	matR-1775	-	29	43	6.91e-06	0.0872	ATTTGTGCTTGTGGG
TEA006262.1	CsPPR301	psaI-80	-	35	49	1.84e-05	0.116	TTTTGTTTTTTTGAA
TEA029742.1	CsPPR302	ndhA-341	+	9	25	1.81e-05	0.201	CATTTTATTAAGTTATT
TEA029742.1	CsPPR302	rps8-182	+	10	26	9.25e-05	0.365	AATTTTTTTTTGGTTTC
TEA029742.1	CsPPR302	cob-680	+	35	51	9.86e-05	0.365	ATTTTTATGTAAAGGAT
TEA007247.1	CsPPR303	atpF-92	-	19	37	5.23e-05	0.587	TTAGATTTATTGGATTTGT
TEA020301.1	CsPPR305	nad5-679	+	17	39	4.05e-05	0.395	ATTTTACTTCTTATTGGTGCTGT
TEA032757.1	CsPPR307	cox2-476	-	5	16	1.74e-05	0.0788	ATTCTGGATCAT
TEA032757.1	CsPPR307	cox2-461	-	20	31	1.74e-05	0.0788	ATTCTGGATCAT
TEA032757.1	CsPPR307	cox2-443	-	38	49	1.74e-05	0.0788	ATTCTGGATCAT
TEA032757.1	CsPPR307	atp4-118	-	3	14	2.99e-05	0.0812	TTTCTTCATTAT
TEA032757.1	CsPPR307	atp4-89	-	32	43	2.99e-05	0.0812	TTTCTTCATTAT
TEA032757.1	CsPPR307	psbZ-50	+	2	13	4.4e-05	0.0995	TTTTTGCATTAA
TEA023820.1	CsPPR311	atpA-791	-	7	23	1.86e-05	0.177	TCATCATAAATGATTAA
TEA023820.1	CsPPR311	atp4-89	-	25	41	3.88e-05	0.177	TCTTCATTATAGATTGA
TEA023820.1	CsPPR311	atpA-791	+	11	27	4.39e-05	0.177	TCATTTATGATGATCCA
TEA006789.1	CsPPR312	rps8-182	+	11	24	1.13e-05	0.145	ATTTTTTTTTGGTT
TEA006789.1	CsPPR312	psaI-80	-	38	51	2.77e-05	0.152	AATTTTGTTTTTTT
TEA006789.1	CsPPR312	nad5-551	+	22	35	4.75e-05	0.152	ATTTCGGGTTGTTT
TEA006789.1	CsPPR312	nad5-542	+	31	44	4.75e-05	0.152	ATTTCGGGTTGTTT
TEA006789.1	CsPPR312	cob-1015	+	3	16	7.56e-05	0.162	TTTTTTGGTTGCTT
TEA006789.1	CsPPR312	cob-982	+	36	49	7.56e-05	0.162	TTTTTTGGTTGCTT
TEA011436.1	CsPPR313	ndhH-505	+	15	30	2.32e-05	0.155	CTGATCTACCTCATGG
TEA011436.1	CsPPR313	matR-1688	+	28	43	2.46e-05	0.155	CTGTCCTACTACAGGT
TEA011909.1	CsPPR315	cox2-476	-	21	36	1.21e-05	0.0749	TAATAAACGTGATTGA
TEA011909.1	CsPPR315	cox2-461	-	36	51	1.21e-05	0.0749	TAATAAACGTGATTGA
TEA011909.1	CsPPR315	cob-325	+	7	22	4.28e-05	0.12	TATTTTTCGTGGTCTA
TEA011909.1	CsPPR315	cob-298	+	34	49	4.28e-05	0.12	TATTTTTCGTGGTCTA
TEA011909.1	CsPPR315	rpl5-92	-	21	36	4.88e-05	0.12	TATTTTACACGATCCA
TEA004145.1	CsPPR316	cox2-544	+	9	23	2.97e-05	0.374	TACGTATTATTGTAA
TEA004145.1	CsPPR316	rps12-100	-	36	50	8.7e-05	0.549	GTGTTCTCGTTGAAA
TEA004844.1	CsPPR318	rps8-182	+	5	16	1.25e-06	0.0164	GCAAAAATTTTT
TEA028910.1	CsPPR323	rps1-56	-	35	48	4.84e-05	0.62	TCGGTTGATTGGCA
TEA031829.1	CsPPR324	psbZ-50	-	26	37	4.5e-05	0.615	TCAATAAGATTG
TEA015817.1	CsPPR325	nad5-679	+	20	31	1.41e-06	0.0188	TTACTTCTTATT
TEA015817.1	CsPPR325	ccmB-179	+	13	24	1.21e-05	0.0268	TTGTTTCCTTTT
TEA015817.1	CsPPR325	ccmB-172	+	20	31	1.21e-05	0.0268	TTGTTTCCTTTT
TEA015817.1	CsPPR325	ccmB-164	+	28	39	1.21e-05	0.0268	TTGTTTCCTTTT
TEA015817.1	CsPPR325	ccmB-160	+	32	43	1.21e-05	0.0268	TTGTTTCCTTTT
TEA015817.1	CsPPR325	ccmB-154	+	38	49	1.21e-05	0.0268	TTGTTTCCTTTT
TEA015817.1	CsPPR325	nad3-43	+	3	14	7.86e-05	0.145	TTTGTATCTATT
TEA015817.1	CsPPR325	atp4-71	+	7	18	9.79e-05	0.145	ATTCTATCTATT
TEA015817.1	CsPPR325	atp4-59	+	19	30	9.79e-05	0.145	ATTCTATCTATT
TEA033676.1	CsPPR326	ndhD-674	+	11	25	2.01e-05	0.241	CTTTTGCTGTCAAAT
TEA017251.1	CsPPR327	ndhA-341	+	10	24	2.22e-05	0.275	ATTTTATTAAGTTAT
TEA017251.1	CsPPR327	ndhF-290	+	9	23	9.49e-05	0.589	ACTTACTTCTATTAT
TEA003885.1	CsPPR328	ccmB-80	-	7	16	4.34e-06	0.0306	GAGAAAAACT
TEA003885.1	CsPPR328	ccmB-71	-	16	25	4.34e-06	0.0306	GAGAAAAACT
TEA003885.1	CsPPR328	nad5-551	-	31	40	5.29e-05	0.187	GAGTAAAACA
TEA003885.1	CsPPR328	nad5-542	-	40	49	5.29e-05	0.187	GAGTAAAACA
TEA003885.1	CsPPR328	atp6-37	-	6	15	8.37e-05	0.197	GAGAAATACA
TEA003885.1	CsPPR328	cob-680	-	34	43	8.37e-05	0.197	CATAAAAATA
TEA020605.1	CsPPR331	ndhD-674	-	32	49	5.68e-05	0.636	ATGTATGTAAGGGTATAA
TEA016949.1	CsPPR334	nad5-679	+	20	31	1.41e-06	0.0188	TTACTTCTTATT
TEA016949.1	CsPPR334	ccmB-179	+	13	24	1.21e-05	0.0268	TTGTTTCCTTTT
TEA016949.1	CsPPR334	ccmB-172	+	20	31	1.21e-05	0.0268	TTGTTTCCTTTT
TEA016949.1	CsPPR334	ccmB-164	+	28	39	1.21e-05	0.0268	TTGTTTCCTTTT
TEA016949.1	CsPPR334	ccmB-160	+	32	43	1.21e-05	0.0268	TTGTTTCCTTTT
TEA016949.1	CsPPR334	ccmB-154	+	38	49	1.21e-05	0.0268	TTGTTTCCTTTT
TEA016949.1	CsPPR334	nad3-43	+	3	14	7.86e-05	0.145	TTTGTATCTATT
TEA016949.1	CsPPR334	atp4-71	+	7	18	9.79e-05	0.145	ATTCTATCTATT
TEA016949.1	CsPPR334	atp4-59	+	19	30	9.79e-05	0.145	ATTCTATCTATT
TEA021574.1	CsPPR335	petB-611	+	5	17	4.5e-05	0.6	TATTTATGTTAAT
TEA030022.1	CsPPR336	nad5-245	+	27	42	5.99e-05	0.377	GACCGTAGTGATGTTA
TEA030022.1	CsPPR336	cob-118	+	28	43	6.23e-05	0.377	GTTAGCTGGTATTTGT
TEA015564.1	CsPPR337	nad5-155	-	10	25	2.23e-05	0.274	GTGCGACTTCATAAAA
TEA030260.1	CsPPR338	ndhH-505	+	7	20	1.98e-05	0.232	AATAGCTGCTGATC
TEA030260.1	CsPPR338	atp4-416	-	2	15	7.08e-05	0.232	AAGTGTTGCTGACT
TEA030260.1	CsPPR338	atp4-406	-	12	25	7.08e-05	0.232	AAGTGTTGCTGACT
TEA030260.1	CsPPR338	atp4-395	-	23	36	7.08e-05	0.232	AAGTGTTGCTGACT
TEA032238.1	CsPPR340	rps12-196	+	12	25	5.68e-05	0.719	ATGATATATTTGCT
TEA002628.1	CsPPR341	cox2-698	+	35	49	5.69e-05	0.731	TCGTAGAAGCTGTTT
TEA019365.1	CsPPR342	cox2-698	+	35	49	5.69e-05	0.731	TCGTAGAAGCTGTTT
TEA002127.1	CsPPR344	cob-914	+	28	40	3.28e-05	0.217	ATATGTCTGTTGG
TEA002127.1	CsPPR344	cob-908	+	34	46	3.28e-05	0.217	ATATGTCTGTTGG
TEA027488.1	CsPPR345	ndhC-40	+	4	19	4.35e-05	0.519	ATATGATATTTTTTGG
TEA028602.1	CsPPR346	atp9-92	+	18	29	8.07e-05	0.44	TAGTTCCTCGAT
TEA028602.1	CsPPR346	atp9-82	+	28	39	8.07e-05	0.44	TAGTTCCTCGAT
TEA028602.1	CsPPR346	nad3-43	+	30	41	9.76e-05	0.44	TAGTTTCTTTGA
TEA010352.1	CsPPR347	ccmFc-1133	+	5	17	8.59e-05	1	AAGTGGCTATACA
TEA012090.1	CsPPR349	cob-982	-	23	35	6.57e-05	0.865	TTCCTTGGTGAAT
TEA026018.1	CsPPR353	matK-445	+	8	22	9.73e-06	0.0647	TTAGATATACTAATA
TEA026018.1	CsPPR353	rpl5-92	-	35	49	1.03e-05	0.0647	TTGGTACTACTCTTA
TEA026018.1	CsPPR353	ndhC-40	+	17	31	8.89e-05	0.371	TGGGCATTTCTAATA
TEA032241.1	CsPPR355	rps12-196	+	12	25	5.68e-05	0.719	ATGATATATTTGCT
TEA021868.1	CsPPR357	atp6-37	+	28	41	8.61e-05	1	ATCTTTGTTTATGC
TEA029652.1	CsPPR359	cob-568	-	21	32	3.76e-05	0.517	GTAAATGATGAA
TEA013301.1	CsPPR360	cob-178	-	12	27	1.78e-05	0.208	TGATGCATAGCTAAAA
TEA013301.1	CsPPR360	ndhA-341	-	15	30	6.78e-05	0.396	TATTGAATAACTTAAT
TEA015278.1	CsPPR361	rpoC2-3728	+	38	50	1.97e-05	0.0937	TAATTGGATTGTT
TEA015278.1	CsPPR361	ccmB-514	+	34	46	2.14e-05	0.0937	TATTGAAACAGAA
TEA015278.1	CsPPR361	ccmB-512	+	36	48	2.14e-05	0.0937	TATTGAAACAGAA
TEA015278.1	CsPPR361	nad41-101	-	3	15	4.6e-05	0.151	TAATAACATTGAT
TEA031659.1	CsPPR362	ccmB-28	-	12	23	3.56e-05	0.485	ATAGTTCAAGAA
TEA021069.1	CsPPR364	cob-568	+	2	16	7.5e-05	0.919	TTAAATCGTTTTTTT
TEA025732.1	CsPPR367	cob-178	-	12	27	1.78e-05	0.208	TGATGCATAGCTAAAA
TEA025732.1	CsPPR367	ndhA-341	-	15	30	6.78e-05	0.396	TATTGAATAACTTAAT
TEA024291.1	CsPPR369	cob-178	+	11	24	3.54e-05	0.246	TTTTTAGCTATGCA
TEA024291.1	CsPPR369	atp1-1178	-	24	37	3.94e-05	0.246	ATTCCAGTTTTGAA
TEA033772.1	CsPPR370	rpoC1-62	-	17	29	5.36e-05	0.382	ACTGATCCAATTC
TEA033772.1	CsPPR370	matK-701	-	8	20	5.76e-05	0.382	ATTGATCGTAAAT
TEA016844.1	CsPPR371	matK-1234	+	11	26	8.18e-05	0.947	AATCTTTCTCATTATC
TEA011397.1	CsPPR372	atp6-548	+	3	17	1.75e-06	0.0211	TTCAGTAAAGATTTT
TEA011397.1	CsPPR372	cox2-742	+	5	19	1.17e-05	0.0705	TCTAGGAAAGATTAT
TEA011397.1	CsPPR372	nad5-716	+	9	23	5.16e-05	0.207	ATCTGCACAGATAGG
TEA020845.1	CsPPR373	nad6-446	+	30	42	3.09e-05	0.417	CTGGTTTTTGGTT
TEA001547.1	CsPPR376	rpoC1-62	-	17	29	5.36e-05	0.382	ACTGATCCAATTC
TEA001547.1	CsPPR376	matK-701	-	8	20	5.76e-05	0.382	ATTGATCGTAAAT
TEA025739.1	CsPPR377	matR-1688	+	31	44	2.75e-05	0.355	TCCTACTACAGGTG
TEA033215.1	CsPPR379	matK-701	-	10	24	9.07e-06	0.111	AGATATTGATCGTAA
TEA027110.1	CsPPR380	atp4-251	-	31	43	5.44e-05	0.363	GTTGTTCATTGGA
TEA027110.1	CsPPR380	atp4-248	-	34	46	5.44e-05	0.363	GTTGTTCATTGGA
TEA007090.1	CsPPR381	cob-1015	+	2	16	5.88e-05	0.223	ATTTTTTGGTTGCTT
TEA007090.1	CsPPR381	cob-982	+	35	49	5.88e-05	0.223	ATTTTTTGGTTGCTT
TEA007090.1	CsPPR381	cob-419	+	9	23	6.67e-05	0.223	TTTTATAGGATACGT
TEA007090.1	CsPPR381	cob-358	+	8	22	8.14e-05	0.223	AGTCCTAGGGAATTT
TEA007090.1	CsPPR381	atp1-1415	-	27	41	8.81e-05	0.223	GGTTTTACACTACTT
TEA023349.1	CsPPR382	cob-178	-	23	36	3.08e-05	0.4	TGAGGTGTGTGATG
TEA011638.1	CsPPR383	cox2-698	+	29	41	5.7e-06	0.0614	CTATCGTCGTAGA
TEA011638.1	CsPPR383	sdh3-74	-	7	19	1.42e-05	0.0614	GAAACGTCGAAGT
TEA011638.1	CsPPR383	sdh3-67	-	14	26	1.42e-05	0.0614	GAAACGTCGAAGT
TEA014515.1	CsPPR389	ndhB-149	-	5	19	3.74e-05	0.461	TCATCAGAAGAAGAA
TEA014515.1	CsPPR389	rpoC2-2849	+	37	51	7.71e-05	0.475	CCATTCAATGATGTA
TEA010422.1	CsPPR390	ndhB-1481	+	2	14	3.55e-05	0.477	TATGTGTGATAGC
TEA010422.1	CsPPR390	rpl5-450	-	24	36	7.09e-05	0.477	TATGTTCGAAGAT
TEA006083.1	CsPPR393	ndhB-467	+	24	35	6.11e-05	0.808	TCCAGAATGTTT
TEA024193.1	CsPPR398	atp4-118	+	6	19	5.71e-06	0.036	ATGAAGAAATGATA
TEA024193.1	CsPPR398	atp4-89	+	35	48	5.71e-06	0.036	ATGAAGAAATGATA
TEA024193.1	CsPPR398	rps18-221	-	29	42	1.08e-05	0.0454	ATTAAGAAAAGGTA
TEA025545.1	CsPPR400	rps12-196	-	16	27	3.64e-05	0.482	TGAGCAAATATA
TEA032581.1	CsPPR402	ccmB-137	-	6	20	8.21e-05	0.37	CATGAAAAGTCTTTT
TEA032581.1	CsPPR402	ccmB-128	-	15	29	8.21e-05	0.37	CATGAAAAGTCTTTT
TEA032581.1	CsPPR402	cox2-379	+	32	46	9.33e-05	0.37	TATGAGTATTCGGAC
TEA013737.1	CsPPR403	cox2-278	+	29	42	4.86e-05	0.567	TGTTCATTGCTATA
TEA013737.1	CsPPR403	cob-178	-	13	26	9.06e-05	0.567	GATGCATAGCTAAA
TEA027677.1	CsPPR405	ndhC-40	-	7	20	3.84e-05	0.307	CCCAAAAAATATCA
TEA027677.1	CsPPR405	rpl5-172	+	30	43	7.43e-05	0.307	GTCAGAAATTAATA
TEA027677.1	CsPPR405	rpl5-169	+	33	46	7.43e-05	0.307	GTCAGAAATTAATA
TEA005808.1	CsPPR406	atp9-20	-	32	45	1.1e-05	0.143	AATTGTAGCAGCTC
TEA005808.1	CsPPR406	ccmFc-1154	-	17	30	7.39e-05	0.32	AATCGAAGCATATA
TEA005808.1	CsPPR406	ccmFc-1133	-	38	51	7.39e-05	0.32	AATCGAAGCATATA
TEA012811.1	CsPPR408	psbE-214	+	10	26	6.74e-05	0.809	AACTGGCCGTTTTGATC
TEA004838.1	CsPPR409	rps1-56	-	36	48	1.58e-05	0.212	TCGGTTGATTGGC
TEA004838.1	CsPPR409	atp4-251	-	31	43	7.77e-05	0.346	GTTGTTCATTGGA
TEA004838.1	CsPPR409	atp4-248	-	34	46	7.77e-05	0.346	GTTGTTCATTGGA
TEA030510.1	CsPPR418	rpoA-200	-	36	48	2.16e-05	0.241	ATATTCGTGTGGT
TEA030510.1	CsPPR418	ndhB-1481	-	38	50	6.04e-05	0.241	ATAATCGGGTTCA
TEA030510.1	CsPPR418	cox2-581	+	5	17	7.26e-05	0.241	ATAGTTGGGCTGT
TEA030510.1	CsPPR418	cox2-557	+	29	41	7.26e-05	0.241	ATAGTTGGGCTGT
TEA030510.1	CsPPR418	ndhB-467	-	21	33	8.96e-05	0.241	ACATTCTGGAGCT
TEA028012.1	CsPPR420	psaI-80	+	37	49	1.8e-05	0.123	CAAAAAAACAAAA
TEA028012.1	CsPPR420	rps2-248	+	6	18	1.96e-05	0.123	CAAAAATAAAGTA
TEA028012.1	CsPPR420	cob-325	-	2	14	4.51e-05	0.139	GAAAAATATGAAG
TEA028012.1	CsPPR420	cob-298	-	29	41	4.51e-05	0.139	GAAAAATATGAAG
TEA028012.1	CsPPR420	nad5-377	-	12	24	8.52e-05	0.139	CATAAAAAAAGTA
TEA028012.1	CsPPR420	nad5-362	-	27	39	8.52e-05	0.139	CATAAAAAAAGTA
TEA028012.1	CsPPR420	nad5-361	-	28	40	8.52e-05	0.139	CATAAAAAAAGTA
TEA028012.1	CsPPR420	rps8-182	-	9	21	8.85e-05	0.139	CAAAAAAAAATTT
TEA022313.1	CsPPR421	ndhF-290	+	36	49	1.21e-05	0.157	CACTACTGTTGGAA
TEA022313.1	CsPPR421	rps1-56	-	23	36	3.05e-05	0.198	CACTCCTGTAGGCT
TEA022313.1	CsPPR421	ndhD-674	+	6	19	8.41e-05	0.316	TATTGCTTTTGCTG
TEA022313.1	CsPPR421	psaI-80	-	2	15	9.74e-05	0.316	CATTGCAATTGCCG
TEA006792.1	CsPPR423	cox2-632	-	36	48	3.77e-05	0.308	GTAAACTCCTTCT
TEA006792.1	CsPPR423	cob-680	+	15	27	5.58e-05	0.308	TAAAATTGCTTCT
TEA006792.1	CsPPR423	nad5-679	+	1	13	6.85e-05	0.308	CATAACTCTTATT
TEA032619.1	CsPPR424	atp6-37	+	33	46	5.66e-05	0.734	TGTTTATGCTGCTA
TEA004209.1	CsPPR425	rps2-134	-	15	30	4.82e-06	0.0582	ATTTGTAATATGAATA
TEA004209.1	CsPPR425	ndhD-674	-	17	32	6.77e-05	0.409	ATCGGTGATTTGACAG
TEA019934.1	CsPPR426	rps18-221	+	33	42	9.59e-05	1	TTTTCTTAAT
TEA029822.1	CsPPR427	psaI-80	+	26	36	6.74e-05	0.951	CTCTTCATGTT
TEA017053.1	CsPPR432	rps1-56	+	9	17	4.95e-05	0.706	TTGTATGCA
TEA014493.1	CsPPR436	rpoC1-62	-	8	18	1.91e-05	0.198	TCGGAGTTGTT
TEA014493.1	CsPPR436	cob-358	+	33	43	2.84e-05	0.198	TCGGAGTTGTA
TEA014493.1	CsPPR436	atpF-92	-	18	28	5.77e-05	0.251	TTGGATTTGTT
TEA014493.1	CsPPR436	cox2-71	-	36	46	7.19e-05	0.251	TAGGTGTTGCT
TEA014493.1	CsPPR436	nad5-679	+	30	40	9.03e-05	0.252	TTGGTGCTGTT
TEA011992.1	CsPPR437	ndhB-467	+	31	41	1.59e-05	0.219	TGTTTCAGTTT
TEA006913.1	CsPPR438	nad3-43	+	3	15	6.84e-07	0.00898	TTTGTATCTATTT
TEA006913.1	CsPPR438	ndhD-1310	-	39	51	3.45e-06	0.0227	CTTGTATCCATAG
TEA003047.1	CsPPR439	nad5-838	+	12	22	3.51e-05	0.495	CTTTATTTGAA
TEA022405.1	CsPPR443	ccmFn-1555	+	29	41	7.85e-06	0.0999	GTTCATAGTTTTG
TEA006805.1	CsPPR444	nad5-728	-	12	26	9.33e-05	0.592	GACCAAGTATGCGAT
TEA006805.1	CsPPR444	nad5-716	-	24	38	9.33e-05	0.592	GACCAAGTATGCGAT
TEA017789.1	CsPPR448	rps8-182	+	11	25	8.94e-05	1	ATTTTTTTTTGGTTT
TEA020256.1	CsPPR449	ccmFc-1133	-	12	24	3.92e-05	0.459	ATTTGTATGTATA
TEA020256.1	CsPPR449	rps1-56	+	7	19	6.98e-05	0.459	ATTTGTATGCAAA
TEA002462.1	CsPPR451	rps8-182	+	10	18	1.61e-05	0.234	AATTTTTTT
TEA002462.1	CsPPR451	rps8-182	+	11	19	4.55e-05	0.33	ATTTTTTTT
TEA002462.1	CsPPR451	rps8-182	+	9	17	7.78e-05	0.376	AAATTTTTT
TEA003329.1	CsPPR455	nad5-245	+	30	42	1.61e-05	0.215	CGTAGTGATGTTA
TEA003329.1	CsPPR455	atp6-548	+	6	18	5.65e-05	0.264	AGTAAAGATTTTA
TEA003329.1	CsPPR455	petB-611	+	3	15	5.94e-05	0.264	CGTATTTATGTTA
TEA018125.1	CsPPR456	ndhD-1310	+	10	19	1.33e-05	0.179	TATTTATTAT
TEA031648.1	CsPPR459	ccmB-87	+	3	12	1.04e-05	0.0497	TTTTCTCCAT
TEA031648.1	CsPPR459	ccmB-80	+	10	19	1.04e-05	0.0497	TTTTCTCCAT
TEA031648.1	CsPPR459	ccmB-71	+	19	28	1.04e-05	0.0497	TTTTCTCCAT
TEA031648.1	CsPPR459	ccmFn-1486	+	4	13	2.31e-05	0.083	CCTTCTTCAT
TEA009828.1	CsPPR462	matR-1722	-	22	33	4.17e-05	0.561	GGACTTGGTAAA
TEA030763.1	CsPPR463	nad5-838	+	35	47	2.13e-05	0.275	GCTTTGATTGTTA
TEA030763.1	CsPPR463	psbZ-50	+	7	19	5.86e-05	0.378	GCATTAATTGCTA
TEA028689.1	CsPPR464	ndhD-1310	+	35	47	9.5e-05	1	TGTTCTATGGATA
TEA028708.1	CsPPR465	matR-1722	-	22	33	4.17e-05	0.561	GGACTTGGTAA
TEA010575.1	CsPPR466	ndhA-341	-	11	23	1.92e-05	0.242	TAACTTAATAAAA
TEA016985.1	CsPPR467	ccmFn-1486	+	30	41	6.49e-05	0.576	TTAATATTGTGA
TEA016985.1	CsPPR467	rps18-221	+	19	30	8.81e-05	0.576	TTATCTTCGTTA
TEA009794.1	CsPPR472	rpl10-341	+	31	40	2.26e-05	0.326	TATGGGCAAT
TEA017929.1	CsPPR477	cob-853	-	41	51	2.5e-05	0.338	TCAGGTATACT
TEA017929.1	CsPPR477	nad41-101	+	33	43	8.39e-05	0.566	TTTGGTATTTT
TEA017128.1	CsPPR479	ndhB-611	+	8	22	1.35e-05	0.0868	TCTCTTGGCTATATG
TEA017128.1	CsPPR479	ndhB-586	+	33	47	1.35e-05	0.0868	TCTCTTGGCTATATG
TEA017128.1	CsPPR479	rps8-182	+	15	29	7.44e-05	0.319	TTTTTTGGTTTCAAC
TEA015584.1	CsPPR480	ndhB-1481	-	19	27	4.91e-06	0.0741	TGGTATAGT
TEA010256.1	CsPPR483	cob-853	-	41	51	2.5e-05	0.341	TCAGGTATACT
TEA010256.1	CsPPR483	nad41-101	+	33	43	8.29e-05	0.397	TTTGGTATTTT
TEA010256.1	CsPPR483	orf115b-77	+	14	24	8.75e-05	0.397	CAAGGTACATC
TEA019796.1	CsPPR484	ndhF-290	+	34	44	6.17e-05	0.879	ATCACTACTGT
TEA002785.1	CsPPR485	cob-419	+	10	20	4.74e-06	0.062	TTTATAGGATA
TEA021208.1	CsPPR490	ccmB-514	+	21	28	6.51e-05	0.25	TTTCTCGT
TEA021208.1	CsPPR490	ccmB-512	+	23	30	6.51e-05	0.25	TTTCTCGT
TEA021208.1	CsPPR490	ccmB-503	+	32	39	6.51e-05	0.25	TTTCTCGT
TEA021208.1	CsPPR490	ccmB-494	+	41	48	6.51e-05	0.25	TTTCTCGT
TEA028131.1	CsPPR498	rpl5-172	+	7	18	3.25e-05	0.192	ATTGGCTATGGA
TEA028131.1	CsPPR498	rpl5-169	+	10	21	3.25e-05	0.192	ATTGGCTATGGA
TEA028131.1	CsPPR498	ndhA-341	+	37	48	5.28e-05	0.192	TTTGGCTACCGT
TEA028131.1	CsPPR498	atp6-254	+	6	17	5.55e-05	0.192	CTCGGTTACTTT
TEA028131.1	CsPPR498	ndhB-611	+	11	22	9.82e-05	0.227	CTTGGCTATATG
TEA028131.1	CsPPR498	ndhB-586	+	36	47	9.82e-05	0.227	CTTGGCTATATG
TEA010442.1	CsPPR499	ndhD-887	-	2	8	9.66e-05	0.749	TAGATTA
TEA010442.1	CsPPR499	ndhD-878	-	11	17	9.66e-05	0.749	TAGATTA
TEA018101.1	CsPPR501	nad5-634	-	24	31	7.8e-05	0.607	ATTGCGAG
TEA018101.1	CsPPR501	nad5-632	-	26	33	7.8e-05	0.607	ATTGCGAG
TEA025782.1	CsPPR503	cob-178	+	9	19	4.93e-05	0.651	TTTTTTTAGCT
TEA025782.1	CsPPR503	nad5-509	-	9	19	9.27e-05	0.651	CTTTTATAGCT
TEA017587.1	CsPPR504	ndhF-290	-	6	18	9.34e-06	0.0674	AGAAGTAAGTGGA
TEA017587.1	CsPPR504	cob-568	-	33	45	1.52e-05	0.0674	AAAATAAAGGGGA
TEA017587.1	CsPPR504	rps2-248	+	8	20	2.48e-05	0.0674	AAAATAAAGTAGC
TEA017587.1	CsPPR504	ccmB-87	-	6	18	3.09e-05	0.0674	AGAGGAATGGAGA
TEA017587.1	CsPPR504	ccmB-80	-	13	25	3.09e-05	0.0674	AGAGGAATGGAGA
TEA017587.1	CsPPR504	ccmB-71	-	22	34	3.09e-05	0.0674	AGAGGAATGGAGA
TEA017587.1	CsPPR504	rps12-100	+	12	24	9.17e-05	0.171	AGAAGCAAGGAGT
TEA020255.1	CsPPR507	nad5-716	+	5	12	3.58e-05	0.174	GGAAATCT
TEA020255.1	CsPPR507	matK-445	+	40	47	3.58e-05	0.174	GGAAATCT
TEA020255.1	CsPPR507	nad5-679	+	42	49	3.58e-05	0.174	GGAAATCT
TEA020255.1	CsPPR507	matK-1234	+	8	15	7.93e-05	0.29	AGAAATCT
TEA002138.1	CsPPR510	cob-914	-	23	31	9.71e-05	0.461	ATATAGAAA
TEA002138.1	CsPPR510	cob-908	-	29	37	9.71e-05	0.461	ATATAGAAA
TEA002138.1	CsPPR510	matK-1234	+	4	12	9.71e-05	0.461	ATATAGAAA
TEA022909.1	CsPPR511	rps12-196	+	36	43	2.41e-05	0.373	GCGAAGGT
TEA006854.1	CsPPR514	cox2-742	-	30	44	7.08e-05	0.596	TTAATTGATTAGATA
TEA006854.1	CsPPR514	ccmB-128	+	4	18	9.6e-05	0.596	CTAGGTTTTGAAAAA
TEA008433.1	CsPPR515	psbE-214	-	7	14	4.35e-05	0.433	CAGTTATT
TEA008433.1	CsPPR515	cox2-443	+	18	25	8.71e-05	0.433	CAGTTATA
TEA008433.1	CsPPR515	cob-325	+	31	38	8.71e-05	0.433	GAGTTATA
TEA013887.1	CsPPR523	matK-1234	-	36	44	4.91e-06	0.0732	TTTTTGAGG
TEA020746.1	CsPPR533	ndhK-81	+	11	21	1.67e-05	0.232	TCTTAATTGTT
TEA020746.1	CsPPR533	ccmB-286	-	9	19	3.84e-05	0.237	TACCAATTGTA
TEA020746.1	CsPPR533	cox2-742	-	36	46	6.48e-05	0.237	GATTAATTGAT
TEA020746.1	CsPPR533	nad5-679	+	24	34	6.79e-05	0.237	TTCTTATTGGT
TEA005579.1	CsPPR554	rpl10-101	-	4	10	7.93e-05	0.3	ATGAGAT
TEA005579.1	CsPPR554	rpl10-83	-	22	28	7.93e-05	0.3	ATGAGAT
TEA005579.1	CsPPR554	nad5-634	+	32	38	7.93e-05	0.3	ATGAGAT
TEA005579.1	CsPPR554	nad5-632	+	34	40	7.93e-05	0.3	ATGAGAT
TEA003189.1	CsPPR562	ndhB-586	+	18	24	6.51e-05	0.334	TTCTGGT
TEA003189.1	CsPPR562	atpB-23	+	21	27	6.51e-05	0.334	TTCTGGT
TEA003189.1	CsPPR562	atp1-1415	-	39	45	6.51e-05	0.334	TTCTGGT
TEA033068.1	CsPPR564	atp4-59	+	12	18	5.35e-05	0.415	TGCTGCT
TEA033068.1	CsPPR564	atp6-37	+	39	45	5.35e-05	0.415	TGCTGCT
TEA002333.1	CsPPR565	rpoC2-2849	-	14	20	6.51e-05	0.504	TTGGATG
TEA002333.1	CsPPR565	atpA-791	-	26	32	6.51e-05	0.504	TTGGATG
